# Supplementary material for: Is a smartphone application (BlueIce) acceptable and safe for university students who self-harm: an open study
Source: PubMed Central journal article supplement — BMJ Open. 2024 Apr 24;14(4):e069862. doi: 10.1136/bmjopen-2022-069862 (PMC11043752; doi:10.1136/bmjopen-2022-069862), 2024-04-24
Supplement: bmjopen-2022-069862.draft_revisions.pdf [file bmjopen-2022-069862.draft_revisions.pdf]

# BMJ Open

BMJ Open is committed to open peer review. As part of this commitment we make the peer review history of every article we publish publicly available.

When an article is published we post the peer reviewers' comments and the authors' responses online. We also post the versions of the paper that were used during peer review. These are the versions that the peer review comments apply to.

The versions of the paper that follow are the versions that were submitted during the peer review process. They are not the versions of record or the final published versions. They should not be cited or distributed as the published version of this manuscript.

BMJ Open is an open access journal and the full, final, typeset and author-corrected version of record of the manuscript is available on our site with no access controls, subscription charges or pay-per-view fees (<http://bmjopen.bmj.com>).

If you have any questions on BMJ Open's open peer review process please email [info.bmjopen@bmj.com](mailto:info.bmjopen@bmj.com)

# BMJ Open

**An open study to explore the acceptability, safety, and effects of a smartphone application for university students who self-harm.**

|                               |                                                                                                                                                                                                                                                                                                           |
|-------------------------------|-----------------------------------------------------------------------------------------------------------------------------------------------------------------------------------------------------------------------------------------------------------------------------------------------------------|
| Journal:                      | <i>BMJ Open</i>                                                                                                                                                                                                                                                                                           |
| Manuscript ID                 | bmjopen-2022-069862                                                                                                                                                                                                                                                                                       |
| Article Type:                 | Original research                                                                                                                                                                                                                                                                                         |
| Date Submitted by the Author: | 04-Nov-2022                                                                                                                                                                                                                                                                                               |
| Complete List of Authors:     | Cliffe, Bethany; University of Bath, Moore, Emma; Oxford Health NHS Mental Health Trust, Child and Adolescent Mental Health Services<br>Whittle, Kathryn; Oxford Health NHS Mental Health Trust, Child and Adolescent Mental Health Services<br>Stallard, Paul; University of Bath, Department for Health |
| Keywords:                     | MENTAL HEALTH, Suicide & self-harm < PSYCHIATRY, Telemedicine < BIOTECHNOLOGY & BIOINFORMATICS                                                                                                                                                                                                            |
|                               |                                                                                                                                                                                                                                                                                                           |

SCHOLARONE™  
Manuscripts

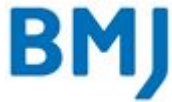

I, the Submitting Author has the right to grant and does grant on behalf of all authors of the Work (as defined in the below author licence), an exclusive licence and/or a non-exclusive licence for contributions from authors who are: i) UK Crown employees; ii) where BMJ has agreed a CC-BY licence shall apply, and/or iii) in accordance with the terms applicable for US Federal Government officers or employees acting as part of their official duties; on a worldwide, perpetual, irrevocable, royalty-free basis to BMJ Publishing Group Ltd ("BMJ") its licensees and where the relevant Journal is co-owned by BMJ to the co-owners of the Journal, to publish the Work in this journal and any other BMJ products and to exploit all rights, as set out in our [licence](#).

The Submitting Author accepts and understands that any supply made under these terms is made by BMJ to the Submitting Author unless you are acting as an employee on behalf of your employer or a postgraduate student of an affiliated institution which is paying any applicable article publishing charge ("APC") for Open Access articles. Where the Submitting Author wishes to make the Work available on an Open Access basis (and intends to pay the relevant APC), the terms of reuse of such Open Access shall be governed by a Creative Commons licence – details of these licences and which [Creative Commons](#) licence will apply to this Work are set out in our licence referred to above.

Other than as permitted in any relevant BMJ Author's Self Archiving Policies, I confirm this Work has not been accepted for publication elsewhere, is not being considered for publication elsewhere and does not duplicate material already published. I confirm all authors consent to publication of this Work and authorise the granting of this licence.

1  
2  
3  
4  
5  
6  
7  
8  
9  
10  
11  
12  
13  
14  
15  
16  
17  
18  
19  
20  
21  
22  
23  
24  
25  
26  
27  
28  
29  
30  
31  
32  
33  
34  
35  
36  
37  
38  
39  
40  
41  
42  
43  
44  
45  
46  
47  
48  
49  
50  
51  
52  
53  
54  
55  
56  
57  
58  
59  
60

## An open study to explore the acceptability, safety, and effects of a smartphone application for university students who self-harm.

Corresponding author:

Bethany Cliffe

[Bc731@bath.ac.uk](mailto:Bc731@bath.ac.uk)

Department for Health

University of Bath

Claverton Down Campus

BA2 7AY

Bath

UK

Paul Stallard

Department for Health

University of Bath

Bath

UK

Emma Moore

Child and Adolescent Mental Health Services

Oxford Health NHS Trust

Bristol

UK

Kathryn Whittle

Child and Adolescent Mental Health Services

Oxford Health NHS Trust

Bristol

UK

Word Count: 8355

## Abstract

Background: Many university students self-harm but few receive support. Smartphone apps have been identified as acceptable sources of support for students who self-harm, but the use of self-harm prevention apps is yet to be explored in this population.

Objective: This study sought to explore the acceptability, safety and effects of a specific app (BlueIce) for university students who self-harm.

Methods: This was an exploratory, mixed methods study with 15 university students attending university wellbeing services with self-harming thoughts and/or behaviours. BlueIce was offered alongside the face-to-face support provided by the wellbeing service. Self-harming thoughts and behaviours, coping self-efficacy, and symptoms of anxiety and depression were measured before and after using BlueIce for 6 weeks. Follow up interviews were also undertaken to explore how students perceived BlueIce in more in depth.

Results: Following app use, there were statistically significant reductions in symptoms of anxiety and depression. Participants found BlueIce to be acceptable, safe and helpful, and reported that they were more able to cope with difficult feelings and better understand their self-harm triggers following use of the app.

Conclusion: BlueIce was an acceptable, safe and helpful source of support for university students struggling with self-harm thoughts and/or behaviours. This builds on previous findings with adolescents and suggests that BlueIce could be a particularly acceptable and helpful resource for university students.

### Strengths and limitations

- The first study to evaluate a self-help smartphone app with university students who self-harm
- Qualitative findings were evaluated using a pre-existing framework for evaluating engagement with digital interventions
- Semi-structured interviews provided rich feedback on how students perceived the app.
- Recruitment challenges meant a small sample size for the quantitative analyses.

## Introduction

### Self-harm among university students

Self-harm is particularly prevalent at universities, with university students being twice as likely to self-harm than their non-student peers [1]. This may result from the numerous challenges that students face while at university, associated with academic, financial, geographical and social stressors, which leave them more vulnerable to experiencing mental health difficulties [2]. It is estimated that around a quarter of students will self-harm while at university [3], however, self-harm often goes unreported due to the shame, stigma and misconceptions surrounding it [4, 5, 6, 7, 8, 9]. This means that prevalence rates are often underestimated and that very few students who self-harm ever seek or receive professional help [10, 11]. This suggests that alternative options for support should be explored.

In a qualitative study, 25 UK university students with lived experience were interviewed about their opinions on support available for self-harm [12]. This study found that whilst some students appreciated the benefits of human connection that came with professional support, several barriers to seeking help were identified [12]. These included long waiting lists for mental health services, not wanting to take up support when they believed others may need it more, worrying about receiving a negative response upon disclosing self-harm, and feeling embarrassed and ashamed of self-harming. This study also explored how students perceive digital interventions, and found that they were viewed positively. In particular, students valued the anonymity, accessibility and convenience they can offer. In addition, students reported that they felt less exposed and inhibited compared to speaking with someone face-to-face, and noted how they always have their phones on them so could access a smartphone-based digital intervention anytime and anywhere [12].

These findings have been corroborated elsewhere, with a survey of 479 college/university students showing that around three quarters had used or were using a digital mental health intervention, and high satisfaction rates were reported [13]. Interestingly, 91% of participants in this study indicated that they had experienced barriers to accessing mental health services. This further suggests that digital mental health interventions can bridge the gap between students and mental health support.

Research has also investigated the effectiveness of digital mental health interventions for university students. A systematic review found that digital interventions are effective in reducing symptoms of anxiety and depression, while also improving psychology wellbeing among students [14]. This was also found in a randomised controlled trial with UK university students, where use of a mental health app significantly improved anxiety and depression scores compared to a control group, and that these effects were sustained at follow up [15]. It therefore seems as though digital interventions can be both acceptable to university students and effective in improving their psychological wellbeing.

Given the difficulties students face in seeking professional support for self-harm, coupled with the perceived advantages of digital support, a smartphone application (app) seems like a valued option. However, despite these potential benefits, there is no research investigating the use of a smartphone app for students who self-harm specifically [16].

## BlueIce

A self-harm prevention app (BlueIce) has been evaluated with adolescents aged 12-17. Use of BlueIce was associated with a reduction in symptoms of anxiety and depression, as well as a reduction in the frequency of self-harm behaviours [18]. Qualitative findings also supported the app being acceptable, helpful and safe to use [19]. Given the positive findings from this app with adolescents, preliminary work subsequently investigated whether it could also be of use to university students. Students were shown screenshots of the app while its functionality was explained to them, and they believed that it could help them manage their self-harm while also promoting positive mental wellbeing [17]. Students described how they believed BlueIce could provide relief in moments of distress by offering them distractions or outlets for their feelings, while also offering them longer term coping strategies to help manage their emotions.

Overall, it seems as though BlueIce is an effective and appealing intervention for self-harm that could also be beneficial to university students. However, while the perceived acceptability of BlueIce for university students has been initially explored, the potential effects of the app on the mental health of this group is unknown. This study aims to explore the effects and acceptability of BlueIce for university students with mental health problems and self-harming thoughts and behaviours attending university wellbeing services.

## Methods

### Design

This was an exploratory, open, mixed-methods study employing pre- and post-intervention questionnaires and follow-up interviews.

### Patient and public involvement

This research was informed by participants' responses in a previous study [12] who gave guidance on how best to evaluate interventions for self-harm, meaning their expertise contributed to the choice of measures used here.

### Recruitment

Participants were students at one UK University who were recruited via the university's mental health services. The wellbeing service at this university is comprised of trained counsellors, wellbeing advisors and mental health advisors. They offer various forms of mental health support to students experiencing mild mental health difficulties, or they are able to direct students to more appropriate external specialist support if required. Help available through the university includes talking therapy, counselling, workshops, support groups and self-help resources. Typically, support is available both virtually and in person on the university campus.

Wellbeing staff were informed about the study and the intervention by the researcher, and were asked to highlight the study to any students meeting the inclusion criteria stated below. Posters advertising the study were placed in the waiting room so students were also able to directly sign up for the study. Interested students were directed to an online information sheet with space to enter their email to receive more information about the study. They were then contacted by the researcher (BC) who discussed the study with them either over a call on Microsoft Teams or over email.

1  
2  
3  
4  
5  
6  
7  
8  
9  
10  
11  
12  
13  
14  
15  
16  
17  
18  
19  
20  
21  
22  
23  
24  
25  
26  
27  
28  
29  
30  
31  
32  
33  
34  
35  
36  
37  
38  
39  
40  
41  
42  
43  
44  
45  
46  
47  
48  
49  
50  
51  
52  
53  
54  
55  
56  
57  
58  
59  
60

Students were eligible to participate if:

- 1) They were currently (within the past two months) experiencing self-harm thoughts or behaviours
- 2) They were receiving/due to receive counselling or wellbeing support from the university services
- 3) They were willing to participate
- 4) They owned a smartphone running iOS or Android.

There were no exclusion criteria, although all potential participants were discussed with the university wellbeing service team lead to confirm suitability. All students who were interested in taking part were deemed suitable by the wellbeing team lead.

### Intervention

BlueIce (<https://www.oxfordhealth.nhs.uk/blueice/>) was co-produced with young people with lived experience of self-harm, alongside clinical staff and academics. It has therapeutic grounding in both cognitive behavioural therapy and dialectical behavioural therapy [20] and was developed in line with guidance from the Medical Research Council [21]. In terms of safety, the app is pin-protected and no data is shared outside of the app. BlueIce contains a mood diary, emergency contacts and mood lifting activities that the user can add to and personalise. The activities are informed by common reasons people self-harm and, again, have therapeutic underpinnings. They include photographs, music, physical activities, guided mindfulness recordings and breathing exercises, a thought diary, distress tolerance techniques, and phone numbers of people to contact when at risk of self-harming [20]. Please see appendix 1 for screenshots of the app.

### Procedure

Data collection occurred between March 2021 and February 2022. Consent forms, baseline and post-use questionnaire data were collected using the Online Surveys software (<https://www.onlinesurveys.ac.uk/>). Post-use interviews for participants were conducted using Microsoft Teams and were recorded using the within-software capabilities. Once consent and baseline questionnaires were completed, participants were sent a text containing a unique link to download BlueIce. They were emailed a user guide (please see appendix 2) and a video demonstrating how to use the app. Participants were then free to use the app as they wished and were able to keep the app after the study ended. They attended treatment as usual with the university mental health services during the study but had no other contact with the research team until the follow-up questionnaires and interview six weeks later.

### Measures

*Self-Harm:* To measure self-harm, the Alexian Brothers Urge to Self Injure Scale (ABUSI) [22] and the Ottawa Self-injury Inventory [23] were administered. The Ottawa self-injury Inventory includes a subscale about the addictive nature of self-harm, which was removed for the purposes of this study as it was deemed not to be necessary to address our research aims.

*Anxiety:* The Generalised Anxiety Disorder-7 (GAD-7) [24] is a brief measure that has shown good sensitivity at screening for anxiety disorders. Scores of 5 suggest mild anxiety, 10 suggest



1  
2  
3 moderate anxiety and 15 suggest severe anxiety. It has also been well validated for use with  
4 university students [25, 26, 27].  
5

6  
7 *Depression:* The Patient Health Questionnaire-9 (PHQ-9) [28] is commonly used, has strong  
8 psychometric properties and has previously been used in a sample of UK university students  
9 [28]. A score of 5-9 suggests mild depression, 10-14 moderate depression, 15-19 moderately  
10 severe depression, and a score of 20-27 suggests severe depression.  
11

12  
13 *Coping:* The Coping Self-efficacy scale [29] consists of three subscales: stopping unpleasant  
14 emotions and thoughts, using problem-focused coping, and seeking support from family and  
15 friends. The total maximum score is 260, with greater coping self-efficacy indicated by higher  
16 scores. This measure has good psychometric properties [29] and has previously been used with  
17 university students who self-harm [30].  
18

19  
20 *Acceptability of BlueIce:* Following the six-week intervention period, participants were asked to  
21 complete a questionnaire about the acceptability of BlueIce [18, 19]. This questionnaire was  
22 developed by the researchers and explores engagement with the app, experience of using the app,  
23 and any impact that the app has had. Please see appendix 3.  
24

## 25 Interview Schedule

26 Semi-structured interviews were conducted following the trial period that explored participants'  
27 experiences of using BlueIce and any impact they perceived it to have had on their mental  
28 wellbeing. The interviews were semi-structured and lasted between 15 and 45 minutes ( $M =$   
29  $24.6$ ,  $SD = 10.34$ ). The interview schedule was designed by BC and was informed by previous  
30 interview schedules used to determine the acceptability of BlueIce with adolescents [19] and  
31 university students [17]. This began with an open question 'what did you think about BlueIce',  
32 with prompt questions asking for feedback on specific elements of the app used if participants  
33 struggled to answer. Questions were also included that asked about any perceived impact of  
34 BlueIce and whether they believed BlueIce could be helpful for other university students.  
35  
36

## 37 Data analysis

38  
39 Descriptive statistics were used to summarise the sample with regards to demographic  
40 characteristics, self-harm characteristics and anxiety and depression symptomatology. Paired  
41 samples t-tests were used to assess pre-post change on quantitative measures.  
42  
43

44 Follow up interviews were analysed using qualitative content analysis, to allow for both an  
45 exploration and quantification of the qualitative data. The transcripts were first transcribed  
46 verbatim by BC. All three coders (BC, KW, and EM) then read and re-read the transcripts until  
47 they had become immersed in the data. Three transcripts were picked at random for BC, KW and  
48 EM to code in order to develop a coding frame (please see appendix 4). No more than 10 key  
49 codes in the frame were aimed for, so as not to have more codes than transcripts, but ultimately  
50 11 were settled on [31]. The rest of the transcripts were then independently coded in batches of  
51 two transcripts at a time, after which the three coders met to discuss and make any necessary  
52 adaptations to the coding frame. As there were more than two coders, Cronbach's alpha was used  
53 to measure inter-coder reliability, which suggested good agreement,  $\alpha = .79$ .  
54  
55  
56  
57  
58  
59  
60

1  
2  
3 While the codes and the coding frame were developed inductively and independently, BC, KW  
4 and EM identified that the codes aligned with a pre-existing framework of engagement with  
5 digital interventions [32]. The codes were therefore organised relative to the categories within  
6 this framework during analysis (please see appendix 5). The framework is divided into  
7 intervention-specific factors ('suitability', 'usability' and 'acceptability') and person-specific  
8 factors ('motivation', 'capability' and 'opportunity'), with codes exemplifying each category and  
9 barriers and facilitators to each. To operationalise this framework within the context of our  
10 findings, BC, KW and EM developed definitions for each of these categories:  
11  
12

### 13 *Intervention-specific factors*

14 Suitability: The suitability (or not) of this intervention with this population specifically, i.e.,  
15 whether it could be feasibly implemented in this population.  
16  
17

18 Usability: Factors affecting the overall experience of using the app (e.g. enjoyment, ease of use)  
19 either positively or negatively to determine whether the app is fit for purpose.  
20  
21

22 Acceptability: Specific factors or features of the intervention (relating to the content and  
23 purpose) that the target population liked or disliked, as well as more general, overall perception  
24 of the app as acceptable or not.  
25

### 26 *Person-specific factors*

27 Motivation: Whether the target population had enough reason to want to use it or not, both  
28 initially and more long term, because of the perceived need for the app or its perceived impact/  
29 helpfulness. This relates to more internal drive factors, such as the extent to which they wanted  
30 to use it.  
31  
32

33 Capability: Whether the individual was able to use it or not and the barriers to this. Whereas  
34 motivation relates to more personal factors, capability relates more to externally influencing  
35 factors, such as being too busy.  
36  
37

38 Opportunity: Factors which improved or reduced participants' opportunities to receive support  
39 (for mental health and/or self-harm) via the app, as well as opportunities that the app provides or  
40 does not provide.  
41  
42

### 43 *Ethical considerations*

44 This study received ethical approval from the University Research Ethics Approval Committee  
45 for Health [EP 20/21 015]. Participants were provided with an information sheet detailing the  
46 study, allowing them a chance to ask any questions before giving informed consent. They were  
47 informed that they could drop out of the study at any time and without giving a reason, and that  
48 they would be able to remove their data from the study prior to anonymisation. Participants were  
49 made aware that their participation would be confidential and that all responses would be  
50 anonymised. Participants received no financial compensation for taking part.  
51  
52

## 53 *Results*

54  
55  
56  
57  
58  
59  
60

### Sample characteristics

15 participants completed the baseline and follow-up questionnaires, and 10 participants completed the follow up interviews. Participants were mostly white (13/15, 87%), undergraduate (14/15, 93%) females (14/15, 93%) in their first year of study (10/15, 67%). All participants had self-harmed in the last 2 months (8/15, 53%) or were having thoughts of self-harm (7/15, 47%). Participants' ages ranged from 18-26 (mean 19.87, SD 2.39). Please see Table 1 for full participant demographics.

Table 1  
*Demographic characteristics of the sample*

| Demographic (N = 15) |               | n (%)    |
|----------------------|---------------|----------|
| Age                  | 18-20         | 11 (73%) |
|                      | 21-23         | 3 (20%)  |
|                      | 24+           | 1 (7%)   |
| Gender Identity      | Female        | 14 (93%) |
|                      | Male          | 0 (0%)   |
|                      | Non-binary    | 1 (7%)   |
| Year of Study        | 1             | 10 (67%) |
|                      | 2             | 1 (7%)   |
|                      | 3             | 3 (20%)  |
|                      | 4             | 1 (7%)   |
| Degree type          | Undergraduate | 14 (93%) |
|                      | Postgraduate  | 1 (7%)   |
| Ethnicity            | White         | 13 (87%) |

|                  |                                            |         |
|------------------|--------------------------------------------|---------|
|                  | Asian/Asian British                        | 1 (7%)  |
|                  | Black/African/Caribbean/Black British      | 1 (7%)  |
| Sexuality        | Heterosexual                               | 8 (53%) |
|                  | Bisexual                                   | 5 (33%) |
|                  | Prefer not to say                          | 1 (7%)  |
|                  | Pansexual                                  | 1 (7%)  |
| Self-harm Status | Current self-harm <sup>a</sup>             | 8 (53%) |
|                  | Current thoughts of self-harm <sup>a</sup> | 7 (47%) |

<sup>a</sup> This is defined as being within the past two months

### *Anxiety, depression and coping*

Scores of the GAD-7 suggested that anxiety symptomatology was high within the sample (mean 12.47, SD 4.42), with many participants (12/15, 80%) experiencing at least moderate anxiety. Similarly, all participants were experiencing symptoms of at least mild depression (mean 16.50, SD 5.17), with a third (5/15, 33%) experiencing severe depression. On average, participants in this study seemed mildly confident in their abilities to cope (mean 92.93, SD 33.37), although this is lower than has been found in other samples of students who self-harm (e.g., mean 140.25, SD 48.26 [30]).

### *Self-harm*

Questions regarding self-harm thoughts and behaviour did not specify a timeframe so that those who had not self-harmed within the last two months were still able to provide insight into what their self-harming behaviours were typically like. Within the two weeks prior to joining the study, most participants had thoughts of self-harming rarely or occasionally (9/15, 60%) and had self-harmed never or rarely (12/15, 80%). However, when they occurred, urges to self-harm were typically rated as strong (10/15, 67%). Participants were divided on how difficult they found it to resist harming themselves in the past week, with half saying they had not found it at all difficult or had found it mildly difficult (8/15, 53%), while four participants had found it very hard or had been unable to resist harming themselves (27%).

On average, participants were aged 15 (SD 2.42) when they first self-harmed, although ages ranged from 10-19. Nearly all participants had last self-harmed within the past two years (14/15, 93%), with one participant not having self-harmed since 2011. Around a quarter of participants

1  
2  
3 reported that they usually never tell anybody if /when they self-harm (4/15, 27%), while the most  
4 common sources of support sought were university counsellors (9/15, 60%) (this was expected  
5 given that participants were recruited through university wellbeing services) and friend(s) (8/15,  
6 53%). Cutting was the most common method of self-harming among the sample (11/15, 73%).  
7 When self-harming, only one participant (1/15, 7%) reported never feeling relief afterwards, and  
8 relief typically either lasted between 1-30 minutes (8/15, 53%) or for hours (5/15, 33%). When  
9 self-harming, between 1-60 minutes typically elapsed between thinking about it and acting upon  
10 it (11/13, 73%). Techniques most used to distract themselves from self-harming were talking  
11 with someone (9/15, 60%), doing anything to keep their hands busy (8/15, 53%) and watching  
12 TV (8/15, 53%). On a scale of 0 – 4, participants were moderately motivated to stop self-  
13 harming (mean 2.93, SD .80) and felt moderately able to stop self-harming (mean 2.40, SD  
14 1.12). The most common sources of treatment the sample had received were self-help (6/15,  
15 40%) or university counselling (5/15, 33%). The function subscale within the Ottawa Self-injury  
16 Inventory determined that students typically self-harmed for internal emotion regulation (mean  
17 12.69, SD 6.36), and were least likely to self-harm for sensation seeking (mean 1.36, SD 1.95).

## 21 Quantitative Results

### 22 Differences before and after treatment

23  
24 After the trial period, participants scored significantly lower on symptoms of anxiety as assessed  
25 by the GAD7 (mean 10.00, SD 4.16),  $t(14) = 2.26$ ,  $P = .040$ ,  $d = .58$ , and on symptoms of  
26 depression assessed by the PHQ 9 (mean 12.47, SD 3.66),  $t(13) = 5.50$ ,  $P < .001$ ,  $d = 1.47$ . Scores  
27 on the ABUSI were lower following the trial period (mean 11.07, SD 1.48) compared to before  
28 the trial period (mean 13.13, SD 6.66) although this difference was not statistically significant  
29  $t(14) = 1.49$ ,  $P = .16$ ,  $d = .38$ . Similarly, scores on the coping measure were not statistically  
30 significantly higher after the trial period, however, scores for the ‘stop unpleasant thoughts and  
31 emotions’ subscale were significantly higher (i.e. improved) on post-measures (mean 28.60, SD  
32 15.32) than on pre-measures (mean 21.80, SD 10.27),  $t(14) = -2.36$ ,  $P = .033$ ,  $d = .61$ .

### 33 BlueIce Use

34  
35 Over the six weeks, the median use of BlueIce was between six and 12 times (5/15, 33%), with  
36 3/15 (20%) using it a couple of times a week, every day and at least once a day, respectively.  
37 Two participants did not use BlueIce at all (15%), because they forgot to. Of the 13 participants  
38 who used the app, 11 (73%) personalised BlueIce by adding their own ideas to different sections  
39 of the app. Just over a third (5/13, 39%) set reminders to use the app, but everyone used the  
40 mood diary to track their mood. The majority (11/13, 85%) chose to use BlueIce in distressing  
41 moments when they felt like harming themselves, and almost half said that it did stop some  
42 episodes of self-harm (6/11\*, 55%). Over half said that they definitely would continue to use  
43 BlueIce (8/13, 62%) with only one person reporting that they would not (1/13, 8%). On a scale of  
44 0-4, participants rated that they typically found BlueIce easy to use (mean 3.54, SD .52) and  
45 helpful (mean 2.47, SD 1.20), and that they would likely recommend to others (mean 2.73, SD  
46 1.16). On the other hand, participants were less sure that they preferred BlueIce to face to face  
47 meetings (mean 1.38, SD 1.30). On a scale of 1-10, participants indicated that they had  
48 experienced small improvements in their self-harm (mean 4.31, SD 2.50) and mental health  
49 (mean 3.46, SD 2.73) since using BlueIce. Out of five, on average participants gave BlueIce 3.46  
50 (SD 1.05) stars.

1  
2  
3  
4 \*two participants did not answer this question  
5

## 6 Qualitative results 7

8 Qualitative interviews were completed with 10 participants.  
9

### 10 Intervention-specific factors 11

#### 12 **Suitability: Facilitators** 13

14 Although BlueIce was originally designed for adolescents, most participants felt that it was  
15 appropriate for university students. One participant commented that being designed for a  
16 younger population may have been beneficial as the app was simple to use:  
17

18 *'I didn't think it was [designed for adolescents]. It didn't look that way, although, like, I did like  
19 how clean and simple it was. I think it stops it being almost, like, distracting, and I liked how  
20 clean it looked' [012]*  
21  
22

23  
24 Two participants (20%) felt that the app would be particularly suitable for students who are more  
25 introverted or isolated and who may struggle to seek professional support:  
26

27 *'Or maybe for a person even who is, like, really, you know, a shy person and not so really  
28 outgoing. And, you know, maybe doesn't want to talk to a therapist or something. For those  
29 people, maybe, you know, an app would be better option.'* [016]  
30  
31

32 Finally, four participants (40%) discussed how the scope of BlueIce seemed to extend beyond  
33 self-harm, as *'to me it seems like the kind of thing that most people would probably find useful'*  
34 *[008]*. Participants specified that it would also be suitable for students who are struggling more  
35 generally, for example with exam stress, anxiety, or frustration:  
36

37 *'I think this could definitely be used by people who are dissociating or having other issues that  
38 aren't self-harm, like feeling really anxious for example, feeling really down, just not knowing  
39 what to do or feeling really overwhelmed, I think it could be used for a lot of different things'*  
40 *[006]*  
41  
42

#### 43 **Suitability: Barriers** 44

45 Conversely, three participants (30%) also discussed how the intervention may not be suitable for  
46 everybody, as people have different experiences of self-harm and different needs from support:  
47

48 *'It seemed like a good app, but not so suited to the way I sort of deal with things... I sort of tried  
49 out some of the mood...what is it called? The... the ones where it's like methods of coping? I  
50 tried out some of those. And, I like, I just didn't find any of them sort of suited to me, like I've still  
51 not worked out any particular ways of dealing with it myself. So I think, like, yeah, I think it's  
52 good, just not for me.'* [008]  
53  
54  
55  
56  
57  
58  
59  
60

1  
2  
3 This also exemplifies how there tended to be a recognition among participants that, even if  
4 BlueIce may not have been particularly suitable for them, they could see how it could be of value  
5 to others.  
6

### 8 **Usability: Facilitators**

9 Participants typically found the app simple and easy to use. They appreciated it giving them  
10 prompts and guiding them through the app pages, as they noted how moments of distress can be  
11 overwhelming, making it difficult to organise thoughts independently:  
12

13 *'I really like the pages where you can answer questions and, like, the buttons because I hate,*  
14 *like, speaking. Like, in those moments I hate speaking. I hate like... I find it really hard*  
15 *sometimes, I can like, you know, write down my thoughts on, like, that page. But like, a lot of the*  
16 *time I just can't, like, I'm too overwhelmed or, like, I just, yeah, I don't know what I'm thinking,*  
17 *but having the questions or the little buttons like, I love that... because it just helps me so much*  
18 *be able to find what I need... So being given prompts, um, is really, yeah, I really, really like*  
19 *that.'* [010]  
20  
21

22  
23 The simplicity of the app design was highlighted by 7 participants, with references being made to  
24 it not being overwhelming with too many options. The aesthetics of the app were also praised by  
25 five participants (50%), who enjoyed the colour scheme, the icons, the inconspicuous nature of  
26 the app, the format, and the logo.  
27

28  
29 *'Everything looks so happy on the phone. I mean, I like the color. The color is really good. The*  
30 *blue and white.... And I think also, yeah, when I was doing it then, when the light is off in the*  
31 *night in bed, it had like this, I don't know, dreamy, calm effect of me, like a cloud or, I don't*  
32 *know, yeah, something like that. It does something to you, just the color and the design.'* [016]  
33

34  
35 Four participants (40%) also felt that the app was private, and appreciated having the passcode so  
36 that nobody but them could access it. This helped users to feel more confident being open with  
37 the app, knowing that their thoughts and feelings would be kept secure.  
38

39  
40 *'I would say the pin password that you set up, that you need to access the app, it was helpful and*  
41 *it create a sense of privacy and especially, I mean less so now because obviously I don't live at*  
42 *home, but there's part of me that likes the idea of, you know, say, if ever anyone was looking*  
43 *over my phone or trying to access my phone knowing that, you know, I wouldn't have to... you*  
44 *know, there'd be preventions, I won't have to feel like I was at risk of someone opening it up and*  
45 *seeing everything.'* [013]  
46

47  
48 Finally, the option to set reminders to use the app was praised by 3 participants (30%), including  
49 one participant who did not use the app frequently, as they acknowledged that it would have  
50 helped them to engage more with the app if they had done so.  
51

### 52 **Usability: Barriers**

53 While the majority of participants responded positively to the app design and content, one  
54 participant did not like the colours and would have preferred pastel colours that would have felt  
55 more soothing for them:  
56  
57  
58  
59  
60

1  
2  
3  
4  
5  
6  
7  
8  
*'Just generally thinking about the colour scheme (laughter) maybe more soothing colours, I know it's called BlueIce but maybe the calm of a slightly paler blue... I think a pastel kind of thing would be better' [003]*

9  
10  
11  
12  
13  
14  
The other barriers to usability identified by one participant was that the music section within BlueIce did not link with Spotify, but only Apple Music or music saved on the user's phone, and that they were not able to select more than one photo at a time to upload to the 'good times' section.

#### 15 **Acceptability: Facilitators**

16  
17  
18  
19  
20  
21  
Further to BlueIce being perceived as suitable and usable, participants also discussed how it was acceptable and safe to use. Four participants specifically discussed how they do not perceive any risks to BlueIce being widely used, as they *'really didn't see anything on the app that kind of made me feel any negative emotions or anything.'* [016]

22  
23  
24  
25  
One participant elaborated on how they were initially concerned that having an app for self-harm on their phone could be triggering and make them more likely to self-harm, but that they were glad that this was not the case:

26  
27  
28  
29  
30  
31  
32  
*'There was part of me that was a little bit nervous that having the app would make me focus more on self-harm and so therefore maybe, you know, like it would be in the forefront of my head because I'd be seeing the app on my phone everyday... but that didn't happen which was great, I think partly because the app itself is quite innocuous on my phone... it's not glaring at you that it's for self-harm.'* [013]

33  
34  
35  
36  
37  
38  
Participants commented on the specific features within the app that they found helpful, for example the toolbox of mood lifting activities, as having these ideas suggested to them made it easier to find an alternative way of coping in the moment, rather than using self-harm, as the app helped them to remember other things they can do instead:

39  
40  
41  
42  
43  
*I think in the moment you can kind of, like, forget what you can do. I definitely always, like, don't know what to do, which means it [self-harm] becomes the only option, so just, like, being able to see in front of me that, like, there are things I can do to help, it just makes it easier.'* [012]

44  
45  
46  
47  
48  
Another benefit of the toolbox that was highlighted was the option to personalise it by adding the users own ideas to the different sections, as well as making notes of what they tried and whether it worked or not. Three participants (30%) discussed how this helped the app feel more tailored to them and to feel less impersonal.

49  
50  
51  
52  
53  
54  
55  
56  
57  
58  
59  
60  
Importantly, over half of participants (7/10, 70%) specifically mentioned the mood diary as being a positive feature of the app, as it meant that they were able to track how they had been feeling over previous days. Participants commented how this helped them to feel more aware of their mood and the reasons behind it:



1  
2  
3 *I like knowing what helps you, like if you need a break, what makes you, like, happy and like,*  
4 *looking back on times when you've been feeling, like, your best. But also knowing and*  
5 *understanding, like, when you're struggling, like, why that might be. I think just writing it down*  
6 *can definitely help' [012]*  
7

8  
9 Further to helping users' to understand their moods and what mediates them, participants also  
10 discussed how the mood diary helped change their perspective, by helping them to acknowledge  
11 their good days as well as their bad:  
12

13 *I also noticed something when I checked the calendar because, obviously I can see the color*  
14 *codes right, and I felt happy seeing, for example, three or four green ones instead of seeing like,*  
15 *you know, a red and orange and stuff like that. Yeah, I felt like this also had an impact on then*  
16 *how I felt when I saw it. You know, I was like, 'ohh actually I do have good days. My life is not*  
17 *only like, you know, so stressful and bad' because I can see all the green color.' [016]*  
18  
19

20 Further to the mood diary helping users to be aware of their mood and improving their  
21 perspective, three participants (30%) also noted how it provided a useful outlet for them that  
22 offered some relief from their difficult emotions:  
23

24  
25 *I think it was great for kind of like, when I didn't feel well for just, putting like, you know, notes*  
26 *down about like, my emotions, what I'm feeling...I just noticed that, kind of, when I write things*  
27 *down when I'm not feeling well, I write it out, it's kind of like a little bit of relief as well' [016]*  
28  
29

### 30 **Acceptability: Barriers**

31 Despite the mostly positive perception of the mood diary, one of the barriers to acceptability  
32 discussed by four participants was the mood diary being oversimplified. While some participants  
33 enjoyed the simplicity of the app, others felt that the spectrum of emotions available on the mood  
34 diary did not capture their range of experiences, and that the 'other' option was not sufficient:  
35

36 *I guess sometimes the mood tracker, just because it only has emotions on one spectrum, so it's*  
37 *either just happy or sad. Even though there was an 'other' option, you could change the words*  
38 *but you couldn't change the colour of the, I dunno what you'd call it, but you can't change the*  
39 *colour of the thing' [001]*  
40  
41

42 Another participant liked the idea of using a mood diary but found that, upon actually using it,  
43 that the reminders to track their mood made them more aware of it when they did not necessarily  
44 want to be:  
45

46  
47 *I've downloaded, like, other apps in the past to try and do this sort of mood tracker thing. I do*  
48 *quite like the idea of being able to see that, but then, when I actually did it...it, like, would just*  
49 *like, pop up in the middle of the day and it'd be like 'oh how am I feeling?'. And then I'd be like*  
50 *'how am I feeling?... well I'm not feeling terrible...' and I tend to sort of try and ignore that stuff*  
51 *generally when I can.' [017]*  
52  
53

### 54 **Person-specific factors**

#### 55 **Motivation: Facilitators**

56  
57  
58  
59  
60

1  
2  
3 Further to the benefits and the impact of the mood diary, eight participants (80%) also discussed  
4 more general impacts of the app that maintained their motivation to engage with it. One  
5 participant mentioned how the app had had a positive impact on them as they were better able to  
6 manage their self-harm:  
7

8  
9 *'I've definitely been struggling less... just being able to know that I could, like, track it*  
10 *somewhere, like, almost, like, put it in something, um, I thought was quite helpful. Just being*  
11 *able to almost like, confide in the app you know? It definitely stopped [self-harm] being such a*  
12 *regular occurrence' [012]*  
13

14  
15 Six (60%) specified that they were motivated to engage with the app as they felt that it  
16 encouraged positive action that was beneficial for their wellbeing, *'it encourages me to do things*  
17 *that I know will help me, but I just normally can't be assed to do' [010]*. Further to this,  
18 participants appreciated being made aware of numerous *'stress relieving techniques, and*  
19 *knowing there's like, more options out there, say like, I didn't want to do meditation one day,*  
20 *then I know I could find another one on there to help' [011]*. In this way, the app proved to be a  
21 helpful resource for participants who used it to identify new strategies to help manage their  
22 emotions.  
23

24  
25 One specific way in which the app helped reduce urges to self-harm was in helping participants  
26 to regulate their emotions:  
27

28  
29 *'I found it quite helpful...regulating my mood for the rest of the day, 'cause I found that once I*  
30 *acknowledged it on the app and could see that I'd, you know, acknowledged it and was aware of*  
31 *it, I kind of became less likely to, you know, snap at a family member, and stuff like that... Yeah,*  
32 *yeah 'cause like in the past, a lot of like, triggers for self-harm have been frustration related as*  
33 *opposed to kind of like, sadness related....and I imagine that if I hadn't necessarily had that*  
34 *outlet, I would have then become so frustrated I would have been tempted self-harm' [013]*  
35

36  
37 Participants were also motivated to continue using the app as it helped to remind them of  
38 activities that they found joyful, and helped them to realise that these activities could be  
39 beneficial in managing self-harm as well as improving their wellbeing:  
40

41  
42 *'I'd look at, like, the activity suggested and stuff like that and kind of... it would remind me that*  
43 *those things were things I wouldn't necessarily think to do, and that they would work. So I think*  
44 *like one of them was talking about, like going for walks and stuff, and it's like, I know I like walks*  
45 *and I know they distract me, but I never put two and two together and thought that maybe it*  
46 *would be good in that kind of scenario...The next day I went for a walk and kind of felt like*  
47 *absolutely amazing... But yeah, like, so I think that was again one of the other key things is that*  
48 *it made me kind of stop and take note of things that actually do help and make me associate them*  
49 *with, like, self-harm prevention rather than just them being like activities that I like to do...since*  
50 *getting it in the last six weeks, I've gone on quite a few walks that I may not have necessarily*  
51 *gone on if I hadn't thought like oh, hang on a minute, that's something that I could do and enjoy*  
52 *and that I could actually, like knew could have a positive effect on my mental health' [013]*  
53  
54  
55  
56  
57  
58  
59

1  
2  
3 Finally, continued use of the app was associated with learning strategies that work without  
4 necessarily having to have their phone on them:  
5

6  
7 *'Even if I don't have my phone with me, I now have some of those ideas in my head 'cause once*  
8 *you use them, you know, once you've used the app for a bit, like, you can get - It it can help you*  
9 *just get into a routine of, like, when you start to feel a certain way and know what works, uhm,*  
10 *stuff like the ideas on the app and stuff, what works, what doesn't' [010]*  
11

12 This suggests that the app was beneficial in helping participants to develop and maintain longer  
13 term coping strategies that they could use instead of self-harming.  
14

#### 15 **Motivation: Barriers**

16 Despite this, four participants (40%) also discussed the difficulties they faced in being motivated  
17 enough to use the app. Reasons for this included forgetting to use it, low mood hindering their  
18 motivation, being stressed, having low energy, and not believing that anything could help..One  
19 participant emphasised that the lack of external encouragement to engage with the app would  
20 make it harder to be motivated, as *'you have to remember, you have to like, very much like do it*  
21 *for yourself' [017]*  
22  
23

24  
25 Further, three participants (30%) felt that they did not need the app as they did not have urges to  
26 self-harm.  
27

#### 28 **Capability: Facilitators**

29 Participants felt that BlueIce being a smartphone app meant that it was particularly suitable for  
30 university students, who are *'kind of stereotypically always attached to their phone' [13]*, so for  
31 whom it would be particularly accessible and convenient. References were also made to BlueIce  
32 being more *'private' [011]* than person-based support, like counseling, for example.  
33  
34

#### 35 **Opportunity: Facilitators**

36 Nine participants (90%) perceived BlueIce to be subject to fewer barriers of access as other  
37 services or interventions are, allowing more individuals the opportunity to access support.  
38 Barriers to other services discussed include long waiting lists, difficult referral processes, fees,  
39 lack of personalisation, lack of out of hours support' and support being 'scattered' across  
40 resources.  
41  
42

43 *'But obviously compared to things like therapy and stuff, you have it 24/7. So in that way it's so*  
44 *much better than therapy because, you know therapy, you know I, I get like twice a week for like*  
45 *an hour each time' [010]*  
46  
47

48 Six participants (60%) discussed how BlueIce could also serve as a useful adjunct for people  
49 who are in receipt of professional support, by allowing them a space to track their thoughts and  
50 feelings between sessions:  
51

52 *'This could be my diary for example and I can note it down. And then because we can forget stuff*  
53 *and I could forget something significant, and then when I have to therapy session we can talk*  
54  
55  
56  
57  
58  
59  
60

1  
2  
3 *about everything and my feelings on that day, and I think it would support the counseling*  
4 *session.’ [016]*  
5

6  
7 Finally, one participant praised the opportunity to still be able to receive support without  
8 requiring any interaction:  
9

10 *‘I think it might be quite helpful because, I know that there are times for me at least where if I’m*  
11 *not feeling great I don’t like talking to people, but also, like, I don’t exactly want to neglect my*  
12 *health either, so having that option to not have to talk to anyone but still sort of helping yourself*  
13 *in a way is really nice.’ [001]*  
14

### 15 **Opportunity: Barrier**

16 Conversely, four participants (40%) also discussed how they do not perceive BlueIce as a  
17 replacement for professional support, as there are further opportunities for support that the app  
18 does not provide. Three participants (30%) noted how the lack of human interaction is a  
19 downside as they valued input from a mental health professional. One participant explained how  
20 this is important to them as they need firm direction in therapy in order to improve their  
21 wellbeing:  
22

23  
24  
25 *‘What I have with my counselor now you know, sometimes he would say something and I’ll be*  
26 *like... especially with me, with my personality and you know, not being able maybe to take help*  
27 *from other people, or not knowing what’s best for myself, and then someone else telling me what*  
28 *to do... I’d already told him as well, ‘you need to be a bit harsh with me’. I don’t want anyone*  
29 *soft.’ [016]*  
30

31  
32 One participant commented on how they perceived the function of BlueIce to be more relative to  
33 in the moment distractions, whereas therapy is important for *‘getting to the route of the problem,*  
34 *and I think that to get to the route of a problem it needs to be face to face, it needs to be*  
35 *individualised, and you wouldn’t want a computer or something to go through that with you cos*  
36 *then it can get it wrong and that can have consequences and things’ [003]*  
37

## 38 **Discussion**

39  
40 This exploratory study is the first to evaluate the acceptability, safety and preliminary effects of a  
41 smartphone app (BlueIce) for university students who self-harm. Overall, the app was found to  
42 be acceptable and safe, as well as effective in helping participants to manage their self-harm and  
43 promote behaviour beneficial to wellbeing. However, some limitations of the app were also  
44 noted, such as the motivation required to engage with it.  
45  
46

### 47 **Comparison with prior work**

48  
49 Levels of anxiety and depression symptomatology within the sample were higher than have been  
50 found in clinical samples with similar age groups. For example, Bentley et al., (2021) found  
51 mean GAD-7 and PHQ-9 scores of 8.5 and 10.6 respectively, compared to 12.5 and 16.5 in the  
52 current sample. Interestingly, surveys of university students have found scores that are  
53 comparable to those found in non-student clinical populations; Akram et al (2020) reported a  
54 mean GAD-7 score of 9.3 and a PHQ-9 score of 10.1 based on a sample of 1,273 students. This  
55  
56  
57  
58  
59

1  
2  
3 endorses findings that university students are at a significantly heightened risk of struggling with  
4 mental health difficulties [1, 33]. In the baseline measures all participants classed themselves as  
5 either having self-harmed within the past 2 months or as currently having thoughts of self-harm.  
6 Despite this, in the two weeks prior, very few had self-harmed or had thoughts of self-harming.  
7 This raises interesting questions regarding how individuals who self-harm perceive their self-  
8 harm status. Claréus et al [34] investigated this and identified that individuals typically perceive  
9 themselves as having stopped self-harming if they had done so few times within the past month  
10 or year. However, some participants still did identify as someone who self-harms despite not  
11 having self-harmed within the past year. Importantly, it was found that how individuals perceive  
12 their recovery is more important than the time that has elapsed since the last act of self-harm.  
13 This corroborates the importance of asking participants to self-identify their self-harm status,  
14 rather than presuming they no longer self-harm in accordance with a certain time frame.  
15  
16  
17

18 The current sample scored lower on measures of coping self-efficacy than in other studies of  
19 university students who self-harm [30]. It is important to acknowledge the context in which this  
20 research occurred, as the trial period was within a national lockdown due to the COVID-19  
21 pandemic, in which everyone was encouraged to stay at home to stop the spread of the virus.  
22 Contact with anyone outside of the household was restricted. Consequently, many institutions  
23 closed, including universities, and most interaction had to occur in online spaces instead. This  
24 meant that university students were no longer attending in-person lectures, and the participants in  
25 this study were no longer attending in-person counseling sessions. This context may explain  
26 participants' lower coping self-efficacy, as students may have had less access to resources that  
27 positively impacted their abilities to cope, such as social networks [35]. A survey of 576 students  
28 did indeed find that the pandemic negatively impacted students' mood and wellness [36],  
29 suggesting they may have been particularly vulnerable during this time.  
30  
31  
32

33 Despite this sample comprising students who had all disclosed self-harm to a mental health  
34 professional, a quarter of participants in this study indicated that they usually do not tell anybody  
35 when they self-harm. This suggests that, even for this group who have disclosed self-harm to a  
36 mental health professional and volunteered for a research study regarding a self-harm  
37 intervention, discussing self-harm can still be challenging. Importantly, this sample seemed to  
38 struggle more with self-harm urges than self-harm behaviours, with 12 participants indicating  
39 that they had self-harmed either rarely or never within the past two weeks, but with two thirds  
40 indicating that their urges to self-harm were strong. This reinforces the importance of measuring  
41 self-harm urges as well as behaviours, as they can be predictive of future self-harm and can still  
42 be very distressing for the individual [37, 38]. Moreover, a questionnaire completed by 1,296  
43 students found that self-harm thoughts alone are still able to allow the individual relief from  
44 difficult emotions [39].  
45  
46  
47

48 Generally, there was a high level of engagement with the app with several participants using it  
49 frequently, adding personalised content to the app, tracking their mood, and using BlueIce in  
50 moments of distress. High levels of engagement with BlueIce have also been found in previous  
51 studies with adolescents [40]. Despite the app originally being designed with and for adolescents,  
52 this did not seem to deter university students from engaging with it and finding it beneficial.  
53 Participants in this study typically praised the simplicity of the app and enjoyed the design,  
54 although some found the mood diary too simple to capture their experiences; this split in opinion  
55  
56  
57  
58  
59  
60

1  
2  
3 replicates findings from the previous evaluation of the acceptability of BlueIce with university  
4 students [17]. Nonetheless, those who did benefit from the mood diary discussed how it helped  
5 them to manage their emotions by providing an outlet for them through which they could get  
6 some relief from their difficult feelings, as well as being able to identify triggers for different  
7 moods. This mirrors findings from another study with young adults who self-harm, who found  
8 mood tracking via a smartphone app beneficial in managing emotions and identifying triggers  
9 [41]. Participants in the current study also found it helpful being able to reflect on their mood in  
10 difficult moments, as well as more broadly in order to gain perspective and feel more optimistic  
11 by realising that they do have good days as well as bad. These qualitative findings resonate with  
12 the quantitative findings showing an increase in participants perceived self-efficacy in being able  
13 to stop unpleasant thoughts or emotions following the trial period, rated using the coping self-  
14 efficacy scale [29]. It may be that the techniques participants learnt to manage their emotions,  
15 promote positive wellbeing and to cope in alternative ways as opposed to self-harm, as discussed  
16 above, may have contributed to their heightened beliefs in their abilities to stop difficult thoughts  
17 and emotions.  
18  
19  
20

21  
22 Around half of the participants indicated that BlueIce had stopped them from harming  
23 themselves at certain points. While this is important, previous research with university students  
24 with lived experience of self-harm highlighted that relying on a reduction in self-harm  
25 behaviours is not necessarily the best way to measure the success of an intervention [42],  
26 preferring a more holistic and wider perspective that also considers their general wellbeing [43].  
27 In particular, university students who self-harm have emphasised wanting self-harm  
28 interventions to help them to learn more adaptive coping strategies and to address their broader  
29 mental health difficulties that are ‘triggers’ for their self-harm [12]. 80% of participants in the  
30 interviews discussed some positive impact of the app, including helping them to develop longer  
31 term, alternative coping strategies, and encouraging action that was beneficial for their  
32 wellbeing. As mentioned, participants’ perceived abilities to stop unpleasant thoughts and  
33 emotions also improved. Further, participants in this study believed that BlueIce could help  
34 students struggling with a range of mental health difficulties, as well as typical university  
35 stressors such as exams. Overall, this would suggest that BlueIce typically aligned with  
36 university students’ favoured outcomes of interventions. However, one participant did specify  
37 that professional support is necessary for getting to the route of the issue behind their self-harm.  
38 This reinforces the heterogeneity surrounding preferences for support that has been found  
39 previously [12, 44, 45], emphasising the need to ensure university students are able to access a  
40 variety of resources and sources of support.  
41  
42  
43

44  
45 The function that BlueIce could provide was explored, with participants suggesting it could be a  
46 helpful adjunct to counseling that allowed users to log how they had been feeling in between  
47 sessions to relay back to their counselor. Participants also discussed finding it helpful in  
48 moments of distress by reminding them of techniques to manage their emotions or distract  
49 themselves, without the user having to search for techniques themselves. The longer-term impact  
50 was also discussed, with participants commenting on having a better understanding of their  
51 triggers and how to manage their emotions, without even having the app in front of them. This  
52 confirms the perception identified in a previous study investigating the acceptability of BlueIce  
53 with university students, where it was identified as a useful reminder of adaptive coping  
54 strategies in difficult moments, as well as a means of learning ways of processing emotions [17].  
55  
56  
57  
58  
59  
60

1  
2  
3 This also reflects findings with adolescents, who reported that BlueIce helped them to reframe  
4 difficult thoughts and provided a helpful distraction [19].  
5

### 6 7 Limitations

8 Firstly, participants in this study all used the app alongside counseling provided by the university  
9 wellbeing services. As such, it is not possible to directly attribute the improvements in  
10 participants' wellbeing to either the counseling or the app. Similarly, participants were recruited  
11 from one university wellbeing service who had already sought help for their self-harm. These  
12 findings may not be representative of students attending other universities or those who self-  
13 harm but have not sought help. As BlueIce was found to be safe to use, future research should  
14 seek to assess the impact of implementing BlueIce more widely with students in the general  
15 university population.  
16  
17

18 Secondly, this was an exploratory open study with a small number of participants and as such  
19 data is limited and must be interpreted with caution. Future research would benefit from a larger  
20 scale study to determine the effectiveness of BlueIce in this population.  
21  
22

23 Finally, this research occurred during a period of national lockdown due to the COVID-19  
24 pandemic. This could have affected our results which may be lacking temporal validity.  
25  
26

### 27 Conclusion

28 In summary, BlueIce proved to be a safe, acceptable and helpful tool for university students  
29 attending face-to-face mental health services. Following use, participants reported that they had  
30 developed more adaptive coping mechanisms, were better able to identify triggers for self-harm,  
31 and had fewer symptoms of depression and anxiety. This mirrors previous research into the use  
32 of BlueIce among university students, adding further credence to its benefits for this population.  
33  
34

35 Further research is indicated using robust methodologies and appropriately powered cohorts to  
36 investigate these effects further.  
37  
38

### 39 Acknowledgements

40 The authors would like to thank the participants for their contribution to this research.  
41  
42

### 43 Conflict of interests

44 Paul Stallard designed the BlueIce app but receives no financial gain from the app or from this  
45 research. The other authors declare that they have no conflicts of interest.  
46  
47  
48

### 49 References

- 50  
51  
52 1. Swannell SV, Martin GE, Page A, et al. Prevalence of Nonsuicidal Self-Injury in  
53 Nonclinical Samples: Systematic Review, Meta-Analysis and Meta-Regression. *Suicide Life*  
54 *Threat Behav* 2014;44:273–303. <https://doi.org/10.1111/sltb.12070>  
55  
56  
57  
58  
59

2. Taliaferro LA, Muehlenkamp JJ. Risk Factors Associated With Self-injurious Behavior Among a National Sample of Undergraduate College Students. *J Am Coll Health* 2015;63:40–8. <https://doi.org/10.1080/07448481.2014.953166>
3. Griffin K, Twynstra J, Gilliland JA, et al. Correlates of self-harm in university students: A cross-sectional study. *J Am Coll Health* 2021;0:1–8. <https://doi.org/10.1080/07448481.2021.1909049>
4. Chandler A. Narrating the self-injured body. *Med Humanit* 2014;40:111–6. <https://doi.org/10.1136/medhum-2013-010488>
5. Long M. ‘We’re not monsters ... we’re just really sad sometimes.’ hidden self-injury, stigma and help-seeking. *Health Sociol Rev* 2018;27:89–103.
6. Sheehy K, Noureen A, Khaliq A, et al. An examination of the relationship between shame, guilt and self-harm: A systematic review and meta-analysis. *Clin Psychol Rev* 2019;73(101779). <https://doi.org/10.1016/j.cpr.2019.101779>
7. Simone AC, Hamza CA. Examining the disclosure of nonsuicidal self-injury to informal and formal sources: A review of the literature. *Clin Psychol Rev* 2020;82(101907). <https://doi.org/10.1016/j.cpr.2020.101907>
8. Simone AC, Hamza CA. A longitudinal examination of predictors of nonsuicidal self-injury disclosures among university students. *J Clin Psychol* 2021;1(18). <https://doi.org/10.1002/jclp.23277>
9. Staniland L, Hasking P, Boyes M, et al. Stigma and nonsuicidal self-injury: Application of a conceptual framework. *Stigma Health* 2021;6:312–23. <https://doi.org/10.1037/sah0000257>
10. Fitzgerald J, Curtis C. Non-suicidal self-injury in a New Zealand student population: Demographic and self-harm characteristics. *N Z J Psychol* 2017;46:156–63.
11. Whitlock J, Eckenrode J, Silverman D. Self-injurious Behaviors in a College Population. *Pediatrics* 2006;117:1939–48. <https://doi.org/10.1542/peds.2005-2543> PMID: 16740834
12. Cliffe B, Stallard P. University students’ experiences and perceptions of interventions for self-harm. *J Youth Stud* 2022;0:1–15. <https://doi.org/10.1080/13676261.2022.2033187>
13. Topooco N, Fowler LA, Fitzsimmons-Craft EE, et al. Digital interventions to address mental health needs in colleges: Perspectives of student stakeholders. *Internet Interventions*. 2022;28:100528. <https://doi.org/10.1016/j.invent.2022.100528>
14. Lattie EG, Adkins EC, Winkquist N, et al. Digital Mental Health Interventions for Depression, Anxiety, and Enhancement of Psychological Well-Being Among College Students: Systematic Review. *J Med Internet Res* 2019 Jul;21(7). <https://www.jmir.org/2019/7/e12869> <https://doi.org/10.2196/12869>
15. Ponzio S, Morelli D, Kawadler JM, et al. Efficacy of the Digital Therapeutic Mobile App BioBase to Reduce Stress and Improve Mental Well-Being Among University Students: Randomized Controlled Trial. *JMIR mHealth and uHealth* 2020 Apr;8:e17767. <https://doi.org/10.2196/17767>
16. Barnett P, Arundell LL, Saunders R, et al. The efficacy of psychological interventions for the prevention and treatment of mental health disorders in university students: A systematic review



and meta-analysis. *Journal of Affective Disorders*. 2021;280:381–406.

<https://doi.org/10.1016/j.jad.2020.10.060>

17. Cliffe B, Stokes Z, Stallard P. The Acceptability of a Smartphone App (BlueIce) for University Students Who Self-harm. *Arch Suicide Res*. 2022;0:1–17.

<https://doi.org/10.1080/13811118.2021.2022552>

18. Stallard P, Porter J, Grist R. A Smartphone App (BlueIce) for Young People Who Self-Harm: Open Phase 1 Pre-Post Trial. *JMIR MHealth UHealth* 2018;6:e32.

<https://doi.org/10.2196/mhealth.8917>

19. Grist R, Porter J, Stallard P. Acceptability, Use, and Safety of a Mobile Phone App (BlueIce) for Young People Who Self-Harm: Qualitative Study of Service Users' Experience. *JMIR Ment Health* 2018 Feb;5(1). <https://www.ncbi.nlm.nih.gov/pmc/articles/PMC5845106/>

<https://doi.org/10.2196/mental.8779>

20. Stallard P, Porter J, Grist R. Safety, Acceptability, and Use of a Smartphone App, BlueIce, for Young People Who Self-Harm: Protocol for an Open Phase I Trial. *JMIR Res Protoc* 2016;5:e217. <https://doi.org/10.2196/resprot.6525>

21. Craig P, Dieppe P, Macintyre S, et al. Developing and evaluating complex interventions: the new Medical Research Council guidance. *BMJ* 2008 Sep;337.

<https://www.bmj.com/content/337/bmj.a1655> <https://doi.org/10.1136/bmj.a1655>

22. Washburn JJ, Juzwin KR, Styer DM, et al. Measuring the urge to self-injure: Preliminary data from a clinical sample. *Psychiatry Res* 2010;178:540–4.

<https://doi.org/10.1016/j.psychres.2010.05.018>

23. Cloutier PF, Nixon MK. The Ottawa Self-Injury Inventory: A preliminary evaluation. Abstracts to the 12th International Congress European Society for Child and Adolescent Psychiatry. *European Child & Adolescent Psychiatry*. 2003;

24. Spitzer RL, Kroenke K, Williams JBW, et al. A Brief Measure for Assessing Generalized Anxiety Disorder: The GAD-7. *Arch Intern Med*. 2006;166:1092.

<https://doi.org/10.1001/archinte.166.10.1092>

25. Bártolo A, Monteiro S, Pereira A. Factor structure and construct validity of the Generalized Anxiety Disorder 7-item (GAD-7) among Portuguese college students. *Cad Saúde Pública* 2017;33:e00212716. <https://doi.org/10.1590/0102-311x00212716>

26. Farrer LM, Gulliver A, Bennett K, et al. Demographic and psychosocial predictors of major depression and generalised anxiety disorder in Australian university students. *BMC Psychiatry* 2016;16:241. <https://doi.org/10.1186/s12888-016-0961-z>

27. Musiat P, Goldstone P, Tarrrier N. Understanding the acceptability of e-mental health - attitudes and expectations towards computerised self-help treatments for mental health problems. *BMC Psychiatry* 2014;14:109. <https://doi.org/10.1186/1471-244X-14-109>

28. Kroenke K, Spitzer RL, Williams JBW. The PHQ-9. *J Gen Intern Med*. 2001;16:606–13.

<https://doi.org/10.1046/j.1525-1497.2001.016009606.x>

29. Chesney MA, Neilands TB, Chambers DB, et al. A validity and reliability study of the coping self-efficacy scale. *Br J Health Psychol* 2006;11:421–37.

<https://doi.org/10.1348/135910705X53155>

- 1  
2  
3 30. Midkiff MF, Lindsey CR, Meadows EA, et al. The role of coping self-efficacy in emotion  
4 regulation and frequency of NSSI in young adult college students. *Cogent Psychol.*  
5 2018;5:1520437. <https://doi.org/10.1080/23311908.2018.1520437>  
6  
7 31. O'Connor C, Joffe H. Intercoder Reliability in Qualitative Research: Debates and  
8 Practical Guidelines. *Int J Qual Methods* 2020;19:1609406919899220.  
9 <https://doi.org/10.1177/1609406919899220>  
10  
11 32. Liverpool S, Mota CP, Sales CMD, et al. Engaging Children and Young People in Digital  
12 Mental Health Interventions: Systematic Review of Modes of Delivery, Facilitators, and  
13 Barriers. *J Med Internet Res* 2020;22:e16317. <https://doi.org/10.2196/16317>  
14  
15 33. Stallman HM. Psychological distress in university students: A comparison with general  
16 population data. *Australian Psychologist* 2010;45:249–57.  
17 <https://doi.org/10.1080/00050067.2010.482109>  
18  
19 34. Claréus B, Hasking PA, Gray N, et al. Is ceasing self-injury enough? Differences in  
20 psychological health between people reporting behavioral cessation of non-suicidal self-injury  
21 and those who consider themselves to have stopped self-injuring. *J Clin Psychol*  
22 2022;jclp.23409. <https://doi.org/10.1002/jclp.23409>  
23  
24 35. Sahu P. Closure of Universities Due to Coronavirus Disease 2019 (COVID-19): Impact on  
25 Education and Mental Health of Students and Academic Staff. *Cureus* 2020 Apr;12(4).  
26 [https://www.cureus.com/articles/30110-closure-of-universities-due-to-coronavirus-disease-2019-](https://www.cureus.com/articles/30110-closure-of-universities-due-to-coronavirus-disease-2019-covid-19-impact-on-education-and-mental-health-of-students-and-academic-staff)  
27 [covid-19-impact-on-education-and-mental-health-of-students-and-academic-staff](https://www.cureus.com/articles/30110-closure-of-universities-due-to-coronavirus-disease-2019-covid-19-impact-on-education-and-mental-health-of-students-and-academic-staff)  
28 <https://doi.org/10.7759/cureus.7541>  
29  
30  
31 36. Copeland WE, McGinnis E, Bai Y, et al. Impact of COVID-19 Pandemic on College Student  
32 Mental Health and Wellness. *Journal of the American Academy of Child & Adolescent*  
33 *Psychiatry.* 2021;60:134-141.e2. <https://doi.org/10.1016/j.jaac.2020.08.466>  
34  
35  
36 37. Burke TA, Ammerman BA, Hamilton JL, et al. Nonsuicidal self-injury scar concealment  
37 from the self and others. *Journal of Psychiatric Research.* 2020;130:313–20.  
38 <https://doi.org/10.1016/j.jpsychires.2020.07.040>  
39  
40  
41 38. Miller M, Redley M, Wilkinson PO. A Qualitative Study of Understanding Reasons for Self-  
42 Harm in Adolescent Girls. *International Journal of Environmental Research and Public Health*  
43 2021;18:3361. <https://doi.org/10.3390/ijerph18073361>  
44  
45  
46 39. Martin J, Bureau JF, Cloutier P, et al. A Comparison of Invalidating Family Environment  
47 Characteristics Between University Students Engaging in Self-Injurious Thoughts & Actions and  
48 Non-Self-Injuring University Students. *J Youth Adolescence* 2011;40:1477–88.  
49 <https://doi.org/10.1007/s10964-011-9643-9>  
50  
51  
52 40. Muscara F, Ng O, Crossley L, Lu S, et al. The feasibility of using smartphone apps to  
53 manage self-harm and suicidal acts in adolescents admitted to an inpatient mental health ward.  
54 *Digit Health* 2020 Nov;6. <https://www.ncbi.nlm.nih.gov/pmc/articles/PMC7705813/>  
55 <https://doi.org/10.1177/2055207620975315>  
56  
57  
58  
59

- 1  
2  
3 41. Honary M, Bell B, Clinch S, et al. Shaping the Design of Smartphone-Based Interventions  
4 for Self-Harm. *Proceedings of the 2020 CHI Conference on Human Factors in Computing*  
5 *Systems* Honolulu HI USA: ACM; 2020:1–14. <https://dl.acm.org/doi/10.1145/3313831.3376370>  
6  
7  
8 42. Owens C, Fox F, Redwood S, et al. Measuring outcomes in trials of interventions for people  
9 who self-harm: qualitative study of service users' views. *BJPsych Open* 2020 Mar;6(2).  
10 [https://www.cambridge.org/core/journals/bjpsych-open/article/measuring-outcomes-in-trials-of-](https://www.cambridge.org/core/journals/bjpsych-open/article/measuring-outcomes-in-trials-of-interventions-for-people-who-selfharm-qualitative-study-of-service-users-views/00B4C4A51CB7627AEBE960FAB87DCB04)  
11 [interventions-for-people-who-selfharm-qualitative-study-of-service-users-](https://www.cambridge.org/core/journals/bjpsych-open/article/measuring-outcomes-in-trials-of-interventions-for-people-who-selfharm-qualitative-study-of-service-users-views/00B4C4A51CB7627AEBE960FAB87DCB04)  
12 [views/00B4C4A51CB7627AEBE960FAB87DCB04](https://www.cambridge.org/core/journals/bjpsych-open/article/measuring-outcomes-in-trials-of-interventions-for-people-who-selfharm-qualitative-study-of-service-users-views/00B4C4A51CB7627AEBE960FAB87DCB04) <https://doi.org/10.1192/bjo.2019.93>  
13  
14  
15 43. Knowles S, Sharma V, Fortune S, et al. Adapting a codesign process with young people to  
16 prioritize outcomes for a systematic review of interventions to prevent self-harm and suicide.  
17 *Health Expectations* 2022. <https://onlinelibrary.wiley.com/doi/abs/10.1111/hex.13479>  
18 <https://doi.org/10.1111/hex.13479>  
19  
20  
21 44. Carroll R, Metcalfe C, Gunnell D. Hospital Presenting Self-Harm and Risk of Fatal and Non-  
22 Fatal Repetition: Systematic Review and Meta-Analysis. *PLoS One* 2014 Feb;9(2).  
23 <https://www.ncbi.nlm.nih.gov/pmc/articles/PMC3938547/>  
24 <https://doi.org/10.1371/journal.pone.0089944>  
25  
26  
27 45. Hume M, Platt S. Appropriate interventions for the prevention and management of self-harm:  
28 a qualitative exploration of service-users' views. *BMC Public Health* 2007;7:9.  
29 <https://doi.org/10.1186/1471-2458-7-9>  
30  
31  
32  
33  
34  
35  
36  
37  
38  
39  
40  
41  
42  
43  
44  
45  
46  
47  
48  
49  
50  
51  
52  
53  
54  
55  
56  
57  
58  
59  
60

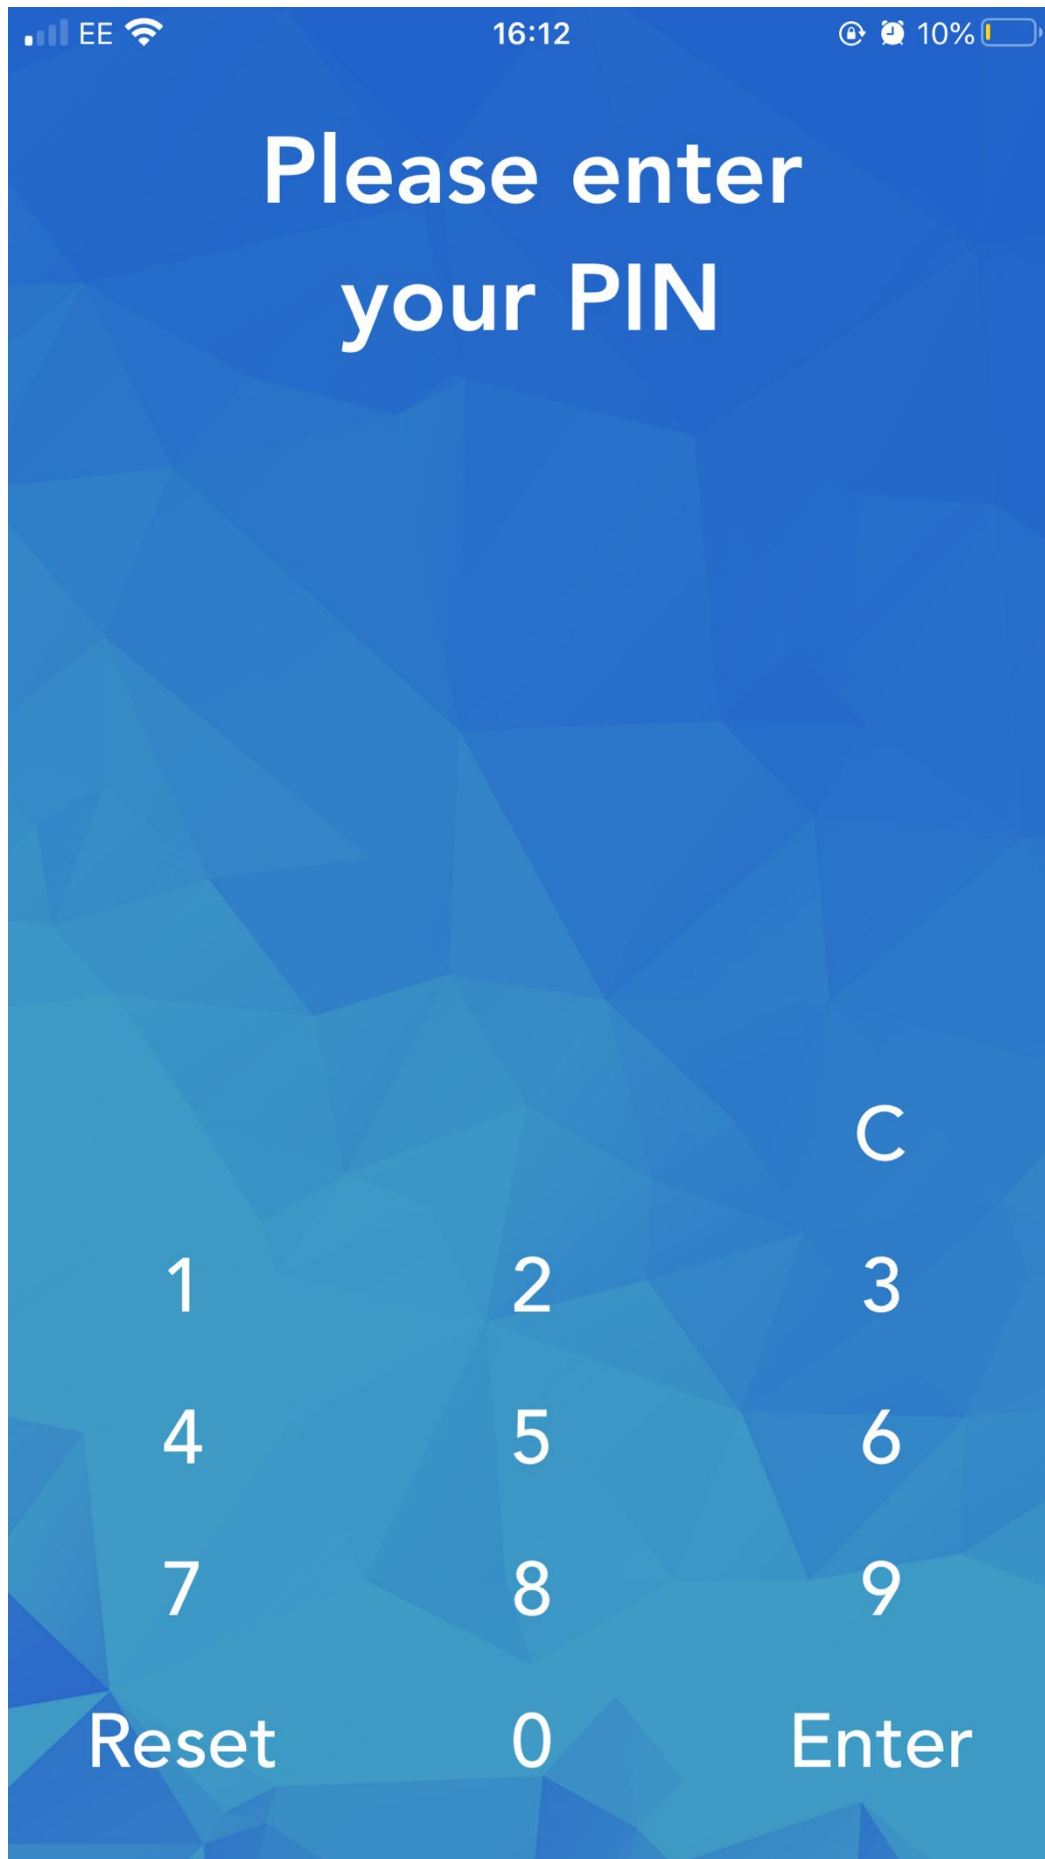

1  
2  
3  
4  
5  
6  
7  
8  
9  
10  
11  
12  
13  
14  
15  
16  
17  
18  
19  
20  
21  
22  
23  
24  
25  
26  
27  
28  
29  
30  
31  
32  
33  
34  
35  
36  
37  
38  
39  
40  
41  
42  
43  
44  
45  
46  
47  
48  
49  
50  
51  
52  
53  
54  
55  
56  
57  
58  
59  
60

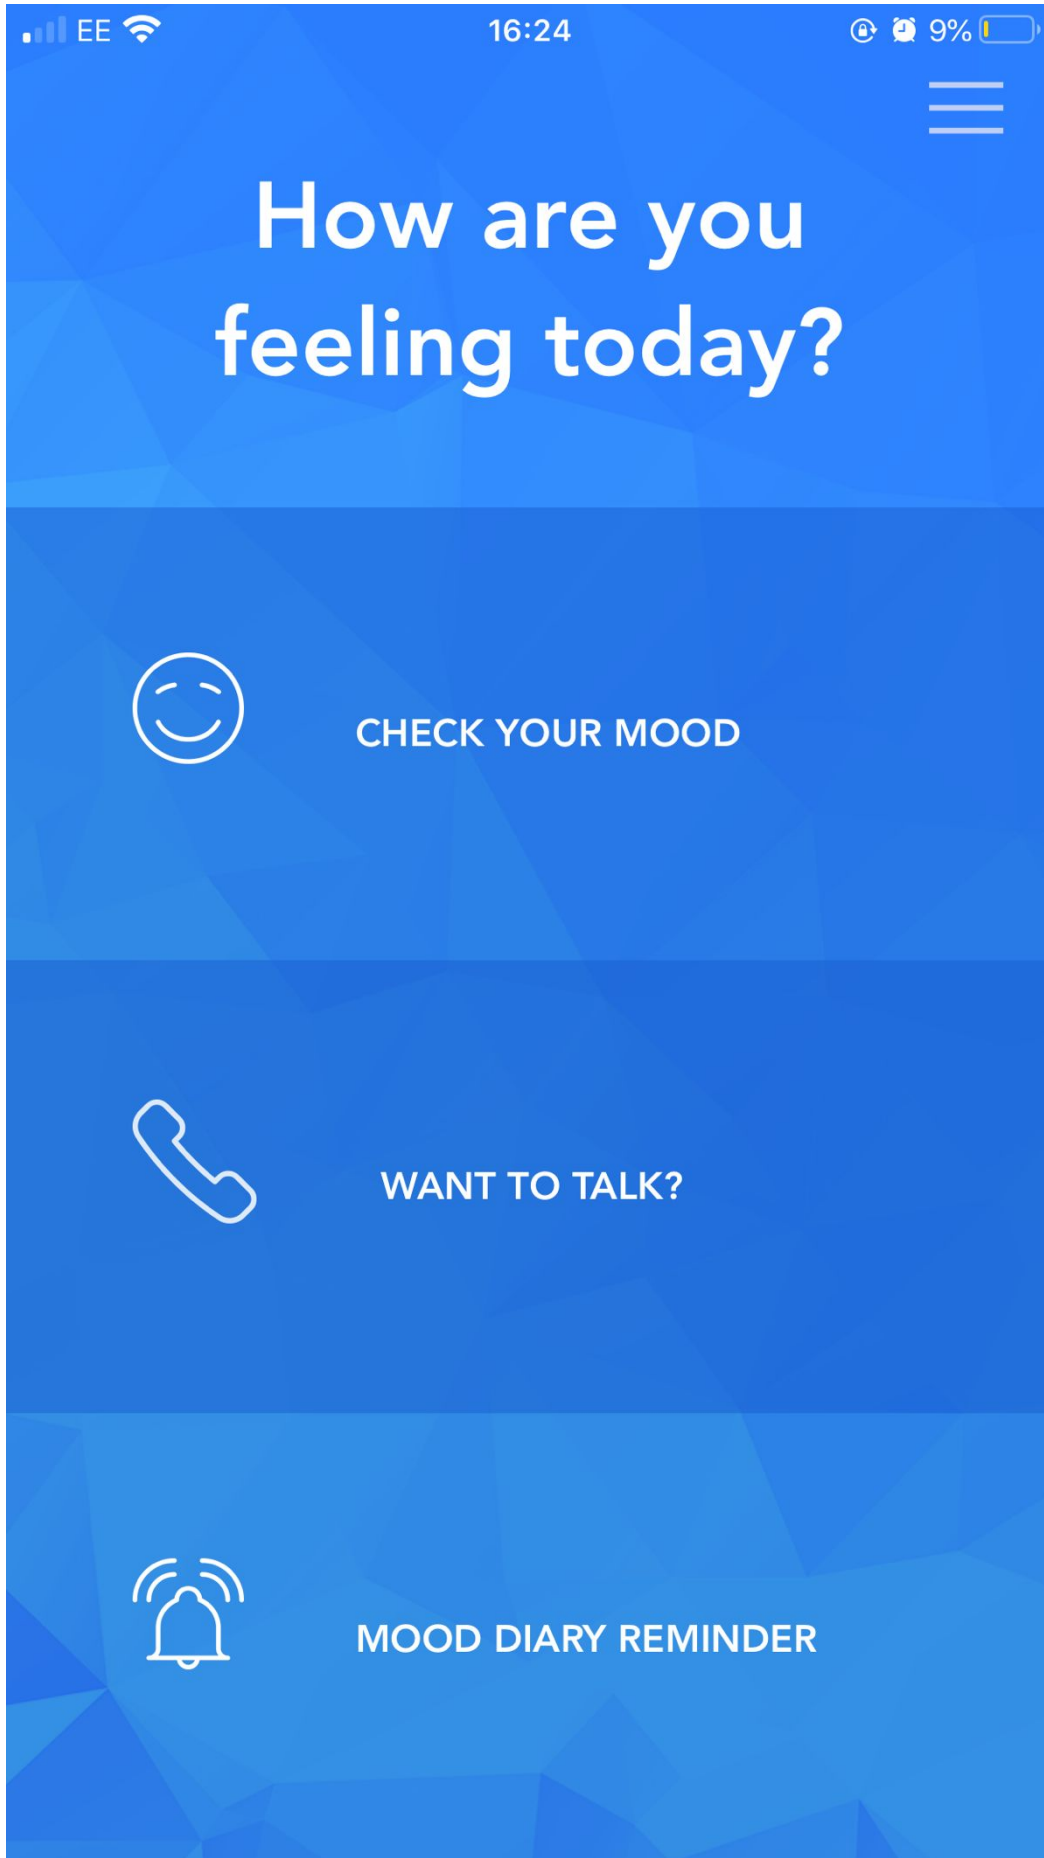

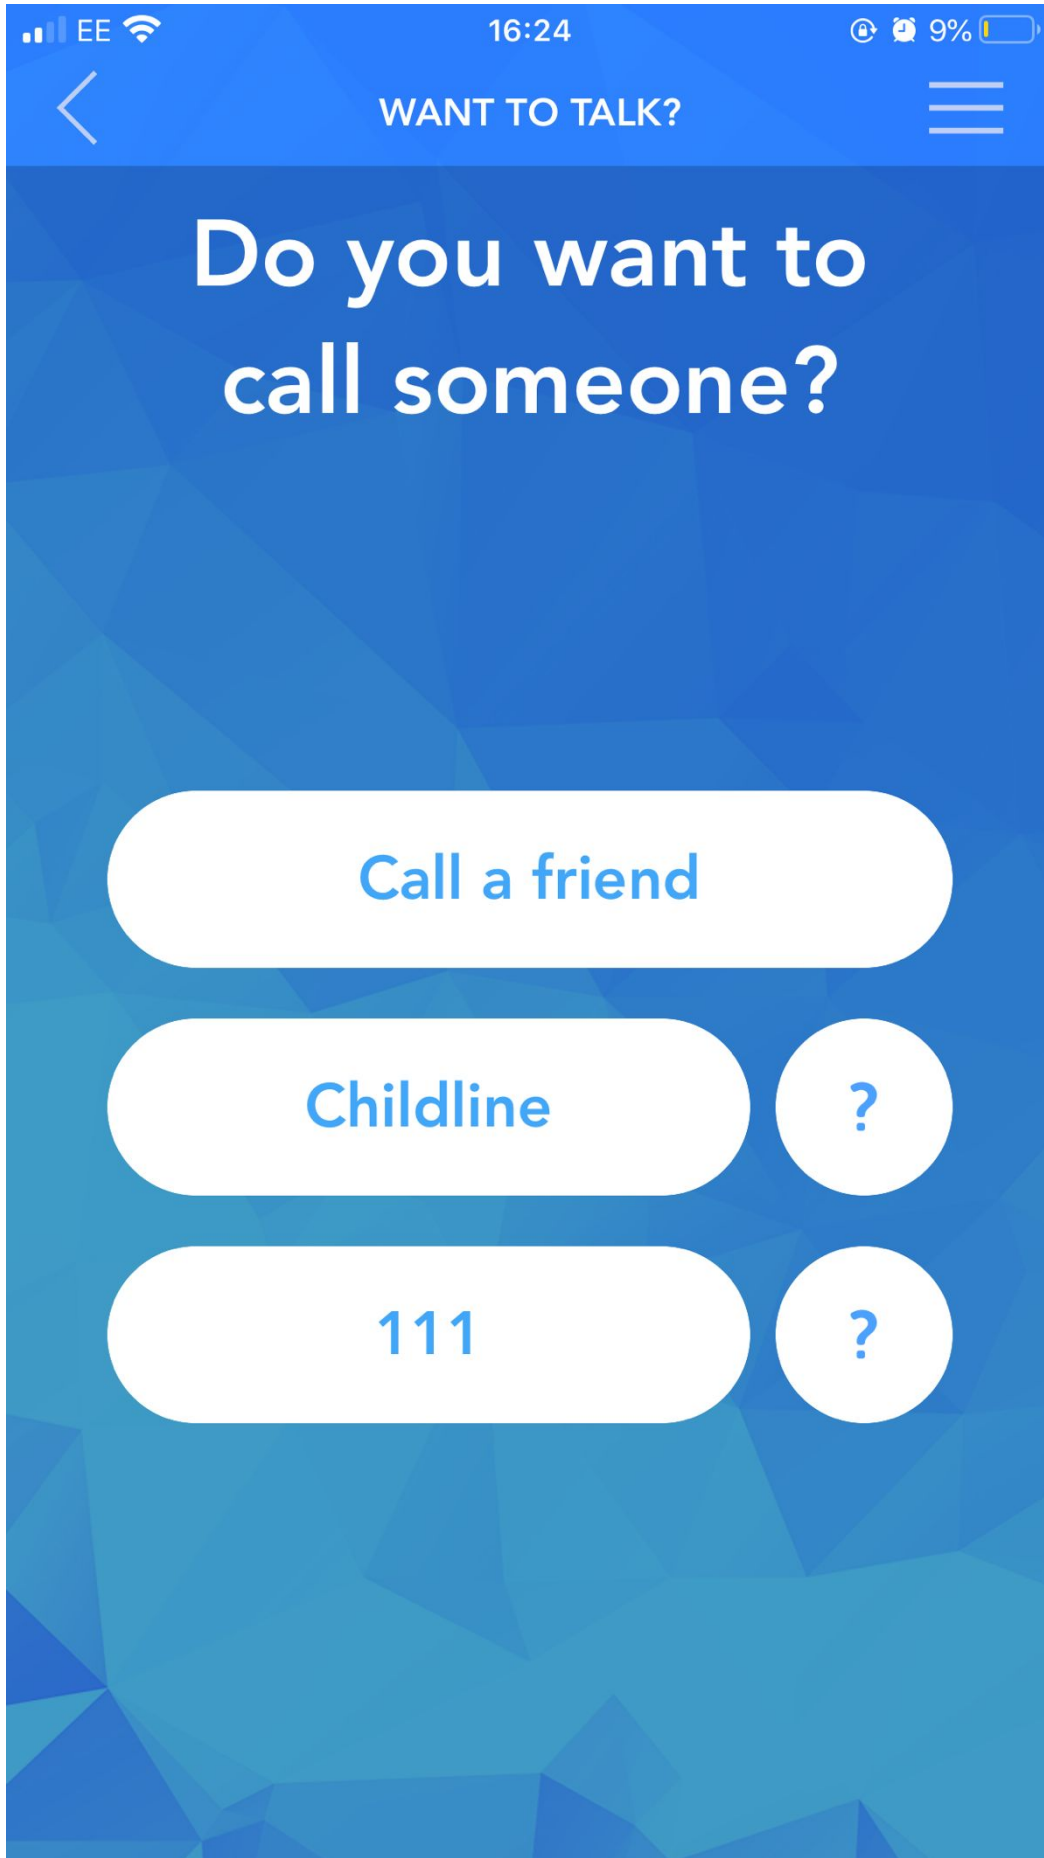

1  
2  
3  
4  
5  
6  
7  
8  
9  
10  
11  
12  
13  
14  
15  
16  
17  
18  
19  
20  
21  
22  
23  
24  
25  
26  
27  
28  
29  
30  
31  
32  
33  
34  
35  
36  
37  
38  
39  
40  
41  
42  
43  
44  
45  
46  
47  
48  
49  
50  
51  
52  
53  
54  
55  
56  
57  
58  
59  
60

1  
2  
3  
4  
5  
6  
7  
8  
9  
10  
11  
12  
13  
14  
15  
16  
17  
18  
19  
20  
21  
22  
23  
24  
25  
26  
27  
28  
29  
30  
31  
32  
33  
34  
35  
36  
37  
38  
39  
40  
41  
42  
43  
44  
45  
46  
47  
48  
49  
50  
51  
52  
53  
54  
55  
56  
57  
58  
59  
60

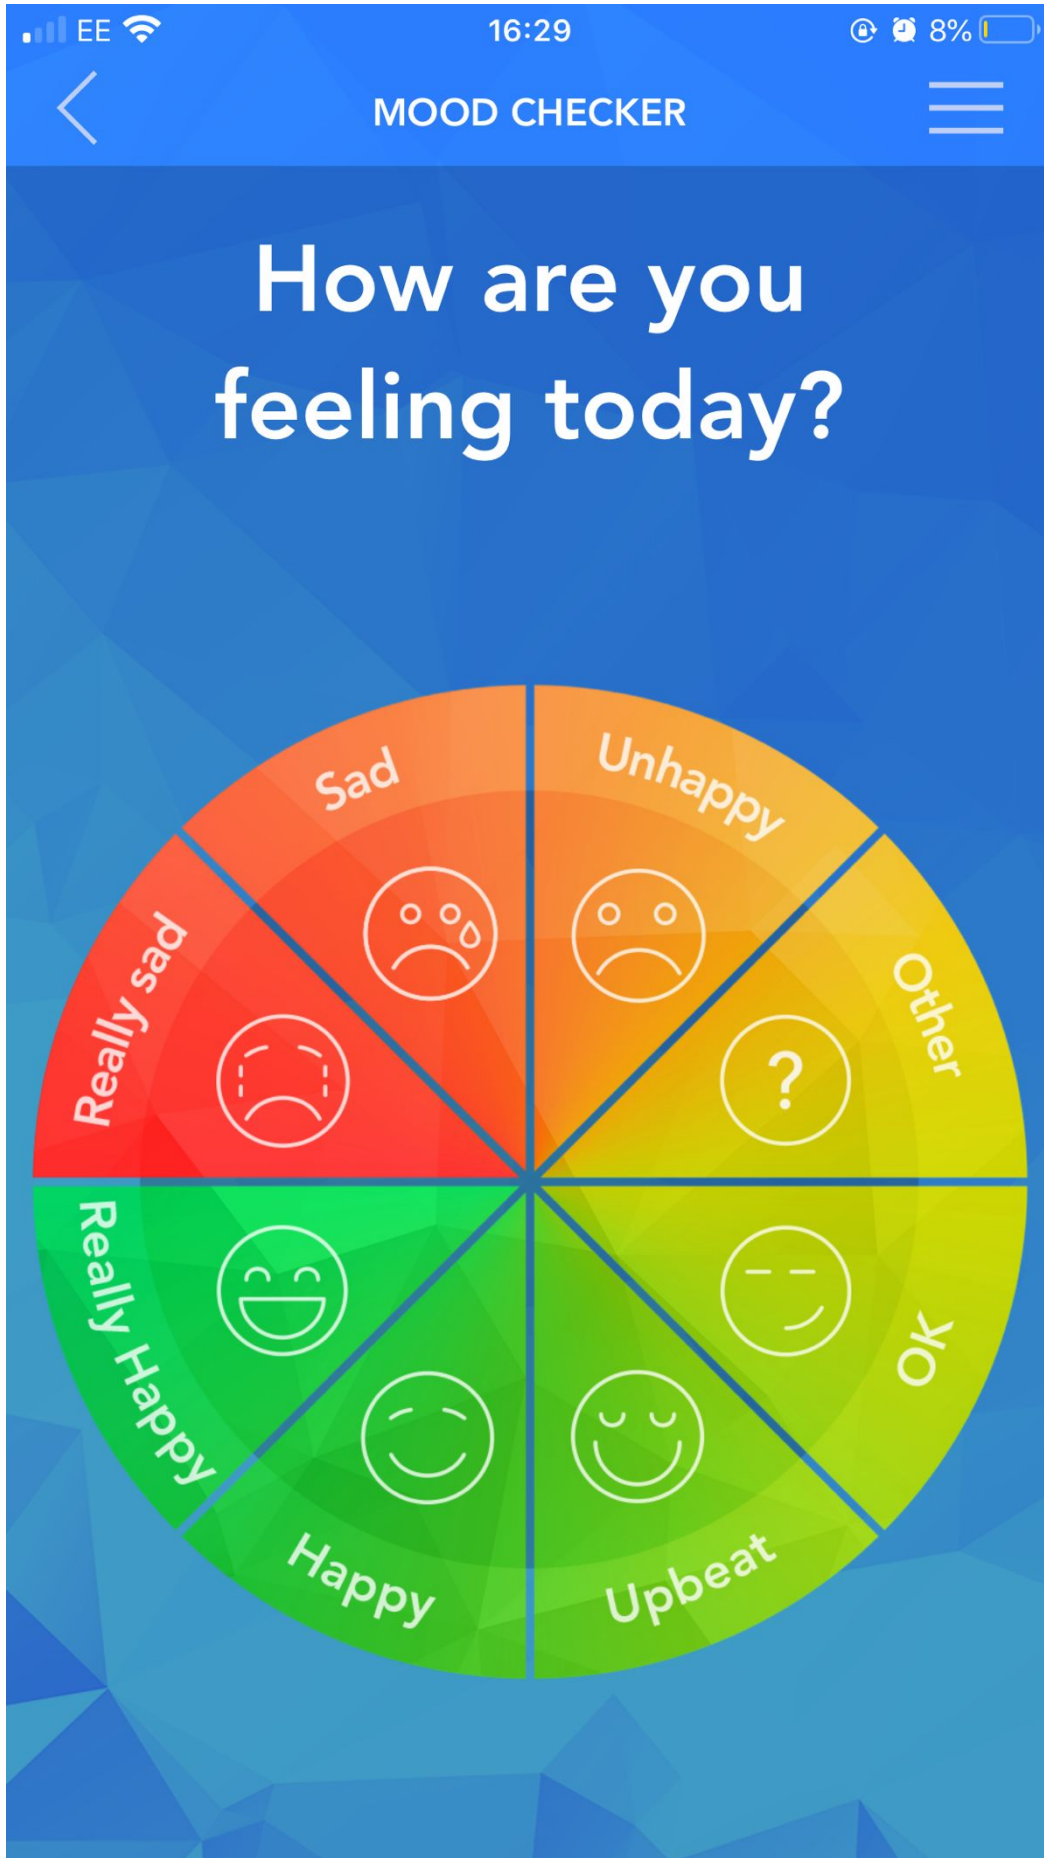

1  
2  
3  
4  
5  
6  
7  
8  
9  
10  
11  
12  
13  
14  
15  
16  
17  
18  
19  
20  
21  
22  
23  
24  
25  
26  
27  
28  
29  
30  
31  
32  
33  
34  
35  
36  
37  
38  
39  
40  
41  
42  
43  
44  
45  
46  
47  
48  
49  
50  
51  
52  
53  
54  
55  
56  
57  
58  
59  
60

The screenshot shows a mobile application interface for a mood diary. At the top, the status bar displays 'EE' network, signal strength, Wi-Fi, time '16:12', and 10% battery. The app title 'MOOD DIARY' is centered in a blue header. Below it, a secondary header shows 'September 2020' with navigation arrows. A calendar grid follows, with days of the week (S, M, T, W, T, F, S) and dates. Three dates are highlighted with red boxes: 17 (Thursday), 26 (Saturday), and 29 (Tuesday). Below the calendar, a mood selection area features a red pill-shaped button with a sad face icon and the text 'Really Sad'. To the right is a blue '+ ✓' icon. Below this, the time '15:48' and '1 note' are shown. The note content is 'Had an argument with my partner' in a large black font, with a light grey rectangular area below it for additional text.



1  
2  
3  
4  
5  
6  
7  
8  
9  
10  
11  
12  
13  
14  
15  
16  
17  
18  
19  
20  
21  
22  
23  
24  
25  
26  
27  
28  
29  
30  
31  
32  
33  
34  
35  
36  
37  
38  
39  
40  
41  
42  
43  
44  
45  
46  
47  
48  
49  
50  
51  
52  
53  
54  
55  
56  
57  
58  
59  
60

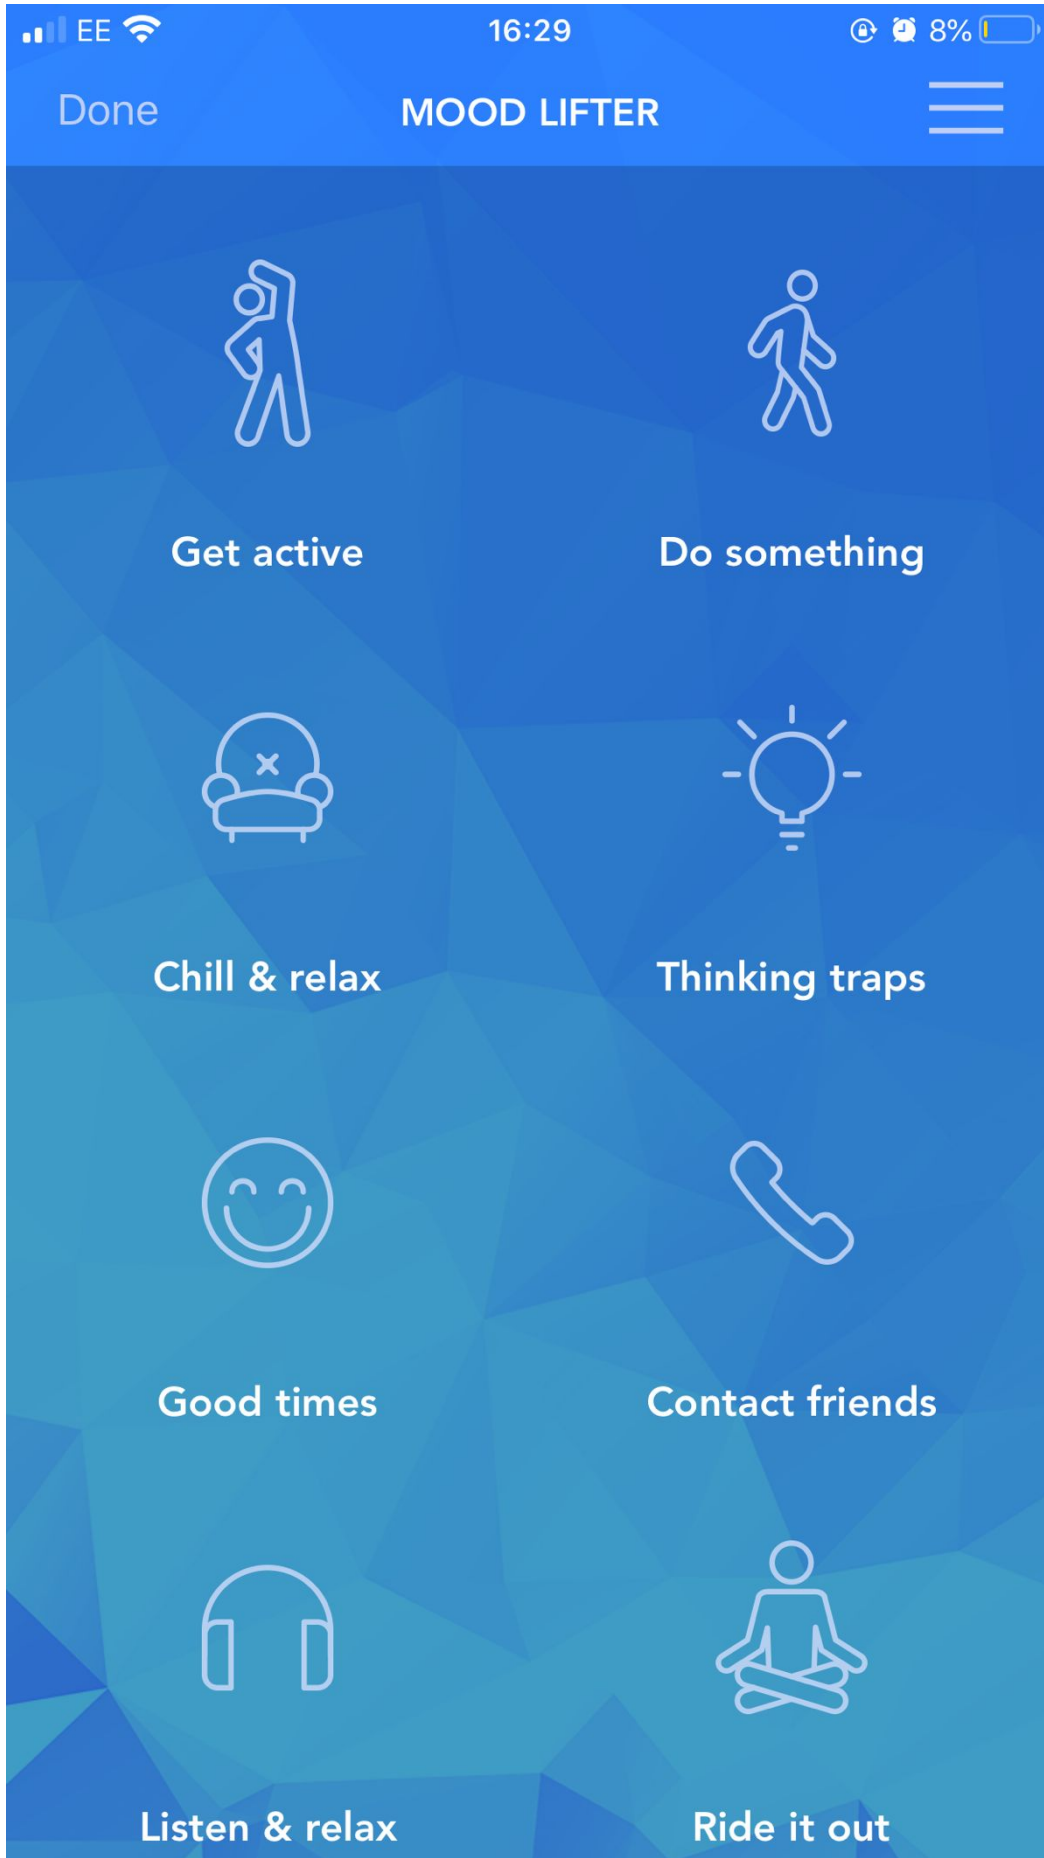

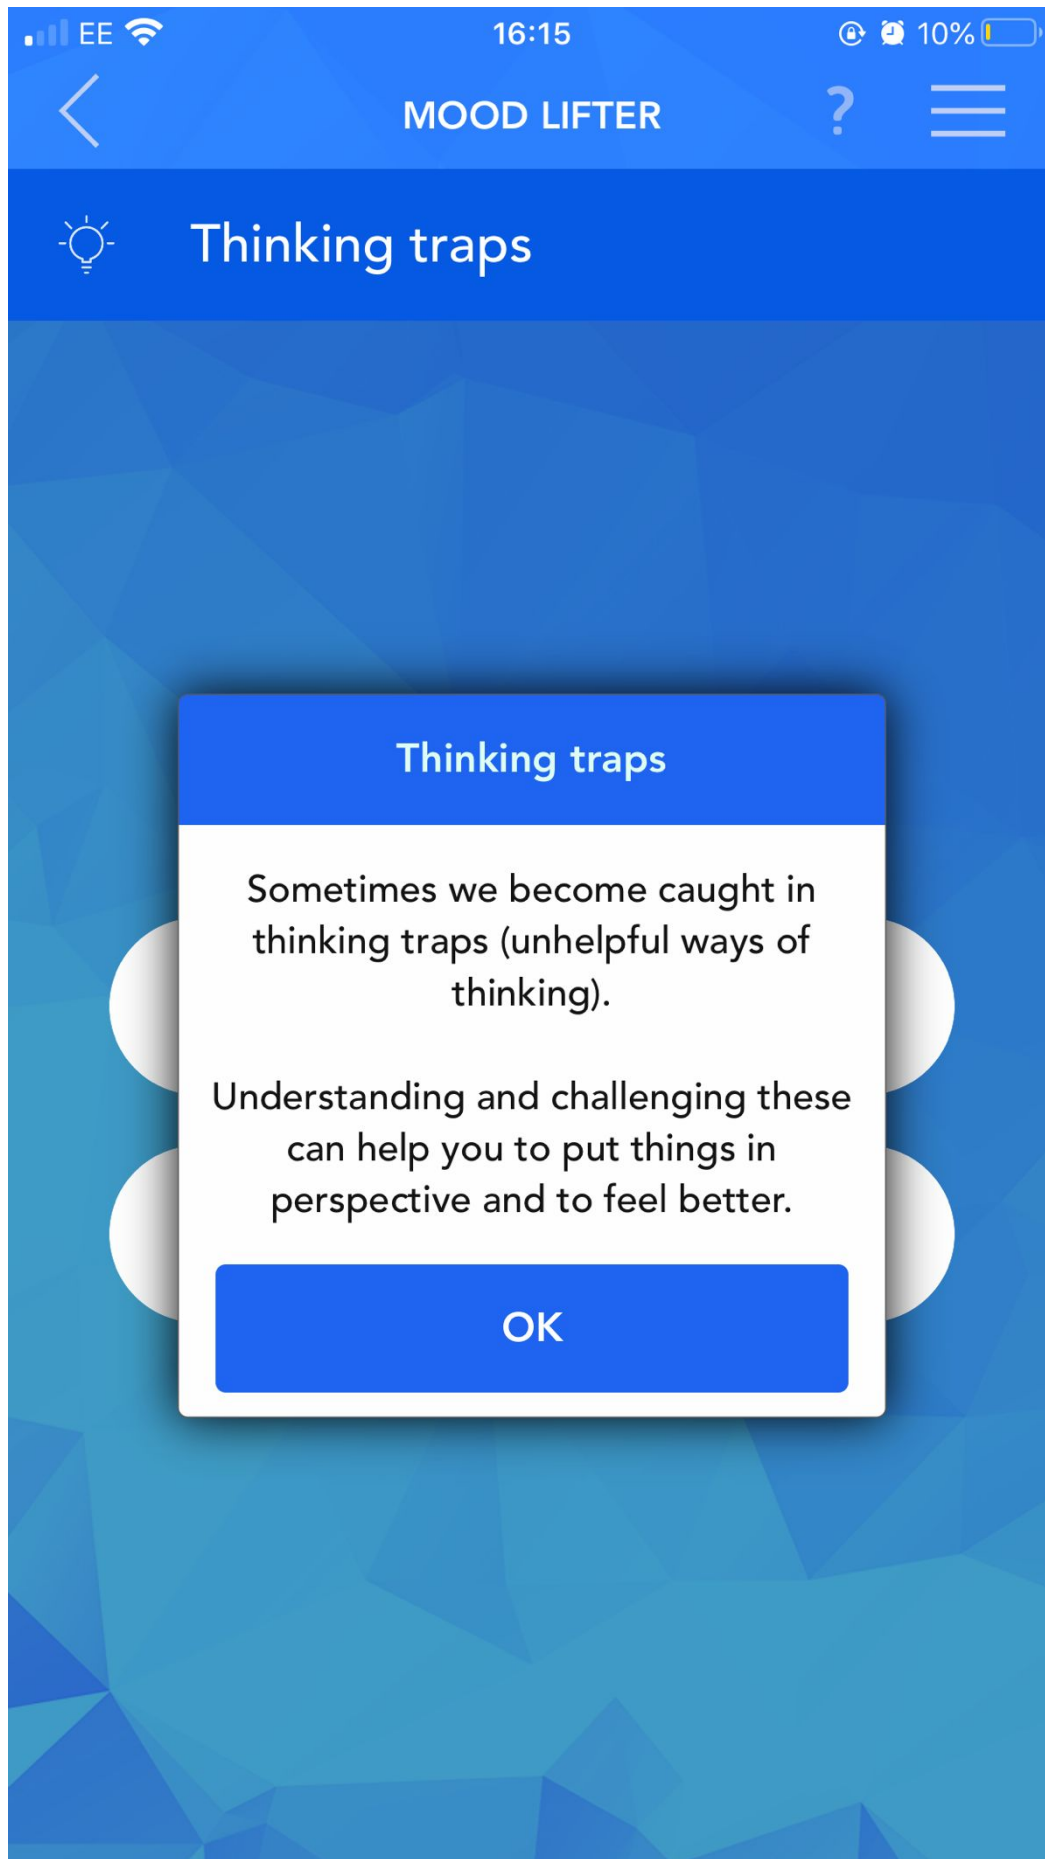

1  
2  
3  
4  
5  
6  
7  
8  
9  
10  
11  
12  
13  
14  
15  
16  
17  
18  
19  
20  
21  
22  
23  
24  
25  
26  
27  
28  
29  
30  
31  
32  
33  
34  
35  
36  
37  
38  
39  
40  
41  
42  
43  
44  
45  
46  
47  
48  
49  
50  
51  
52  
53  
54  
55  
56  
57  
58  
59  
60

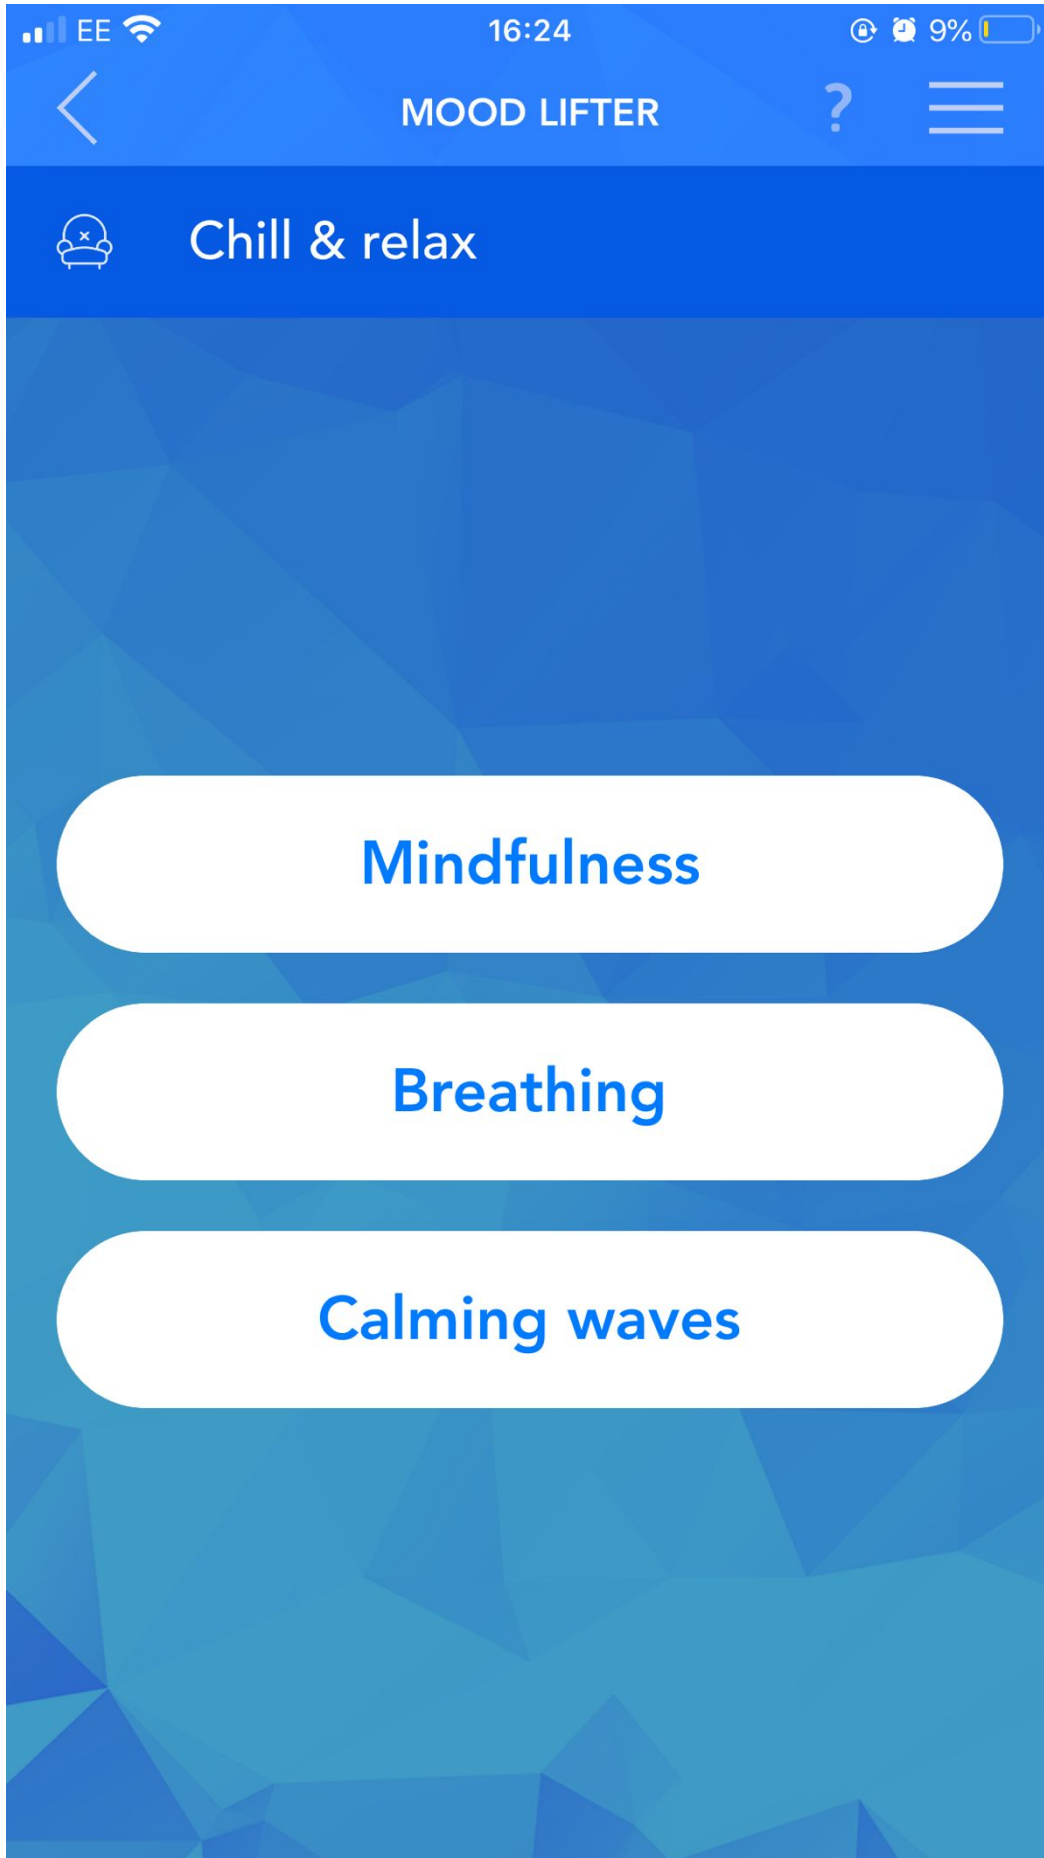

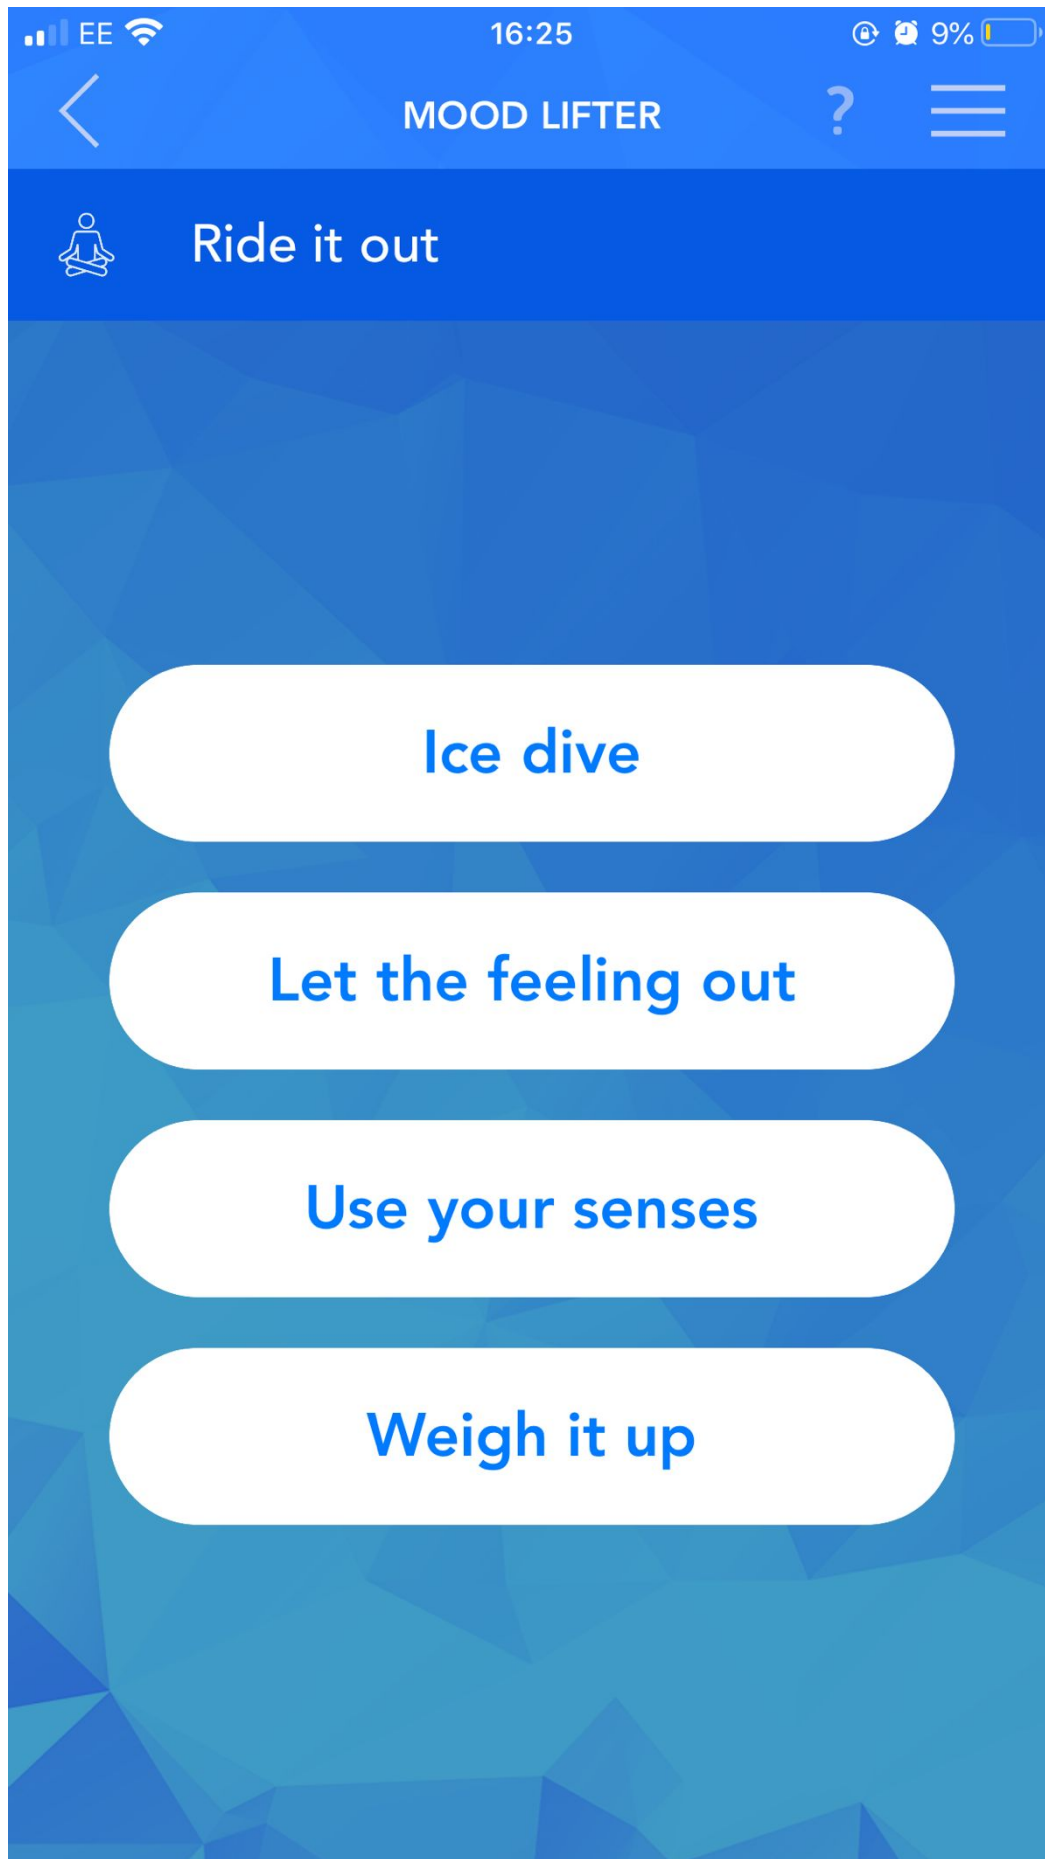

1  
2  
3  
4  
5  
6  
7  
8  
9  
10  
11  
12  
13  
14  
15  
16  
17  
18  
19  
20  
21  
22  
23  
24  
25  
26  
27  
28  
29  
30  
31  
32  
33  
34  
35  
36  
37  
38  
39  
40  
41  
42  
43  
44  
45  
46  
47  
48  
49  
50  
51  
52  
53  
54  
55  
56  
57  
58  
59  
60

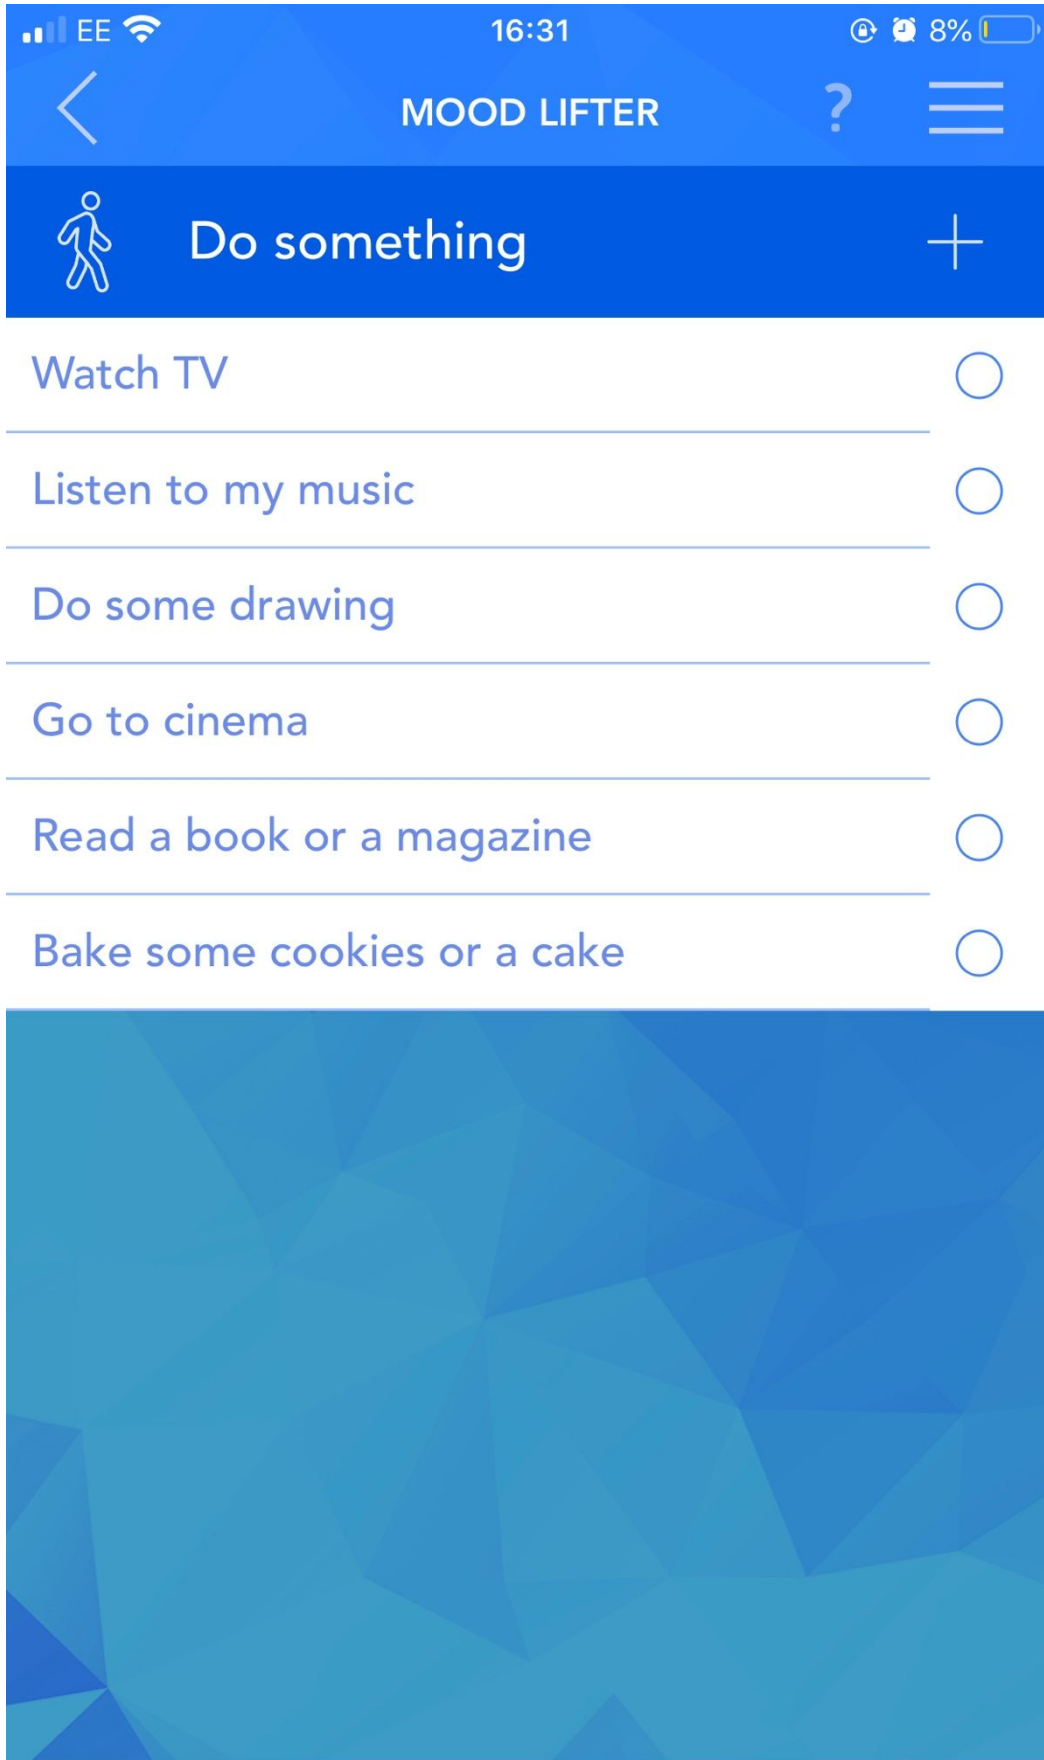

Record what you did

1  
2  
3  
4  
5  
6  
7  
8  
9  
10  
11  
12  
13  
14  
15  
16  
17  
18  
19  
20  
21  
22  
23  
24  
25  
26  
27  
28  
29  
30  
31  
32  
33  
34  
35  
36  
37  
38  
39  
40  
41  
42  
43  
44  
45  
46  
47  
48  
49  
50  
51  
52  
53  
54  
55  
56  
57  
58  
59  
60

VIEW HISTORY

Admin Diary

19/03/2020

**Get active:**  
**Activities:** Walk a mile  
**Notes:** No notes recorded.

17/09/2020

**Get active:**  
**Activities:** Walk a mile  
**Notes:** No notes recorded.

**Do something:**  
**Activities:** Watch TV  
**Notes:** No notes recorded.

13/10/2020

**Do something:**  
**Activities:** Watch TV  
**Notes:** I watched a film and it helped take my mind off things

# Blueelce User Guide

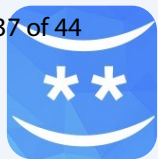

## Login

Set your log in PIN number to a number you will remember. You will be asked for your PIN each time you log on.

If you forget your PIN it can be reset by pressing the reset button. Unfortunately you will lose any notes or items you have saved.

## How are you feeling today?

This is the home page where you can check your mood, talk to helplines or friends, or set your mood diary reminder. You can return to the Home page by tapping the top  left menu and selecting home.

## Mood checker

This is the mood wheel – tap the mood that best describes how you are feeling. You can  add a note to explain why you are feeling like this.

## Mood diary

This is a record of the moods you have entered. You will see a calendar and if you select a day you can see all the moods and notes you entered for that day.

## Mood lifter

This is a toolbox of ideas to help you manage your emotions.

## Add notes

Wherever you see ‘record what you did’ or ‘type your notes here’ tap the screen and a box will appear for you to add your notes. Your saved notes will appear in view history.

## Add items

Wherever you see this button you can add your own items. You can do this in most of the mood lifter sections and in the Mood Diary.

## Delete items

You can delete any items that you have added .  
Apple/iOS: swipe left, tap delete

Android: Hold your finger on the item for two seconds. A box will appear and you can click edit, delete or cancel.

## View history

Tap on the menu button and click view history. Here you can view your notes and all the things you entered that you tried to do on each day.

## Privacy

All data you enter is stored on your phone. It is not transmitted or saved anywhere else unless you chose to download or send a copy

## Download your entries

Tap the top right icon on this page to send a copy of the entries you have made to an email address.

## Information

When you see this button you can tap it to find out more information. .

## Set up mood diary reminder

On the Home screen you can set two reminders to record your mood each day. Set the time and click OK.

You can delete reminders by:

Apple/iOS: tap to open timer and select delete.

Android: hold your finger on the reminder time for 2/3 seconds and select the option to delete.

## Exiting Blueelce

Open the top left menu  and select logout.

## Feedback

To send feedback to the Blueelce team open the top left menu  and tap the feedback button.

This will create an email to the Blueelce team..

 **Blueelce is designed to be used alongside face to face work with a mental health worker.**

If Blueelce isn't helping you then discuss this with your mental health worker.

**The effectiveness and acceptability of a smartphone app (BlueIce) for university students experiencing self-harm thoughts/behaviours.**

**Experience of using BlueIce Questionnaire**

1. Roughly how many times did you use BlueIce over the past 6 weeks?

Once or twice

Up to 5 times

6-12 times (up to once per week)

Couple of times per week

More often (please specify)

2. Did you personalise (i.e. add your own ideas to) the following sections of the mood lifter?

Get Active (physical activities)

Do something (get busy)

Good times (photos)

Listen and relax (music)

Thinking traps (download your head)

Contact friends (add 2/3 friends)

Ride it out (soothing toolbox)

3. What sections of BlueIce did you use the most?

4. Did you set reminders to complete the mood diary?

Yes

No

5. Did you use the mood checker section to record your mood?

Yes



1  
2  
3  
4  No

5  
6  
7 **If NO** – were there any reasons why?

8  
9  
10 \_\_\_\_\_

11  
12 **If YES** – how often did you use it and was it helpful?

13  
14  
15 \_\_\_\_\_

16 6. Did you use BlueIce when you were distressed and felt like harming yourself?

17  
18  Yes

19  
20  
21  No

22  
23  
24  
25 **If No** – Were there any reasons why you didn't use BlueIce (e.g. didn't need to, forgot,  
26 didn't think it would help). **Got to Question 9**

27  
28  
29  
30 **If Yes** – Over the past 12 weeks how many times did you use BlueIce when you were  
31 thinking of harming yourself?

32  
33  Once or twice

34  
35  Up to 5 times

36  
37  6-12 times (up to once per week)

38  
39  Couple of times per week

40  
41  More often (please specify)

42  
43  
44  
45 7. Did BlueIce ever stop you from harming yourself?

46  
47  
48  Yes

49  
50  
51  No

52  
53  
54 **If no**, why do you think it didn't stop you from harming yourself?

55  
56 **If Yes**, how many times did it stop you from harming yourself?

57  Once or twice

58  
59  Up to 5 times

6-12 times (up to once per week)

Couple of times per week

More often (please specify)

8. Which sections of BlueIce helped you most when you were thinking of harming yourself?

9. Were there times when you self-harmed that you didn't use BlueIce

Yes

No

**If Yes**

- What stopped you from using BlueIce (no phone, forgot, feelings too intense)?

10. Were there any parts of BlueIce you found unhelpful, didn't like or didn't use?

11. Please read the statement below and indicate the extent to which you agree or disagree.

|                                             | Strongly Agree | Agree | Not sure | Disagree | Strongly Disagree |
|---------------------------------------------|----------------|-------|----------|----------|-------------------|
| BlueIce was easy to use                     |                |       |          |          |                   |
| BlueIce was helpful                         |                |       |          |          |                   |
| I prefer BlueIce to face to face meetings   |                |       |          |          |                   |
| I would recommend BlueIce to other students |                |       |          |          |                   |

12. Choose a number between 1-10 to show how much your self-harm has improved after using BlueIce?

|   |   |   |   |   |   |   |   |   |    |
|---|---|---|---|---|---|---|---|---|----|
| 1 | 2 | 3 | 4 | 5 | 6 | 7 | 8 | 9 | 10 |
|---|---|---|---|---|---|---|---|---|----|

1  
2  
3 No improvement

Much improvement

4  
5  
6  
7 13. Choose a number between 1-10 to show how much your mental health has improved after using  
8 BlueIce?9  
10  
11 

|   |   |   |   |   |   |   |   |   |    |
|---|---|---|---|---|---|---|---|---|----|
| 1 | 2 | 3 | 4 | 5 | 6 | 7 | 8 | 9 | 10 |
|---|---|---|---|---|---|---|---|---|----|

12 No improvement

Much improvement

13  
14  
15 14. How many stars would you give BlueIce?

- 16
- 
- \*
- 
- 17
- 
- \*\*
- 
- 18
- 
- \*\*\*
- 
- 19
- 
- \*\*\*\*
- 
- 20
- 
- \*\*\*\*\*
- 
- 21
- 
- \*\*\*\*\*
- 
- 22

23  
24  
25 15. Is life different for you now after using BlueIce and, if so, how is it different?26  
27  
28 16. Will you continue to use BlueIce?

- 29
- 
- Yes
- 
- 30
- 
- No
- 
- 31
- 
- Not sure
- 
- 32
- 
- 33
- 
- 34
- 
- 35
- 
- 36
- 
- 37
- 
- 38
- 
- 39
- 
- 40
- 
- 41
- 
- 42
- 
- 43
- 
- 44
- 
- 45
- 
- 46
- 
- 47
- 
- 48
- 
- 49
- 
- 50
- 
- 51
- 
- 52
- 
- 53
- 
- 54
- 
- 55
- 
- 56
- 
- 57
- 
- 58
- 
- 59
- 
- 60

| Umbrella code            | Definition                                                                                                                                                                                                                                                                                                                                                                                        | Examples                                                                                                                                                                                                                                                                                                                                                                                                              |
|--------------------------|---------------------------------------------------------------------------------------------------------------------------------------------------------------------------------------------------------------------------------------------------------------------------------------------------------------------------------------------------------------------------------------------------|-----------------------------------------------------------------------------------------------------------------------------------------------------------------------------------------------------------------------------------------------------------------------------------------------------------------------------------------------------------------------------------------------------------------------|
| User friendly (or not)   | This code encapsulates the general design of BlueIce (i.e. the logo, the colours) as well as being user friendly (i.e. simple, not overwhelming, easy to use). Can also include more general design features e.g. passcode & privacy etc.                                                                                                                                                         | 'Everything looks so happy on the phone. I mean, I like the color. The color is really good. The blue and white'                                                                                                                                                                                                                                                                                                      |
| Engagement               | Participants discussing their engagement (or lack of) with BlueIce, or motivation being a barrier to engage with it / the activities within it. Can also include references to not having the time to use it, or forgetting to use it because they need to be motivated to take those steps to engage. Different to heterogeneity because that's more acknowledging differences.                  | 'for the things with the activity ones, I don't know, umm... for me, it's hard to engage in stuff like that.'<br><br>'I was just lacking the motivation, especially when I'm feeling low '                                                                                                                                                                                                                            |
| Further support required | References to the app lacking an element of interaction, whether it be generally with another human or with a clinician specifically. Can also include general references to BlueIce not being enough and needing more support. Can also include references to it not being 'enough', i.e. it is missing components e.g. psychoeducation or further explanations, not taking enough into account. | 'I think I would need someone there with me and be like, OK, do this and that now really taking me, yeah, through all the steps'                                                                                                                                                                                                                                                                                      |
| Adjunct to therapy       | Participants mentioning that BlueIce could work well alongside / in conjunction with therapy, or it being a useful first step to help get students to seek therapy/ realise they need therapy etc. NOT saying it wouldn't work without therapy and that it has to be alongside therapy.                                                                                                           | 'if it's if the therapist then says like, you know, homework wise or something, I'll always like have a diary. This could be my diary for example and I can note it down. And then because we can forget stuff and I could forget something significant, and then when I have to therapy session we can talk about everything and my feelings on that day and I think it would support yeah the counselling session.' |
| Positive impact          | Positive comments about the mood diary helping students to track their mood, or alter their perspective on how they've been feeling. Also references to the app providing                                                                                                                                                                                                                         | 'I write things down when I'm not feeling well, I write it out, it's kind of like a little bit of relief as well'                                                                                                                                                                                                                                                                                                     |

|                                 |                                                                                                                                                                                                                                                                                                                                                                                                                                                                                                                                   |                                                                                                                                                                                                                                                             |
|---------------------------------|-----------------------------------------------------------------------------------------------------------------------------------------------------------------------------------------------------------------------------------------------------------------------------------------------------------------------------------------------------------------------------------------------------------------------------------------------------------------------------------------------------------------------------------|-------------------------------------------------------------------------------------------------------------------------------------------------------------------------------------------------------------------------------------------------------------|
|                                 | them an outlet / providing relief from negative emotions/emotion regulation, allowing them to vent etc. Also talking about awareness of current mood.                                                                                                                                                                                                                                                                                                                                                                             |                                                                                                                                                                                                                                                             |
| Unhelpful                       | Negative comments about the mood diary / app relating to the red days being unhelpful, not needing to track their mood, or the moods not capturing their emotional ranges.                                                                                                                                                                                                                                                                                                                                                        |                                                                                                                                                                                                                                                             |
| Safe                            | Participants saying that BlueIce is safe to use, it not having risks associated with it or it being helpful for students generally.                                                                                                                                                                                                                                                                                                                                                                                               | 'Ohh no, no risks, no cause it's still like free to use the app whenever and I really didn't see anything on the app that kind of made me feel any negative emotions or anything.'                                                                          |
| Heterogeneity                   | Any references to the individual experience of self-harm or of interventions, including comments about 'personally...' or 'others may be different...', acknowledging the importance of not providing a one size fits all approach.                                                                                                                                                                                                                                                                                               | 'what works for me might not work for another person'<br><br>'I know that some people that would give it a chance, and I think it would be very, you know, helpful for them.'                                                                               |
| Target populations              | Participants saying that BlueIce could be helpful for specific groups of people, i.e., based on their self-harm (e.g. low level or 'new' to SH), mental health status (e.g. people with specific diagnoses like ADHD or dissociation) or demographics (e.g. age, students).                                                                                                                                                                                                                                                       | 'Or maybe for a person even who is like really, you know, a shy person and not so really outgoing. And, you know, maybe doesn't want to talk to therapist or something for those people, maybe, you know, an app would be better option.'                   |
| Barriers to other interventions | Discussion of barriers to other services <b>but</b> only if this relates to BlueIce somehow, e.g., it would help to overcome these barriers like not having a waiting list or something. Include other digital interventions in this as well (helplines, websites, face to face). Accessible also relates to the ease of access of BlueIce both in the first instance (i.e. not having to join a wait list etc) and also in the moment (i.e. out and about). Includes references to it being on a phone which is easily accessed. | 'also for the university, I know there's a long list waiting list for people to get therapy and stuff'<br><br>'because obviously it's an app and we are all just you know on our phones at the moment, phone is like, what would life be without the phone' |

|         |                                                                                                                                                                                                                                                                                                          |                                                                                               |
|---------|----------------------------------------------------------------------------------------------------------------------------------------------------------------------------------------------------------------------------------------------------------------------------------------------------------|-----------------------------------------------------------------------------------------------|
| Toolbox | References to it being a helpful toolbox (e.g. everything in one place). Also comments on the extent of personalisation available of the toolbox, i.e. whether it's enough or not enough. Negative comments specifically about the suggestions in the mood lifter (e.g. going to the cinema or whatever) | 'it's not really personalized as well you know like obviously it's just like a general thing' |
|---------|----------------------------------------------------------------------------------------------------------------------------------------------------------------------------------------------------------------------------------------------------------------------------------------------------------|-----------------------------------------------------------------------------------------------|

For peer review only

| Categories                           | Codes | Barrier                  | Facilitator               |
|--------------------------------------|-------|--------------------------|---------------------------|
| <i>Intervention Specific factors</i> |       |                          |                           |
| <b>Suitability</b>                   |       | Heterogeneity            | Target populations        |
| <b>Usability</b>                     |       | Not user friendly        | User friendly             |
| <b>Acceptability</b>                 |       |                          | Safe                      |
|                                      |       | Unhelpful                |                           |
|                                      |       | Toolbox                  | Personalisation options   |
| <i>Person Specific Factors</i>       |       |                          |                           |
| <b>Motivation</b>                    |       | Engagement barriers      |                           |
|                                      |       |                          | Positive impact           |
| <b>Capability</b>                    |       | Motivation               |                           |
| <b>Opportunity</b>                   |       | Further support required |                           |
|                                      |       |                          | Barriers to other support |
|                                      |       |                          | Adjunct to therapy        |

# BMJ Open

## Is a smartphone application (BlueIce) acceptable and safe for university students who self-harm: an open study

|                                 |                                                                                                                                                                                                                                                                                                              |
|---------------------------------|--------------------------------------------------------------------------------------------------------------------------------------------------------------------------------------------------------------------------------------------------------------------------------------------------------------|
| Journal:                        | <i>BMJ Open</i>                                                                                                                                                                                                                                                                                              |
| Manuscript ID                   | bmjopen-2022-069862.R1                                                                                                                                                                                                                                                                                       |
| Article Type:                   | Original research                                                                                                                                                                                                                                                                                            |
| Date Submitted by the Author:   | 30-Aug-2023                                                                                                                                                                                                                                                                                                  |
| Complete List of Authors:       | Cliffe, Bethany; University of Bath,<br>Moore, Emma; Oxford Health NHS Mental Health Trust, Child and Adolescent Mental Health Services<br>Whittle, Kathryn; Oxford Health NHS Mental Health Trust, Child and Adolescent Mental Health Services<br>Stallard, Paul; University of Bath, Department for Health |
| <b>Primary Subject Heading</b>: | Mental health                                                                                                                                                                                                                                                                                                |
| Secondary Subject Heading:      | Public health, Qualitative research                                                                                                                                                                                                                                                                          |
| Keywords:                       | MENTAL HEALTH, Suicide & self-harm < PSYCHIATRY, Telemedicine < BIOTECHNOLOGY & BIOINFORMATICS                                                                                                                                                                                                               |
|                                 |                                                                                                                                                                                                                                                                                                              |

SCHOLARONE™  
Manuscripts





I, the Submitting Author has the right to grant and does grant on behalf of all authors of the Work (as defined in the below author licence), an exclusive licence and/or a non-exclusive licence for contributions from authors who are: i) UK Crown employees; ii) where BMJ has agreed a CC-BY licence shall apply, and/or iii) in accordance with the terms applicable for US Federal Government officers or employees acting as part of their official duties; on a worldwide, perpetual, irrevocable, royalty-free basis to BMJ Publishing Group Ltd ("BMJ") its licensees and where the relevant Journal is co-owned by BMJ to the co-owners of the Journal, to publish the Work in this journal and any other BMJ products and to exploit all rights, as set out in our [licence](#).

The Submitting Author accepts and understands that any supply made under these terms is made by BMJ to the Submitting Author unless you are acting as an employee on behalf of your employer or a postgraduate student of an affiliated institution which is paying any applicable article publishing charge ("APC") for Open Access articles. Where the Submitting Author wishes to make the Work available on an Open Access basis (and intends to pay the relevant APC), the terms of reuse of such Open Access shall be governed by a Creative Commons licence – details of these licences and which [Creative Commons](#) licence will apply to this Work are set out in our licence referred to above.

Other than as permitted in any relevant BMJ Author's Self Archiving Policies, I confirm this Work has not been accepted for publication elsewhere, is not being considered for publication elsewhere and does not duplicate material already published. I confirm all authors consent to publication of this Work and authorise the granting of this licence.

1  
2  
3  
4  
5 Is a smartphone application (BlueIce) acceptable and safe for university  
6 students who self-harm: an open study  
7  
8  
9  
10

11  
12 Corresponding author:

13 Bethany Cliffe

14 [Bc731@bath.ac.uk](mailto:Bc731@bath.ac.uk)

15 Department for Health

16 University of Bath

17 Claverton Down Campus

18 BA2 7AY

19 Bath

20 UK  
21  
22  
23  
24

25 Emma Moore

26 Child and Adolescent Mental Health Services

27 Oxford Health NHS Trust

28 Bristol

29 UK  
30  
31

32 Kathryn Whittle

33 Child and Adolescent Mental Health Services

34 Oxford Health NHS Trust

35 Bristol

36 UK  
37  
38

39 Paul Stallard

40 Department for Health

41 University of Bath

42 Bath

43 UK  
44  
45

46 Word Count: 8355  
47  
48  
49  
50  
51  
52  
53  
54  
55  
56  
57  
58  
59  
60

## Abstract

Background: Many university students self-harm but few receive support. Smartphone apps have been identified as acceptable sources of support for students who self-harm, but the use of self-harm prevention apps is yet to be explored in this population.

Objective: This study sought to explore the acceptability and safety of a specific app (BlueIce) for university students who self-harm.

Methods: This was an exploratory, mixed methods study with 15 university students attending university wellbeing services with self-harming thoughts and/or behaviours. BlueIce was offered alongside the face-to-face support provided by the wellbeing service. Self-harming thoughts and behaviours, coping self-efficacy, and symptoms of anxiety and depression were measured before and after using BlueIce for 6 weeks. Follow up interviews were also undertaken to explore how students perceived BlueIce in more in depth.

Results: Following app use, there were statistically significant reductions in symptoms of anxiety (baseline M 12.47, SD 4.42; follow-up M 10, SD 4.16)  $t(14) = 2.26, P = .040, d = .58$  and depression (baseline M 16.5, SD 5.17, follow-up M 12.27, SD 3.66)  $t(13) = 5.50, P < .001, d = 1.47$ . Qualitative findings showed participants found BlueIce to be acceptable, safe and helpful, and reported that they were more able to cope with difficult feelings and better understand their self-harm triggers following use of the app.

Conclusion: BlueIce was an acceptable, safe and helpful source of support for university students struggling with self-harm thoughts and/or behaviours. This builds on previous findings with adolescents and suggests that BlueIce could be a particularly acceptable and helpful resource for university students.

### Strengths and limitations

- The first study to evaluate a self-help smartphone app with university students who self-harm
- Qualitative findings were evaluated using a pre-existing framework for evaluating engagement with digital interventions
- Semi-structured interviews provided rich feedback on how students perceived the app.
- Recruitment challenges meant a small sample size for the quantitative analyses.
- Students were only recruited from one university.

## Introduction

### Self-harm among university students

Self-harm, defined broadly in the current study as any intentional act of harm or injury directed towards the self irrespective of motivation [1] is particularly prevalent at universities, with a systematic review finding university students to be twice as likely to self-harm than their non-student peers [2]. In this review, studies measured self-harm on a range of scales, including lifetime, past four weeks, six months, 12 months and 3 years. The higher prevalence of self-harm amongst students may result from the numerous challenges that they face while at university, associated with academic, financial, geographical and social stressors, which leave them more vulnerable to experiencing mental health difficulties [3]. A Canadian study estimated that around a quarter of students will self-harm while at university [4], however, self-harm often goes unreported due to the shame, stigma and misconceptions surrounding it that leaves many students unable to discuss their self-harm [5, 6, 7, 8, 9, 10]. This means that prevalence rates are often underestimated and that very few students who self-harm ever seek or receive professional help [11, 12]. This suggests that alternative options for support should be explored so that students who do not yet feel ready or able to discuss self-harm can still access other forms of support.

In a qualitative study, 25 United Kingdom (UK) university students with lived experience were interviewed about their opinions on support available for self-harm [13]. This study found that whilst some students appreciated the benefits of human connection that came with professional support, several barriers to seeking help were identified [13]. These included long waiting lists for mental health services, not wanting to take up support when they believed others may need it more, worrying about receiving a negative response upon disclosing self-harm, and feeling embarrassed and ashamed of self-harming. This study also explored how students perceive digital interventions, and found that they were viewed positively. In particular, students valued the anonymity, accessibility and convenience they can offer. In addition, students reported that they felt less exposed and inhibited compared to speaking with someone face-to-face, and noted how they always have their phones on them so could access a smartphone-based digital intervention anytime and anywhere [13].

These findings have been corroborated in the USA, with a survey of 479 college/university students showing that around three quarters had used or were using a digital mental health intervention, and high satisfaction rates were reported [14]. Interestingly, 91% of participants in this study indicated that they had experienced barriers to accessing mental health services. This further suggests that digital mental health interventions can bridge the gap between students and mental health support.

Research has also investigated the effectiveness of digital mental health interventions for university students. A systematic review found that digital interventions are effective in reducing symptoms of anxiety and depression, while also improving psychology wellbeing among students [15]. This was also found in a randomised controlled trial with UK university students, where use of a mental health app significantly improved anxiety and depression scores compared to a control group, and that these effects were sustained at follow up [16]. It therefore seems as

1  
2  
3 though digital interventions can be both acceptable to university students and effective in  
4 improving their psychological wellbeing.  
5

6  
7 Given the difficulties students face in seeking professional support for self-harm, coupled with  
8 the perceived advantages of digital support, a smartphone application (app) seems like a valued  
9 option. However, despite these potential benefits, no prior research has been conducted where  
10 university students have used and evaluated a smartphone app specifically developed to help  
11 manage self-harm [17].  
12

### 13 BlueIce

14  
15 A self-harm prevention app (BlueIce) has been evaluated with UK adolescents aged 12-17. Use  
16 of BlueIce was associated with a reduction in symptoms of anxiety and depression, as well as a  
17 reduction in the frequency of self-harm behaviours [18]. Qualitative findings also supported the  
18 app being acceptable, helpful and safe to use [19]. Given the positive findings from this app with  
19 adolescents (up to the age of 18 years), preliminary work subsequently investigated whether it  
20 could be acceptable to UK university students. In interviews, students were shown screenshots of  
21 the app while its functionality was explained to them. Feedback was positive with university  
22 students believing that BlueIce could help them manage their self-harm while also promoting  
23 positive mental wellbeing [20]. Students described how they believed BlueIce could provide  
24 relief in moments of distress by offering them distractions or outlets for their feelings, while also  
25 offering them longer term coping strategies to help manage their emotions.  
26  
27

28  
29 Overall, it seems as though BlueIce is an effective and appealing intervention for self-harm that  
30 could also be beneficial to university students. However, while the perceived acceptability of  
31 BlueIce for university students has been initially explored, this is yet to be corroborated by  
32 students actually using the app. This study aims to build on previous work by exploring the  
33 acceptability and safety of BlueIce for university students using the app alongside attending  
34 university wellbeing services.  
35

## 36 Methods

### 37 Design

38  
39 This was an exploratory, open, mixed-methods study employing pre- and post-intervention  
40 questionnaires and follow-up interviews.  
41  
42

### 43 Patient and public involvement

44  
45 This research was informed by participants' responses in a previous study [13] who gave  
46 guidance on how best to evaluate interventions for self-harm, meaning their expertise contributed  
47 to the choice of measures used here.  
48  
49

### 50 Recruitment

51  
52 Participants were students at one UK University who were recruited via the university's mental  
53 health services. This sample was chosen to ensure that students had support in place should the  
54 app not be helpful, whilst being able to explore the safety of using the app in this population. The  
55 wellbeing service at this university is comprised of trained counsellors, wellbeing advisors and  
56 mental health advisors. They offer various forms of mental health support to students  
57  
58  
59

1  
2  
3 experiencing mild mental health difficulties, or they are able to direct students to more  
4 appropriate external specialist support if required. Help available through the university includes  
5 talking therapy, counselling, workshops, support groups and self-help resources. Typically,  
6 support is available both virtually and in person on the university campus.  
7

8  
9 Wellbeing staff were informed about the study and the intervention by the researcher, and were  
10 asked to highlight the study to any students meeting the inclusion criteria stated below. Posters  
11 advertising the study were placed in the waiting room so students were also able to directly sign  
12 up for the study. Interested students were directed to an online information sheet with space to  
13 enter their email to receive more information about the study. They were then contacted by the  
14 researcher (BC) who discussed the study with them either over a call on Microsoft Teams or over  
15 email.  
16

17  
18 Students were eligible to participate if:

- 19 1) They were currently (within the past two months) experiencing self-harm thoughts or
- 20 behaviours
- 21 2) They were receiving/due to receive counselling or wellbeing support from the
- 22 university services
- 23 3) They were willing to participate
- 24 4) They owned a smartphone running iOS or Android.  
25  
26

27  
28 Current self-harm was defined as within the past two months in line with the definition used  
29 within the K-SADS [21]. This was deemed appropriate to account for the often sporadic and  
30 spontaneous nature of self-harm. There were no exclusion criteria, including no specific  
31 exclusion criteria for participants who may have been at risk of suicide.. Given the broad  
32 definition of self-harm used in this study, differentiations were not made between suicidal or  
33 non-suicidal self-harm, meaning some participants in this study may have been experiencing  
34 suicidal thoughts. Clinical judgement was used on an individual case basis, as all potential  
35 participants were discussed with the university wellbeing service team lead to confirm  
36 suitability. All students who were interested in taking part were deemed suitable by the  
37 wellbeing team lead.  
38  
39

40  
41 An information power approach was taken to determine the adequacy of the sample size for the  
42 qualitative analysis. Given the narrow aim of the study, the specificity of the experiences of the  
43 sample, the previous findings regarding the acceptability of BlueIce, and the in-depth dialogue  
44 within the interviews, a smaller sample of 10 participants was appropriate to address the research  
45 aims [22]. A further 5 participants completed the quantitative questionnaire but did not want to  
46 take part in an interview.  
47

## 48 Intervention

49  
50 BlueIce (<https://www.oxfordhealth.nhs.uk/blueice/>) was co-produced with young people with  
51 lived experience of self-harm, alongside clinical staff and academics. It has therapeutic  
52 grounding in both cognitive behavioural therapy and dialectical behavioural therapy [23] and  
53 was developed in line with guidance from the Medical Research Council [24]. In terms of safety,  
54 the app is pin-protected and no data is shared outside of the app. BlueIce contains a mood diary,  
55 emergency contacts and mood lifting activities that the user can add to and personalise. The  
56  
57  
58  
59

1  
2  
3 activities are informed by common reasons people self-harm and, again, have therapeutic  
4 underpinnings. They include photographs, music, physical activities, guided mindfulness  
5 recordings and breathing exercises, a thought diary, distress tolerance techniques, and phone  
6 numbers of people to contact when at risk of self-harming [23]. Currently, BlueIce is freely  
7 available on a prescription basis within participating child and adolescent mental health services,  
8 with the aim of becoming freely available to download via common app stores once the  
9 outcomes have been established. Please see appendix 1 for screenshots of the app.  
10  
11

## 12 Procedure

13  
14 Data collection occurred between March 2021 and February 2022. Consent forms, baseline and  
15 post-use questionnaire data were collected using the Online Surveys software  
16 (<https://www.onlinesurveys.ac.uk/>). Post-use interviews for participants were conducted using  
17 Microsoft Teams and were recorded using the within-software capabilities. Once consent and  
18 baseline questionnaires were completed, participants were sent a text containing a unique link to  
19 download BlueIce. They were emailed a user guide (please see appendix 2) and a video  
20 demonstrating how to use the app. Participants were then free to use the app as they wished and  
21 were able to keep the app after the study ended. They attended treatment as usual with the  
22 university mental health services during the study but had no other contact with the research  
23 team until the follow-up questionnaires and interview six weeks later.  
24  
25

## 26 Measures

27  
28 *Self-Harm:* To measure self-harm, the Alexian Brothers Urge to Self Injure Scale (ABUSI) [25]  
29 and the Ottawa Self-injury Inventory [26] were administered. The Ottawa self-injury Inventory  
30 includes a subscale about the addictive nature of self-harm, which was removed for the purposes  
31 of this study as it was deemed not to be necessary to address our research aims. These measures  
32 were chosen to capture both self-harm urges and behaviours, as there is evidence to suggest that  
33 thoughts of self-harm can still provide affect regulation [27]. Moreover, it has been found that  
34 even students who do not currently self-harm can still struggle significantly with urges to [13].  
35  
36

37  
38 *Anxiety:* The Generalised Anxiety Disorder-7 (GAD-7) [28] is a brief measure that has shown  
39 good sensitivity at screening for anxiety disorders. Scores of 5 suggest mild anxiety, 10 suggest  
40 moderate anxiety and 15 suggest severe anxiety. It has also been well validated for use with  
41 university students [29, 30, 31].  
42

43  
44 *Depression:* The Patient Health Questionnaire-9 (PHQ-9) [32] is commonly used, has strong  
45 psychometric properties and has previously been used in a sample of UK university students  
46 [32]. A score of 5-9 suggests mild depression, 10-14 moderate depression, 15-19 moderately  
47 severe depression, and a score of 20-27 suggests severe depression.  
48

49  
50 *Coping:* The Coping Self-efficacy scale [33] consists of three subscales: stopping unpleasant  
51 emotions and thoughts, using problem-focused coping, and seeking support from family and  
52 friends. The total maximum score is 260, with greater coping self-efficacy indicated by higher  
53 scores. This measure has good psychometric properties [33] and has previously been used with  
54 university students who self-harm [34].  
55  
56  
57  
58  
59  
60

1  
2  
3 *Acceptability of BlueIce:* Following the six-week intervention period, participants were asked to  
4 complete a questionnaire about the acceptability of BlueIce [18, 19]. This questionnaire was  
5 developed by the researchers and explores engagement with the app, experience of using the app,  
6 and any impact that the app has had. Please see appendix 3.  
7

### 8 9 Interview Schedule

10 Semi-structured interviews were conducted following the trial period that explored participants'  
11 experiences of using BlueIce and any impact they perceived it to have had on their mental  
12 wellbeing. The interviews were semi-structured and lasted between 15 and 45 minutes ( $M =$   
13  $24.6$ ,  $SD = 10.34$ ). The interview schedule was designed by BC and was informed by previous  
14 interview schedules used to determine the acceptability of BlueIce with adolescents [19] and  
15 university students [20] (please see appendix 4). This began with an open question 'what did you  
16 think about BlueIce', with prompt questions asking for feedback on specific elements of the app  
17 used if participants struggled to answer. Questions were also included that asked about any  
18 perceived impact of BlueIce and whether they believed BlueIce could be helpful for other  
19 university students.  
20  
21

### 22 23 Data analysis

24 Descriptive statistics were used to summarise the sample with regards to demographic  
25 characteristics, self-harm characteristics and anxiety and depression symptomatology. Paired  
26 samples t-tests were used to assess pre-post change on quantitative measures.  
27

28  
29 Follow up interviews were analysed using qualitative content analysis [35], to allow for both an  
30 exploration and quantification of the qualitative data. The transcripts were first transcribed  
31 verbatim by BC. All three coders (BC, KW, and EM) then read and re-read the transcripts until  
32 they had become immersed in the data. Three transcripts were picked at random for BC, KW and  
33 EM to code in order to develop a coding frame (please see appendix 5). No more than 10 key  
34 codes in the frame were aimed for, so as not to have more codes than transcripts, but ultimately  
35 11 were settled on [36]. The rest of the transcripts were then independently coded in batches of  
36 two transcripts at a time, after which the three coders met to discuss and make any necessary  
37 adaptations to the coding frame. As there were more than two coders, Cronbach's alpha was used  
38 to measure inter-coder reliability, which suggested good agreement,  $\alpha = .79$  [37].  
39  
40

41 While the codes and the coding frame were developed inductively and independently, BC, KW  
42 and EM identified that the codes aligned with a pre-existing framework of engagement with  
43 digital interventions [38]. The codes were therefore organised relative to the categories within  
44 this framework during analysis (please see appendix 6). The framework is divided into  
45 intervention-specific factors ('suitability', 'usability' and 'acceptability') and person-specific  
46 factors ('motivation', 'capability' and 'opportunity'), with codes exemplifying each category and  
47 barriers and facilitators to each. To operationalise this framework within the context of our  
48 findings, BC, KW and EM developed definitions for each of these categories:  
49  
50

### 51 52 *Intervention-specific factors*

53 Suitability: The suitability (or not) of this intervention with this population specifically, i.e.,  
54 whether it could be feasibly implemented in this population.  
55  
56  
57  
58  
59  
60



1  
2  
3 Usability: Factors affecting the overall experience of using the app (e.g. enjoyment, ease of use)  
4 either positively or negatively to determine whether the app is fit for purpose.  
5

6  
7 Acceptability: Specific factors or features of the intervention (relating to the content and  
8 purpose) that the target population liked or disliked, as well as more general, overall perception  
9 of the app as acceptable or not.  
10

### 11 *Person-specific factors*

12 Motivation: Whether the target population had enough reason to want to use it or not, both  
13 initially and more long term, because of the perceived need for the app or its perceived impact/  
14 helpfulness. This relates to more internal drive factors, such as the extent to which they wanted  
15 to use it.  
16

17  
18 Capability: Whether the individual was able to use it or not and the barriers to this. Whereas  
19 motivation relates to more personal factors, capability relates more to externally influencing  
20 factors, such as being too busy.  
21

22  
23 Opportunity: Factors which improved or reduced participants' opportunities to receive support  
24 (for mental health and/or self-harm) via the app, as well as opportunities that the app provides or  
25 does not provide.  
26

### 27 *Ethical considerations*

28  
29 This study received ethical approval from the University Research Ethics Approval Committee  
30 for Health [EP 20/21 015]. Participants were provided with an information sheet detailing the  
31 study, allowing them a chance to ask any questions before giving informed consent. They were  
32 informed that they could drop out of the study at any time and without giving a reason, and that  
33 they would be able to remove their data from the study prior to anonymisation. Participants were  
34 made aware that their participation would be confidential and that all responses would be  
35 anonymised. Participants received no financial compensation for taking part.  
36  
37

## 38 *Results*

### 39 *Sample characteristics*

40  
41  
42 15 participants completed the baseline and follow-up questionnaires, and 10 participants  
43 completed the follow up interviews. Participants were mostly white (13/15, 87%), undergraduate  
44 (14/15, 93%) females (14/15, 93%) in their first year of study (10/15, 67%). All participants had  
45 self-harmed in the last 2 months (8/15, 53%) or were having thoughts of self-harm (7/15, 47%).  
46 Participants' ages ranged from 18-26 (mean 19.87, SD 2.39). Please see Table 1 for full  
47 participant demographics.  
48  
49

50  
51 Table 1

52 *Demographic characteristics of the sample*  
53  
54  
55  
56  
57  
58  
59  
60

| Demographic (N = 15) |                                       | n (%)    |
|----------------------|---------------------------------------|----------|
| Age                  | 18-20                                 | 11 (73%) |
|                      | 21-23                                 | 3 (20%)  |
|                      | 24+                                   | 1 (7%)   |
| Gender Identity      | Female                                | 14 (93%) |
|                      | Male                                  | 0 (0%)   |
|                      | Non-binary                            | 1 (7%)   |
| Year of Study        | 1                                     | 10 (67%) |
|                      | 2                                     | 1 (7%)   |
|                      | 3                                     | 3 (20%)  |
|                      | 4                                     | 1 (7%)   |
| Degree type          | Undergraduate                         | 14 (93%) |
|                      | Postgraduate                          | 1 (7%)   |
| Ethnicity            | White                                 | 13 (87%) |
|                      | Asian/Asian British                   | 1 (7%)   |
|                      | Black/African/Caribbean/Black British | 1 (7%)   |
| Sexuality            | Heterosexual                          | 8 (53%)  |
|                      | Bisexual                              | 5 (33%)  |

|                  |                                            |         |
|------------------|--------------------------------------------|---------|
|                  | Prefer not to say                          | 1 (7%)  |
|                  | Pansexual                                  | 1 (7%)  |
| Self-harm Status | Current self-harm <sup>a</sup>             | 8 (53%) |
|                  | Current thoughts of self-harm <sup>a</sup> | 7 (47%) |

<sup>a</sup> This is defined as being within the past two months

### *Anxiety, depression and coping*

Scores of the GAD-7 suggested that anxiety symptomatology was high within the sample (mean 12.47, SD 4.42), with many participants (12/15, 80%) experiencing at least moderate anxiety. Similarly, all participants were experiencing symptoms of at least mild depression (mean 16.50, SD 5.17), with a third (5/15, 33%) experiencing severe depression. On average, participants in this study seemed mildly confident in their abilities to cope (mean 92.93, SD 33.37), although this is lower than has been found in other samples of students who self-harm (e.g., mean 140.25, SD 48.26 [30]).

### *Self-harm*

Questions regarding the prevalence of self-harm thoughts and behaviour did not specify a timeframe that they had to have occurred within so that those who had not self-harmed within the last two months were still able to provide insight into what their self-harming behaviours were typically like. Within the two weeks prior to joining the study, most participants had thoughts of self-harming rarely or occasionally (9/15, 60%) and had self-harmed never or rarely (12/15, 80%). However, when they occurred, urges to self-harm were typically rated as strong (10/15, 67%). Participants were divided on how difficult they found it to resist harming themselves in the past week, with half saying they had not found it at all difficult or had found it mildly difficult (8/15, 53%), while four participants had found it very hard or had been unable to resist harming themselves (27%).

On average, participants were aged 15 (SD 2.42) when they first self-harmed, although ages ranged from 10-19. Nearly all participants had last self-harmed within the past two years (14/15, 93%), with one participant not having self-harmed since 2011. Around a quarter of participants reported that they usually never tell anybody if /when they self-harm (4/15, 27%), while the most common sources of support sought were university counsellors (9/15, 60%) (this was expected given that participants were recruited through university wellbeing services) and friend(s) (8/15, 53%). Cutting was the most common method of self-harming among the sample (11/15, 73%), followed by hitting (6/15, 40%), scratching (5/15, 33%), interfering with wound healing (5/15, 33%) and banging head (4/15, 27%). When self-harming, only one participant (1/15, 7%) reported never feeling relief afterwards, and relief typically either lasted between 1-30 minutes (8/15, 53%) or for hours (5/15, 33%). When self-harming, between 1-60 minutes typically elapsed between thinking about it and acting upon it (11/13, 73%). Techniques most used to

distract themselves from self-harming were talking with someone (9/15, 60%), doing anything to keep their hands busy (8/15, 53%) and watching TV (8/15, 53%). On a scale of 0 – 4, participants were moderately motivated to stop self-harming (mean 2.93, SD .80) and felt moderately able to stop self-harming (mean 2.40, SD 1.12). The most common sources of treatment the sample had received were self-help (6/15, 40%) or university counselling (5/15, 33%). The function subscale within the Ottawa Self-injury Inventory determined that students typically self-harmed for internal emotion regulation (mean 12.69, SD 6.36), and were least likely to self-harm for sensation seeking (mean 1.36, SD 1.95). Only one participant (7%) had visited a doctor for their self-harm, and two participants (13%) had made a previous suicide attempt.

## Quantitative Results

### Differences before and after treatment

After the trial period, participants scored significantly lower on symptoms of anxiety as assessed by the GAD7 (mean 10.00, SD 4.16),  $t(14) = 2.26$ ,  $P = .040$ ,  $d = .58$ , and on symptoms of depression assessed by the PHQ 9 (mean 12.47, SD 3.66),  $t(13) = 5.50$ ,  $P < .001$ ,  $d = 1.47$ . Scores on the ABUSI were lower following the trial period (mean 11.07, SD 1.48) compared to before the trial period (mean 13.13, SD 6.66) although this difference was not statistically significant  $t(14) = 1.49$ ,  $P = .16$ ,  $d = .38$ . Similarly, scores on the coping measure were not statistically significantly higher after the trial period, however, scores for the ‘stop unpleasant thoughts and emotions’ subscale were significantly higher (i.e. improved) on post-measures (mean 28.60, SD 15.32) than on pre-measures (mean 21.80, SD 10.27),  $t(14) = -2.36$ ,  $P = .033$ ,  $d = .61$ . No scores on any measures were worse following the intervention period, and no adverse events were reported by wellbeing staff or participants.

### BlueIce Use

Over the six weeks, the median use of BlueIce was between six and 12 times (5/15, 33%), with 3/15 (20%) using it a couple of times a week, every day and at least once a day, respectively. Two participants did not use BlueIce at all (15%), because they forgot to. Of the 13 participants who used the app, 11 (73%) personalised BlueIce by adding their own ideas to different sections of the app. Just over a third (5/13, 39%) set reminders to use the app, but everyone used the mood diary to track their mood. The majority (11/13, 85%) chose to use BlueIce in distressing moments when they felt like harming themselves, and almost half said that it did stop some episodes of self-harm (6/11\*, 55%). Over half said that they definitely would continue to use BlueIce (8/13, 62%) with only one person reporting that they would not (1/13, 8%). On a scale of 0-4, participants rated that they typically found BlueIce easy to use (mean 3.54, SD .52) and helpful (mean 2.47, SD 1.20), and that they would likely recommend to others (mean 2.73, SD 1.16). On the other hand, participants were less sure that they preferred BlueIce to face to face meetings (mean 1.38, SD 1.30). On a scale of 1-10, participants indicated that they had experienced small improvements in their self-harm (mean 4.31, SD 2.50) and mental health (mean 3.46, SD 2.73) since using BlueIce. Out of five, on average participants gave BlueIce 3.46 (SD 1.05) stars.

*\*two participants did not answer this question*

## Qualitative results

Qualitative interviews were completed with 10 participants.

### Intervention-specific factors

#### **Suitability: Facilitators**

Although BlueIce was originally designed for adolescents, most participants felt that it was appropriate for university students. One participant commented that being designed for a younger population may have been beneficial as the app was simple to use:

*'I didn't think it was [designed for adolescents]. It didn't look that way, although, like, I did like how clean and simple it was. I think it stops it being almost, like, distracting, and I liked how clean it looked' [012]*

Two participants (20%) felt that the app would be particularly suitable for students who are more introverted or isolated and who may struggle to seek professional support:

*'Or maybe for a person even who is, like, really, you know, a shy person and not so really outgoing. And, you know, maybe doesn't want to talk to a therapist or something, For those people, maybe, you know, an app would be better option.' [016]*

Finally, four participants (40%) discussed how the scope of BlueIce seemed to extend beyond self-harm, as *'to me it seems like the kind of thing that most people would probably find useful' [008]*. Participants specified that it would also be suitable for students who are struggling more generally, for example with exam stress, anxiety, or frustration:

*'I think this could definitely be used by people who are dissociating or having other issues that aren't self-harm, like feeling really anxious for example, feeling really down, just not knowing what to do or feeling really overwhelmed, I think it could be used for a lot of different things' [006]*

#### **Suitability: Barriers**

Conversely, three participants (30%) also discussed how the intervention may not be suitable for everybody, as people have different experiences of self-harm and different needs from support:

*'It seemed like a good app, but not so suited to the way I sort of deal with things... I sort of tried out some of the mood...what is it called? The... the ones where it's like methods of coping? I tried out some of those. And, I like, I just didn't find any of them sort of suited to me, like I've still not worked out any particular ways of dealing with it myself. So I think, like, yeah, I think it's good, just not for me.' [008]*

This also exemplifies how there tended to be a recognition among participants that, even if BlueIce may not have been particularly suitable for them, they could see how it could be of value to others.

### **Usability: Facilitators**

Participants typically found the app simple and easy to use. They appreciated it giving them prompts and guiding them through the app pages, as they noted how moments of distress can be overwhelming, making it difficult to organise thoughts independently:

*'I really like the pages where you can answer questions and, like, the buttons because I hate, like, speaking. Like, in those moments I hate speaking. I hate like... I find it really hard sometimes, I can like, you know, write down my thoughts on, like, that page. But like, a lot of the time I just can't, like, I'm too overwhelmed or, like, I just, yeah, I don't know what I'm thinking, but having the questions or the little buttons like, I love that... because it just helps me so much be able to find what I need... So being given prompts, um, is really, yeah, I really, really like that.'* [010]

The simplicity of the app design was highlighted by 7 participants, with references being made to it not being overwhelming with too many options. The aesthetics of the app were also praised by five participants (50%), who enjoyed the colour scheme, the icons, the inconspicuous nature of the app, the format, and the logo.

*'Everything looks so happy on the phone. I mean, I like the color. The color is really good. The blue and white.... And I think also, yeah, when I was doing it then, when the light is off in the night in bed, it had like this, I don't know, dreamy, calm effect of me, like a cloud or, I don't know, yeah, something like that. It does something to you, just the color and the design.'* [016]

Four participants (40%) also felt that the app was private, and appreciated having the passcode so that nobody but them could access it. This helped users to feel more confident being open with the app, knowing that their thoughts and feelings would be kept secure.

*'I would say the pin password that you set up, that you need to access the app, it was helpful and it create a sense of privacy and especially, I mean less so now because obviously I don't live at home, but there's part of me that likes the idea of, you know, say, if ever anyone was looking over my phone or trying to access my phone knowing that, you know, I wouldn't have to... you know, there'd be preventions, I won't have to feel like I was at risk of someone opening it up and seeing everything.'* [013]

Finally, the option to set reminders to use the app was praised by 3 participants (30%), including one participant who did not use the app frequently, as they acknowledged that it would have helped them to engage more with the app if they had done so.

### **Usability: Barriers**

While the majority of participants responded positively to the app design and content, one participant did not like the colours and would have preferred pastel colours that would have felt more soothing for them:

*'Just generally thinking about the colour scheme (laughter) maybe more soothing colours, I know it's called BlueIce but maybe the calm of a slightly paler blue... I think a pastel kind of thing would be better'* [003]

1  
2  
3  
4 The other barriers to usability identified by one participant was that the music section within  
5 BlueIce did not link with Spotify, but only Apple Music or music saved on the user's phone, and  
6 that they were not able to select more than one photo at a time to upload to the 'good times'  
7 section.  
8

9  
10 **Acceptability: Facilitators**

11 Further to BlueIce being perceived as suitable and usable, participants also discussed how it was  
12 acceptable and safe to use. Four participants specifically discussed how they do not perceive any  
13 risks to BlueIce being widely used, as they *'really didn't see anything on the app that kind of*  
14 *made me feel any negative emotions or anything.'* [016]  
15

16  
17 One participant elaborated on how they were initially concerned that having an app for self-harm  
18 on their phone could be triggering and make them more likely to self-harm, but that they were  
19 glad that this was not the case:  
20

21 *'There was part of me that was a little bit nervous that having the app would make me focus*  
22 *more on self-harm and so therefore maybe, you know, like it would be in the forefront of my head*  
23 *because I'd be seeing the app on my phone everyday... but that didn't happen which was great, I*  
24 *think partly because the app itself is quite innocuous on my phone... it's not glaring at you that*  
25 *it's for self-harm.'* [013]  
26  
27

28 Participants commented on the specific features within the app that they found helpful, for  
29 example the toolbox of mood lifting activities, as having these ideas suggested to them made it  
30 easier to find an alternative way of coping in the moment, rather than using self-harm, as the app  
31 helped them to remember other things they can do instead:  
32  
33

34 *I think in the moment you can kind of, like, forget what you can do. I definitely always, like, don't*  
35 *know what to do, which means it [self-harm] becomes the only option, so just, like, being able to*  
36 *see in front of me that, like, there are things I can do to help, it just makes it easier.'* [012]  
37  
38

39 Another benefit of the toolbox that was highlighted was the option to personalise it by adding the  
40 users own ideas to the different sections, as well as making notes of what they tried and whether  
41 it worked or not. Three participants (30%) discussed how this helped the app feel more tailored  
42 to them and to feel less impersonal.  
43

44 Importantly, over half of participants (7/10, 70%) specifically mentioned the mood diary as  
45 being a positive feature of the app, as it meant that they were able to track how they had been  
46 feeling over previous days. Participants commented how this helped them to feel more aware of  
47 their mood and the reasons behind it:  
48  
49

50 *'I like knowing what helps you, like if you need a break, what makes you, like, happy and like,*  
51 *looking back on times when you've been feeling, like, your best. But also knowing and*  
52 *understanding, like, when you're struggling, like, why that might be. I think just writing it down*  
53 *can definitely help'* [012]  
54  
55  
56  
57  
58  
59  
60

1  
2  
3 Further to helping users' to understand their moods and what mediates them, participants also  
4 discussed how the mood diary helped change their perspective, by helping them to acknowledge  
5 their good days as well as their bad:  
6

7  
8 *'I also noticed something when I checked the calendar because, obviously I can see the color*  
9 *codes right, and I felt happy seeing, for example, three or four green ones instead of seeing like,*  
10 *you know, a red and orange and stuff like that. Yeah, I felt like this also had an impact on then*  
11 *how I felt when I saw it. You know, I was like, 'ohh actually I do have good days. My life is not*  
12 *only like, you know, so stressful and bad' because I can see all the green color.'* [016]  
13

14  
15 Further to the mood diary helping users to be aware of their mood and improving their  
16 perspective, three participants (30%) also noted how it provided a useful outlet for them that  
17 offered some relief from their difficult emotions:  
18

19  
20 *'I think it was great for kind of like, when I didn't feel well for just, putting like, you know, notes*  
21 *down about like, my emotions, what I'm feeling...I just noticed that, kind of, when I write things*  
22 *down when I'm not feeling well, I write it out, it's kind of like a little bit of relief as well'* [016]  
23

#### 24 **Acceptability: Barriers**

25 Despite the mostly positive perception of the mood diary, one of the barriers to acceptability  
26 discussed by four participants was the mood diary being oversimplified. While some participants  
27 enjoyed the simplicity of the app, others felt that the spectrum of emotions available on the mood  
28 diary did not capture their range of experiences, and that the 'other' option was not sufficient:  
29

30  
31 *'I guess sometimes the mood tracker, just because it only has emotions on one spectrum, so it's*  
32 *either just happy or sad. Even though there was an 'other' option, you could change the words*  
33 *but you couldn't change the colour of the, I dunno what you'd call it, but you can't change the*  
34 *colour of the thing'* [001]  
35

36  
37 Another participant liked the idea of using a mood diary but found that, upon actually using it,  
38 that the reminders to track their mood made them more aware of it when they did not necessarily  
39 want to be:  
40

41  
42 *'I've downloaded, like, other apps in the past to try and do this sort of mood tracker thing. I do*  
43 *quite like the idea of being able to see that, but then, when I actually did it...it, like, would just*  
44 *like, pop up in the middle of the day and it'd be like 'oh how am I feeling?'. And then I'd be like*  
45 *'how am I feeling?... well I'm not feeling terrible...' and I tend to sort of try and ignore that stuff*  
46 *generally when I can.'* [017]  
47

#### 48 **Person-specific factors**

##### 49 **Motivation: Facilitators**

50 Further to the benefits and the impact of the mood diary, eight participants (80%) also discussed  
51 more general impacts of the app that maintained their motivation to engage with it. One  
52 participant mentioned how the app had had a positive impact on them as they were better able to  
53 manage their self-harm:  
54  
55  
56  
57  
58  
59  
60



1  
2  
3 *I've definitely been struggling less... just being able to know that I could, like, track it*  
4 *somewhere, like, almost, like, put it in something, um, I thought was quite helpful. Just being*  
5 *able to almost like, confide in the app you know? It definitely stopped [self-harm] being such a*  
6 *regular occurrence' [012]*  
7

8  
9 Six (60%) specified that they were motivated to engage with the app as they felt that it  
10 encouraged positive action that was beneficial for their wellbeing, *'it encourages me to do things*  
11 *that I know will help me, but I just normally can't be assed to do' [010]*. Further to this,  
12 participants appreciated being made aware of numerous *'stress relieving techniques, and*  
13 *knowing there's like, more options out there, say like, I didn't want to do meditation one day,*  
14 *then I know I could find another one on there to help' [011]*. In this way, the app proved to be a  
15 helpful resource for participants who used it to identify new strategies to help manage their  
16 emotions.  
17

18  
19 One specific way in which the app helped reduce urges to self-harm was in helping participants  
20 to regulate their emotions:  
21

22  
23 *I found it quite helpful...regulating my mood for the rest of the day, 'cause I found that once I*  
24 *acknowledged it on the app and could see that I'd, you know, acknowledged it and was aware of*  
25 *it, I kind of became less likely to, you know, snap at a family member, and stuff like that... Yeah,*  
26 *yeah 'cause like in the past, a lot of like, triggers for self-harm have been frustration related as*  
27 *opposed to kind of like, sadness related....and I imagine that if I hadn't necessarily had that*  
28 *outlet, I would have then become so frustrated I would have been tempted self-harm' [013]*  
29

30  
31 Participants were also motivated to continue using the app as it helped to remind them of  
32 activities that they found joyful, and helped them to realise that these activities could be  
33 beneficial in managing self-harm as well as improving their wellbeing:  
34

35  
36 *I'd look at, like, the activity suggested and stuff like that and kind of... it would remind me that*  
37 *those things were things I wouldn't necessarily think to do, and that they would work. So I think*  
38 *like one of them was talking about, like going for walks and stuff, and it's like, I know I like walks*  
39 *and I know they distract me, but I never put two and two together and thought that maybe it*  
40 *would be good in that kind of scenario...The next day I went for a walk and kind of felt like*  
41 *absolutely amazing... But yeah, like, so I think that was again one of the other key things is that*  
42 *it made me kind of stop and take note of things that actually do help and make me associate them*  
43 *with, like, self-harm prevention rather than just them being like activities that I like to do...since*  
44 *getting it in the last six weeks, I've gone on quite a few walks that I may not have necessarily*  
45 *gone on if I hadn't thought like oh, hang on a minute, that's something that I could do and enjoy*  
46 *and that I could actually, like knew could have a positive effect on my mental health' [013]*  
47  
48

49 Finally, continued use of the app was associated with learning strategies that work without  
50 necessarily having to have their phone on them:  
51

52  
53 *'Even if I don't have my phone with me, I now have some of those ideas in my head 'cause once*  
54 *you use them, you know, once you've used the app for a bit, like, you can get - It it can help you*  
55  
56  
57  
58  
59

1  
2  
3 *just get into a routine of, like, when you start to feel a certain way and know what works, uhm,*  
4 *stuff like the ideas on the app and stuff, what works, what doesn't' [010]*  
5

6  
7 This suggests that the app was beneficial in helping participants to develop and maintain longer  
8 term coping strategies that they could use instead of self-harming.  
9

### 10 **Motivation:** *Barriers*

11 Despite this, four participants (40%) also discussed the difficulties they faced in being motivated  
12 enough to use the app. Reasons for this included forgetting to use it, low mood hindering their  
13 motivation, being stressed, having low energy, and not believing that anything could help..One  
14 participant emphasised that the lack of external encouragement to engage with the app would  
15 make it harder to be motivated, as *'you have to remember, you have to like, very much like do it*  
16 *for yourself'* [017]  
17  
18

19 Further, three participants (30%) felt that they did not need the app as they did not have urges to  
20 self-harm.  
21

### 22 **Capability:** *Facilitators*

23 Participants felt that BlueIce being a smartphone app meant that it was particularly suitable for  
24 university students, who are *'kind of stereotypically always attached to their phone'* [13], so for  
25 whom it would be particularly accessible and convenient. References were also made to BlueIce  
26 being more *'private'* [011] than person-based support, like counseling, for example.  
27  
28

### 29 **Opportunity:** *Facilitators*

30 Nine participants (90%) perceived BlueIce to be subject to fewer barriers of access as other  
31 services or interventions are, allowing more individuals the opportunity to access support.  
32 Barriers to other services discussed include long waiting lists, difficult referral processes, fees,  
33 lack of personalisation, lack of out of hours support' and support being 'scattered' across  
34 resources.  
35  
36

37  
38 *'But obviously compared to things like therapy and stuff, you have it 24/7. So in that way it it's so*  
39 *much better than therapy because, you know therapy, you know I, I get like twice a week for like*  
40 *an hour each time'* [010]  
41

42 Six participants (60%) discussed how BlueIce could also serve as a useful adjunct for people  
43 who are in receipt of professional support, by allowing them a space to track their thoughts and  
44 feelings between sessions:  
45

46  
47 *'This could be my diary for example and I can note it down. And then because we can forget stuff*  
48 *and I could forget something significant, and then when I have to therapy session we can talk*  
49 *about everything and my feelings on that day, and I think it would support the counseling*  
50 *session.'* [016]  
51

52 Finally, one participant praised the opportunity to still be able to receive support without  
53 requiring any interaction:  
54  
55  
56  
57  
58  
59  
60

1  
2  
3 *I think it might be quite helpful because, I know that there are times for me at least where if I'm*  
4 *not feeling great I don't like talking to people, but also, like, I don't exactly want to neglect my*  
5 *health either, so having that option to not have to talk to anyone but still sort of helping yourself*  
6 *in a way is really nice.' [001]*  
7

### 9 **Opportunity: Barrier**

10 Conversely, four participants (40%) also discussed how they do not perceive BlueIce as a  
11 replacement for professional support, as there are further opportunities for support that the app  
12 does not provide. Three participants (30%) noted how the lack of human interaction is a  
13 downside as they valued input from a mental health professional. One participant explained how  
14 this is important to them as they need firm direction in therapy in order to improve their  
15 wellbeing:  
16

17  
18 *'What I have with my counselor now you know, sometimes he would say something and I'll be*  
19 *like... especially with me, with my personality and you know, not being able maybe to take help*  
20 *from other people, or not knowing what's best for myself, and then someone else telling me what*  
21 *to do... I'd already told him as well, 'you need to be a bit harsh with me'. I don't want anyone*  
22 *soft.' [016]*  
23

24  
25 One participant commented on how they perceived the function of BlueIce to be more relative to  
26 in the moment distractions, whereas therapy is important for *'getting to the route of the problem,*  
27 *and I think that to get to the route of a problem it needs to be face to face, it needs to be*  
28 *individualised, and you wouldn't want a computer or something to go through that with you cos*  
29 *then it can get it wrong and that can have consequences and things' [003]*  
30

## 31 **Discussion**

32  
33 This exploratory study is the first to evaluate the acceptability and safety of a smartphone app  
34 (BlueIce) for university students who self-harm. Overall, the app was found to be acceptable and  
35 safe, as well helpful for participants to manage their self-harm and promote behaviour beneficial  
36 to wellbeing. Safety was determined quantitatively, with no scores on wellbeing measures  
37 deteriorating over the period, and qualitatively, with participants reporting that BlueIce was safe  
38 to use and presented no risks to students. Similarly, no adverse events were reported by  
39 participants or wellbeing staff. However, some limitations of the app were also noted, such as the  
40 motivation required to engage with it.  
41  
42  
43

### 44 **Comparison with prior work**

45  
46 Levels of anxiety and depression symptomatology within the sample were higher than have been  
47 found in clinical samples with similar age groups. For example, Bentley et al [39] found mean  
48 GAD-7 and PHQ-9 scores of 8.5 and 10.6 respectively, compared to 12.5 and 16.5 in the current  
49 sample. Interestingly, surveys of university students have found scores that are comparable to  
50 those found in non-student clinical populations; Akram et al [40] reported a mean GAD-7 score  
51 of 9.3 and a PHQ-9 score of 10.1 based on a sample of 1,273 students. This endorses findings  
52 that university students are at a significantly heightened risk of struggling with mental health  
53 difficulties [2, 41]. In the baseline measures all participants classed themselves as either having  
54 self-harmed within the past 2 months or as currently having thoughts of self-harm. Despite this,  
55  
56  
57  
58  
59

1  
2  
3 in the two weeks prior, very few had self-harmed or had thoughts of self-harming. This raises  
4 interesting questions regarding how individuals who self-harm perceive their self-harm status.  
5 Claréus et al [42] investigated this and identified that individuals typically perceive themselves  
6 as having stopped self-harming if they had done so few times within the past month or year.  
7 However, some participants still did identify as someone who self-harms despite not having self-  
8 harmed within the past year. Importantly, it was found that how individuals perceive their  
9 recovery is more important than the time that has elapsed since the last act of self-harm. This  
10 corroborates the importance of asking participants to self-identify their self-harm status, rather  
11 than presuming they no longer self-harm in accordance with a certain time frame.  
12  
13

14  
15 The current sample scored lower on measures of coping self-efficacy at baseline than in other  
16 studies of university students who self-harm [34]. It is important to acknowledge the context in  
17 which this research occurred, as the trial period was within a national lockdown due to the  
18 COVID-19 pandemic, in which everyone was encouraged to stay at home to stop the spread of  
19 the virus. Contact with anyone outside of the household was restricted. Consequently, many  
20 institutions closed, including universities, and most interaction had to occur in online spaces  
21 instead. This meant that university students were no longer attending in-person lectures, and the  
22 participants in this study were no longer attending in-person counseling sessions. This context  
23 may explain participants' lower coping self-efficacy, as students may have had less access to  
24 resources that positively impacted their abilities to cope, such as social networks [43]. A survey  
25 of 576 students did indeed find that the pandemic negatively impacted students' mood and  
26 wellness [44], suggesting they may have been particularly vulnerable during this time.  
27  
28

29  
30 Despite this sample comprising students who had all disclosed self-harm to a mental health  
31 professional, a quarter of participants in this study indicated that they usually do not tell anybody  
32 when they self-harm. This suggests that, even for this group who have disclosed self-harm to a  
33 mental health professional and volunteered for a research study regarding a self-harm  
34 intervention, discussing self-harm can still be challenging. Importantly, this sample seemed to  
35 struggle more with self-harm urges than self-harm behaviours, with 12 participants indicating  
36 that they had self-harmed either rarely or never within the past two weeks, but with two thirds  
37 indicating that their urges to self-harm were strong. This reinforces the importance of measuring  
38 self-harm urges as well as behaviours, as they can be predictive of future self-harm and can still  
39 be very distressing for the individual [45, 46]. Moreover, a questionnaire completed by 1,296  
40 students found that self-harm thoughts alone are still able to allow the individual relief from  
41 difficult emotions [47].  
42  
43

44  
45 Generally, there was a high level of engagement with the app with several participants using it  
46 frequently, adding personalised content to the app, tracking their mood, and using BlueIce in  
47 moments of distress. High levels of engagement with BlueIce have also been found in previous  
48 studies with adolescents [48]. Despite the app originally being designed with and for adolescents,  
49 this did not seem to deter university students from engaging with it and finding it beneficial.  
50 Participants in this study typically praised the simplicity of the app and enjoyed the design,  
51 although some found the mood diary too simple to capture their experiences; this split in opinion  
52 replicates findings from the previous evaluation of the acceptability of BlueIce with university  
53 students [20]. Nonetheless, those who did benefit from the mood diary discussed how it helped  
54 them to manage their emotions by providing an outlet for them through which they could get  
55  
56  
57  
58  
59

1  
2  
3 some relief from their difficult feelings, as well as being able to identify triggers for different  
4 moods. This mirrors findings from another study with young adults who self-harm, who found  
5 mood tracking via a smartphone app beneficial in managing emotions and identifying triggers  
6 [49]. Participants in the current study also found it helpful being able to reflect on their mood in  
7 difficult moments, as well as more broadly in order to gain perspective and feel more optimistic  
8 by realising that they do have good days as well as bad. These qualitative findings resonate with  
9 the quantitative findings showing an increase in participants perceived self-efficacy in being able  
10 to stop unpleasant thoughts or emotions following the trial period, rated using the coping self-  
11 efficacy scale [33]. It may be that the techniques participants learnt to manage their emotions,  
12 promote positive wellbeing and to cope in alternative ways as opposed to self-harm, as discussed  
13 above, may have contributed to their heightened beliefs in their abilities to stop difficult thoughts  
14 and emotions.  
15  
16  
17

18 Around half of the participants indicated that BlueIce had stopped them from harming  
19 themselves at certain points. While this is important, previous research with university students  
20 with lived experience of self-harm highlighted that relying on a reduction in self-harm  
21 behaviours is not necessarily the best way to measure the success of an intervention [50],  
22 preferring a more holistic and wider perspective that also considers their general wellbeing [51].  
23 In particular, university students who self-harm have emphasised wanting self-harm  
24 interventions to help them to learn more adaptive coping strategies and to address their broader  
25 mental health difficulties that are ‘triggers’ for their self-harm [13]. 80% of participants in the  
26 interviews discussed some positive impact of the app, including helping them to develop longer  
27 term, alternative coping strategies, and encouraging action that was beneficial for their  
28 wellbeing. As mentioned, participants’ perceived abilities to stop unpleasant thoughts and  
29 emotions also improved. Further, participants in this study believed that BlueIce could help  
30 students struggling with a range of mental health difficulties, as well as typical university  
31 stressors such as exams. Overall, this would suggest that BlueIce typically aligned with  
32 university students’ favoured outcomes of interventions. However, one participant did specify  
33 that professional support is necessary for getting to the route of the issue behind their self-harm.  
34 This reinforces the heterogeneity surrounding preferences for support that has been found  
35 previously [13, 52, 53], emphasising the need to ensure university students are able to access a  
36 variety of resources and sources of support.  
37  
38  
39  
40

41 The function that BlueIce could provide was explored, with participants suggesting it could be a  
42 helpful adjunct to counseling that allowed users to log how they had been feeling in between  
43 sessions to relay back to their counselor. Participants also discussed finding it helpful in  
44 moments of distress by reminding them of techniques to manage their emotions or distract  
45 themselves, without the user having to search for techniques themselves. The longer-term impact  
46 was also discussed, with participants commenting on having a better understanding of their  
47 triggers and how to manage their emotions, without even having the app in front of them. This  
48 confirms the perception identified in a previous study investigating the acceptability of BlueIce  
49 with university students, where it was identified as a useful reminder of adaptive coping  
50 strategies in difficult moments, as well as a means of learning ways of processing emotions [20].  
51 This also reflects findings with adolescents, who reported that BlueIce helped them to reframe  
52 difficult thoughts and provided a helpful distraction [19]. This suggests that BlueIce could be a  
53 useful tool that is scalable, able to offer ‘out of hours’ support, can help students cope in difficult  
54  
55  
56  
57  
58  
59  
60

1  
2  
3 moments, and reach more students who may be struggling with self-harm and feel unable to  
4 directly ask for help. Research into self-harm interventions in university settings is very limited,  
5 for example Nawaz et al [54] found only two studies meeting this criteria, neither of which were  
6 found to be effective in reducing self-harm. More research is needed to establish the  
7 effectiveness of BlueIce, nevertheless, the current study identifies it as a valuable and acceptable  
8 tool for students.  
9

### 10 11 Limitations

12 Firstly, participants in this study all used the app alongside counseling provided by the university  
13 wellbeing services. As such, it is not possible to directly attribute the improvements in  
14 participants' wellbeing to either the counseling or the app. Similarly, participants were recruited  
15 from one university wellbeing service who had already sought help for their self-harm. These  
16 findings may not be representative of students attending other universities or those who self-  
17 harm but have not sought help. Similarly, the sample were demographically homogenous so  
18 these results may not generalise to students from other genders or ethnicities for example. As  
19 BlueIce was found to be safe to use, future research should seek to assess the impact of  
20 implementing BlueIce more widely with students in the general university population.  
21  
22

23  
24 Secondly, this was an exploratory open study with a small number of participants and as such  
25 data is limited and must be interpreted with caution. Challenges to recruitment were experienced  
26 including problems accessing students during the university summer break and the COVID-19  
27 pandemic when students were not physically present on campus. In addition, to maximise  
28 student safety, we recruited participants through the University wellbeing services but this meant  
29 that we had no direct access to possible participants. Steps were taken to try and mitigate these  
30 challenges, such as drafting email templates and eligibility checklists to reduce staff burden, but  
31 recruitment remained limited. Consequently, future research would benefit from a larger scale  
32 study to determine the effectiveness of BlueIce in this population.  
33  
34

35  
36 Finally, this research occurred during a period of national lockdown due to the COVID-19  
37 pandemic. This could have affected our results which may be lacking temporal validity.  
38

### 39 Conclusion

40  
41 In summary, BlueIce proved to be a safe, acceptable and helpful tool for university students  
42 attending face-to-face mental health services. Following use, participants reported that they had  
43 developed more adaptive coping mechanisms, were better able to identify triggers for self-harm,  
44 and had fewer symptoms of depression and anxiety. This mirrors previous research into the use  
45 of BlueIce among university students, adding further credence to its benefits for this population.  
46

47  
48 Further research is indicated using robust methodologies and appropriately powered cohorts to  
49 investigate these findings further.  
50

### 51 Acknowledgements

52  
53 The authors would like to thank the participants for their contribution to this research.  
54  
55  
56  
57  
58  
59  
60

### Competing interests

Paul Stallard designed the BlueIce app but receives no financial gain from the app or from this research. The other authors declare that they have no conflicts of interest.

### Contributorship statement

All authors contributed to the draft of this manuscript. Bethany Cliffe completed data collection. Bethany Cliffe, Emma Moore and Kathryn Whittle completed qualitative data analysis. Bethany Cliffe completed quantitative data analysis. Paul Stallard provided supervision.

### Funding

This research was funded by the University of Bath.

### Data sharing

Consent was not received from participants to make data publicly available.

### References

1. NICE. Self-Harm [Internet]. 2013 Jun. (Quality Standard). Available from: <https://www.nice.org.uk/guidance/qs34/resources/selfharm-2098606243525>
2. Swannell SV, Martin GE, Page A, et al. Prevalence of Nonsuicidal Self-Injury in Nonclinical Samples: Systematic Review, Meta-Analysis and Meta-Regression. *Suicide Life Threat Behav* 2014;44:273–303. <https://doi.org/10.1111/sltb.12070>
3. Taliaferro LA, Muehlenkamp JJ. Risk Factors Associated With Self-injurious Behavior Among a National Sample of Undergraduate College Students. *J Am Coll Health* 2015;63:40–8. <https://doi.org/10.1080/07448481.2014.953166>
4. Griffin K, Twynstra J, Gilliland JA, et al. Correlates of self-harm in university students: A cross-sectional study. *J Am Coll Health* 2021;0:1–8. <https://doi.org/10.1080/07448481.2021.1909049>
5. Chandler A. Narrating the self-injured body. *Med Humanit* 2014;40:111–6. <https://doi.org/10.1136/medhum-2013-010488>
6. Long M. ‘We’re not monsters ... we’re just really sad sometimes:’ hidden self-injury, stigma and help-seeking. *Health Sociol Rev* 2018;27:89–103.
7. Sheehy K, Noureen A, Khaliq A, et al. An examination of the relationship between shame, guilt and self-harm: A systematic review and meta-analysis. *Clin Psychol Rev* 2019;73(101779). <https://doi.org/10.1016/j.cpr.2019.101779>
8. Simone AC, Hamza CA. Examining the disclosure of nonsuicidal self-injury to informal and formal sources: A review of the literature. *Clin Psychol Rev* 2020;82(101907). <https://doi.org/10.1016/j.cpr.2020.101907>
9. Simone AC, Hamza CA. A longitudinal examination of predictors of nonsuicidal self-injury disclosures among university students. *J Clin Psychol* 2021;1(18). <https://doi.org/10.1002/jclp.23277>
10. Staniland L, Hasking P, Boyes M, et al. Stigma and nonsuicidal self-injury: Application of a conceptual framework. *Stigma Health* 2021;6:312–23. <https://doi.org/10.1037/sah0000257>
11. Fitzgerald J, Curtis C. Non-suicidal self-injury in a New Zealand student population: Demographic and self-harm characteristics. *N Z J Psychol* 2017;46:156–63.

12. Whitlock J, Eckenrode J, Silverman D. Self-injurious Behaviors in a College Population. *Pediatrics* 2006;117:1939–48. <https://doi.org/10.1542/peds.2005-2543> PMID: 16740834
13. Cliffe B, Stallard P. University students' experiences and perceptions of interventions for self-harm. *J Youth Stud* 2022;0:1–15. <https://doi.org/10.1080/13676261.2022.2033187>
14. Topooco N, Fowler LA, Fitzsimmons-Craft EE, et al. Digital interventions to address mental health needs in colleges: Perspectives of student stakeholders. *Internet Interventions*. 2022;28:100528. <https://doi.org/10.1016/j.invent.2022.100528>
15. Lattie EG, Adkins EC, Winkvist N, et al. Digital Mental Health Interventions for Depression, Anxiety, and Enhancement of Psychological Well-Being Among College Students: Systematic Review. *J Med Internet Res* 2019 Jul;21(7). <https://www.jmir.org/2019/7/e12869>  
<https://doi.org/10.2196/12869>
16. Ponzio S, Morelli D, Kawadler JM, et al. Efficacy of the Digital Therapeutic Mobile App BioBase to Reduce Stress and Improve Mental Well-Being Among University Students: Randomized Controlled Trial. *JMIR mHealth and uHealth* 2020 Apr;8:e17767.  
<https://doi.org/10.2196/17767>
17. Barnett P, Arundell LL, Saunders R, et al. The efficacy of psychological interventions for the prevention and treatment of mental health disorders in university students: A systematic review and meta-analysis. *Journal of Affective Disorders*. 2021;280:381–406.  
<https://doi.org/10.1016/j.jad.2020.10.060>
18. Stallard P, Porter J, Grist R. A Smartphone App (BlueIce) for Young People Who Self-Harm: Open Phase 1 Pre-Post Trial. *JMIR MHealth UHealth* 2018;6:e32.  
<https://doi.org/10.2196/mhealth.8917>
19. Grist R, Porter J, Stallard P. Acceptability, Use, and Safety of a Mobile Phone App (BlueIce) for Young People Who Self-Harm: Qualitative Study of Service Users' Experience. *JMIR Ment Health* 2018 Feb;5(1). <https://www.ncbi.nlm.nih.gov/pmc/articles/PMC5845106/>  
<https://doi.org/10.2196/mental.8779>
20. Cliffe B, Stokes Z, Stallard P. The Acceptability of a Smartphone App (BlueIce) for University Students Who Self-harm. *Arch Suicide Res*. 2022;0:1–17.  
<https://doi.org/10.1080/13811118.2021.2022552>
21. Kaufman J, Birmaher B, Brent D, Rao U, Flynn C, Moreci P, et al. Schedule for Affective Disorders and Schizophrenia for School-Age Children-Present and Lifetime Version (K-SADS-PL): Initial Reliability and Validity Data. *Journal of the American Academy of Child & Adolescent Psychiatry*. 1997 Jul 1;36(7):980–8.
22. Malterud K, Siersma VD, Guassora AD. Sample Size in Qualitative Interview Studies: Guided by Information Power. *Qual Health Res*. 2016 Nov 1;26(13):1753–60.
23. Stallard P, Porter J, Grist R. Safety, Acceptability, and Use of a Smartphone App, BlueIce, for Young People Who Self-Harm: Protocol for an Open Phase I Trial. *JMIR Res Protoc* 2016;5:e217. <https://doi.org/10.2196/resprot.6525>
24. Craig P, Dieppe P, Macintyre S, et al. Developing and evaluating complex interventions: the new Medical Research Council guidance. *BMJ* 2008 Sep;337.  
<https://www.bmj.com/content/337/bmj.a1655> <https://doi.org/10.1136/bmj.a1655>
25. Washburn JJ, Juzwin KR, Styer DM, et al. Measuring the urge to self-injure: Preliminary data from a clinical sample. *Psychiatry Res* 2010;178:540–4.  
<https://doi.org/10.1016/j.psychres.2010.05.018>



- 1  
2  
3 26. Cloutier PF, Nixon MK. The Ottawa Self-Injury Inventory: A preliminary evaluation.  
4 Abstracts to the 12th International Congress European Society for Child and Adolescent  
5 Psychiatry. *European Child & Adolescent Psychiatry*. 2003;  
6  
7 27. Martin J, Bureau JF, Cloutier P, Lafontaine MF. A Comparison of Invalidating Family  
8 Environment Characteristics Between University Students Engaging in Self-Injurious Thoughts  
9 & Actions and Non-Self-Injuring University Students. *J Youth Adolescence*. 2011 Nov  
10 1;40(11):1477–88.  
11 28. Spitzer RL, Kroenke K, Williams JBW, et al. A Brief Measure for Assessing Generalized  
12 Anxiety Disorder: The GAD-7. *Arch Intern Med*. 2006;166:1092.  
13 <https://doi.org/10.1001/archinte.166.10.1092>  
14  
15 29. Bártolo A, Monteiro S, Pereira A. Factor structure and construct validity of the  
16 Generalized Anxiety Disorder 7-item (GAD-7) among Portuguese college students. *Cad Saúde*  
17 *Pública* 2017;33:e00212716. <https://doi.org/10.1590/0102-311x00212716>  
18  
19 30. Farrer LM, Gulliver A, Bennett K, et al. Demographic and psychosocial predictors of  
20 major depression and generalised anxiety disorder in Australian university students. *BMC*  
21 *Psychiatry* 2016;16:241. <https://doi.org/10.1186/s12888-016-0961-z>  
22  
23 31. Musiat P, Goldstone P, Tarrrier N. Understanding the acceptability of e-mental health -  
24 attitudes and expectations towards computerised self-help treatments for mental health problems.  
25 *BMC Psychiatry* 2014;14:109. <https://doi.org/10.1186/1471-244X-14-109>  
26  
27 32. Kroenke K, Spitzer RL, Williams JBW. The PHQ-9. *J Gen Intern Med*. 2001;16:606–13.  
28 <https://doi.org/10.1046/j.1525-1497.2001.016009606.x>  
29  
30 33. Chesney MA, Neilands TB, Chambers DB, et al. A validity and reliability study of the  
31 coping self-efficacy scale. *Br J Health Psychol* 2006;11:421–37.  
32 <https://doi.org/10.1348/135910705X53155>  
33  
34 34. Midkiff MF, Lindsey CR, Meadows EA, et al. The role of coping self-efficacy in emotion  
35 regulation and frequency of NSSI in young adult college students. *Cogent Psychol*.  
36 2018;5:1520437. <https://doi.org/10.1080/23311908.2018.1520437>  
37  
38 35. Elo S, Kyngäs H. The qualitative content analysis process. *Journal of Advanced Nursing*.  
39 2008;62(1):107–15.  
40  
41 36. O'Connor C, Joffe H. Intercoder Reliability in Qualitative Research: Debates and  
42 Practical Guidelines. *Int J Qual Methods* 2020;19:1609406919899220.  
43 <https://doi.org/10.1177/1609406919899220>  
44  
45 37. Gliem JA, Gliem RR. Calculating, Interpreting, And Reporting Cronbach's Alpha Reliability  
46 Coefficient For Likert-Type Scales. 2003 [cited 2023 Jul 7]; Available from:  
47 <https://scholarworks.iupui.edu/handle/1805/344>  
48  
49 38. Liverpool S, Mota CP, Sales CMD, et al. Engaging Children and Young People in Digital  
50 Mental Health Interventions: Systematic Review of Modes of Delivery, Facilitators, and  
51 Barriers. *J Med Internet Res* 2020;22:e16317. <https://doi.org/10.2196/16317>  
52  
53 39. Bentley KH, Sakurai H, Lowman KL, Rines-Toth L, McKowen J, Pedrelli P, et al.  
54 Validation of brief screening measures for depression and anxiety in young people with  
55 substance use disorders. *Journal of Affective Disorders*. 2021 Mar 1;282:1021–9.  
56  
57 40. Akram U, Ypsilanti A, Gardani M, Irvine K, Allen S, Akram A, et al. Prevalence and  
58 psychiatric correlates of suicidal ideation in UK university students. *Journal of Affective*  
59 *Disorders*. 2020 Jul 1;272:191–7.  
60

- 1  
2  
3  
4  
5  
6  
7  
8  
9  
10  
11  
12  
13  
14  
15  
16  
17  
18  
19  
20  
21  
22  
23  
24  
25  
26  
27  
28  
29  
30  
31  
32  
33  
34  
35  
36  
37  
38  
39  
40  
41  
42  
43  
44  
45  
46  
47  
48  
49  
50  
51  
52  
53  
54  
55  
56  
57  
58  
59  
60
41. Stallman HM. Psychological distress in university students: A comparison with general population data. *Australian Psychologist* 2010;45:249–57. <https://doi.org/10.1080/00050067.2010.482109>
42. Claréus B, Hasking PA, Gray N, et al. Is ceasing self-injury enough? Differences in psychological health between people reporting behavioral cessation of non-suicidal self-injury and those who consider themselves to have stopped self-injuring. *J Clin Psychol* 2022;jclp.23409. <https://doi.org/10.1002/jclp.23409>
43. Sahu P. Closure of Universities Due to Coronavirus Disease 2019 (COVID-19): Impact on Education and Mental Health of Students and Academic Staff. *Cureus* 2020 Apr;12(4). <https://www.cureus.com/articles/30110-closure-of-universities-due-to-coronavirus-disease-2019-covid-19-impact-on-education-and-mental-health-of-students-and-academic-staff> <https://doi.org/10.7759/cureus.7541>
44. Copeland WE, McGinnis E, Bai Y, et al. Impact of COVID-19 Pandemic on College Student Mental Health and Wellness. *Journal of the American Academy of Child & Adolescent Psychiatry*. 2021;60:134-141.e2. <https://doi.org/10.1016/j.jaac.2020.08.466>
45. Burke TA, Ammerman BA, Hamilton JL, et al. Nonsuicidal self-injury scar concealment from the self and others. *Journal of Psychiatric Research*. 2020;130:313–20. <https://doi.org/10.1016/j.jpsychires.2020.07.040>
46. Miller M, Redley M, Wilkinson PO. A Qualitative Study of Understanding Reasons for Self-Harm in Adolescent Girls. *International Journal of Environmental Research and Public Health* 2021;18:3361. <https://doi.org/10.3390/ijerph18073361>
47. Martin J, Bureau JF, Cloutier P, et al. A Comparison of Invalidating Family Environment Characteristics Between University Students Engaging in Self-Injurious Thoughts & Actions and Non-Self-Injuring University Students. *J Youth Adolescence* 2011;40:1477–88. <https://doi.org/10.1007/s10964-011-9643-9>
48. Muscara F, Ng O, Crossley L, Lu S, et al. The feasibility of using smartphone apps to manage self-harm and suicidal acts in adolescents admitted to an inpatient mental health ward. *Digit Health* 2020 Nov;6. <https://www.ncbi.nlm.nih.gov/pmc/articles/PMC7705813/> <https://doi.org/10.1177/2055207620975315>
49. Honary M, Bell B, Clinch S, et al. Shaping the Design of Smartphone-Based Interventions for Self-Harm. *Proceedings of the 2020 CHI Conference on Human Factors in Computing Systems* Honolulu HI USA: ACM; 2020:1–14. <https://dl.acm.org/doi/10.1145/3313831.3376370>
50. Owens C, Fox F, Redwood S, et al. Measuring outcomes in trials of interventions for people who self-harm: qualitative study of service users' views. *BJPsych Open* 2020 Mar;6(2). <https://www.cambridge.org/core/journals/bjpsych-open/article/measuring-outcomes-in-trials-of-interventions-for-people-who-selfharm-qualitative-study-of-service-users-views/00B4C4A51CB7627AEBE960FAB87DCB04> <https://doi.org/10.1192/bjo.2019.93>
51. Knowles S, Sharma V, Fortune S, et al. Adapting a codesign process with young people to prioritize outcomes for a systematic review of interventions to prevent self-harm and suicide. *Health Expectations* 2022. <https://onlinelibrary.wiley.com/doi/abs/10.1111/hex.13479> <https://doi.org/10.1111/hex.13479>
52. Carroll R, Metcalfe C, Gunnell D. Hospital Presenting Self-Harm and Risk of Fatal and Non-Fatal Repetition: Systematic Review and Meta-Analysis. *PLoS One* 2014 Feb;9(2). <https://www.ncbi.nlm.nih.gov/pmc/articles/PMC3938547/> <https://doi.org/10.1371/journal.pone.0089944>

1  
2  
3 53. Hume M, Platt S. Appropriate interventions for the prevention and management of self-harm:  
4 a qualitative exploration of service-users' views. *BMC Public Health* 2007;7:9.

5 <https://doi.org/10.1186/1471-2458-7-9>

6  
7 54. Nawaz RF, Anderson JK, Colville L, Fraser-Andrews C, Ford TJ. Review: Interventions to  
8 prevent or manage self-harm among students in educational settings – a systematic review. *Child*  
9 *and Adolescent Mental Health* [Internet]. [cited 2023 Mar 3];n/a(n/a). Available from:

10 <https://onlinelibrary.wiley.com/doi/abs/10.1111/camh.12634>  
11  
12  
13  
14  
15  
16  
17  
18  
19  
20  
21  
22  
23  
24  
25  
26  
27  
28  
29  
30  
31  
32  
33  
34  
35  
36  
37  
38  
39  
40  
41  
42  
43  
44  
45  
46  
47  
48  
49  
50  
51  
52  
53  
54  
55  
56  
57  
58  
59  
60

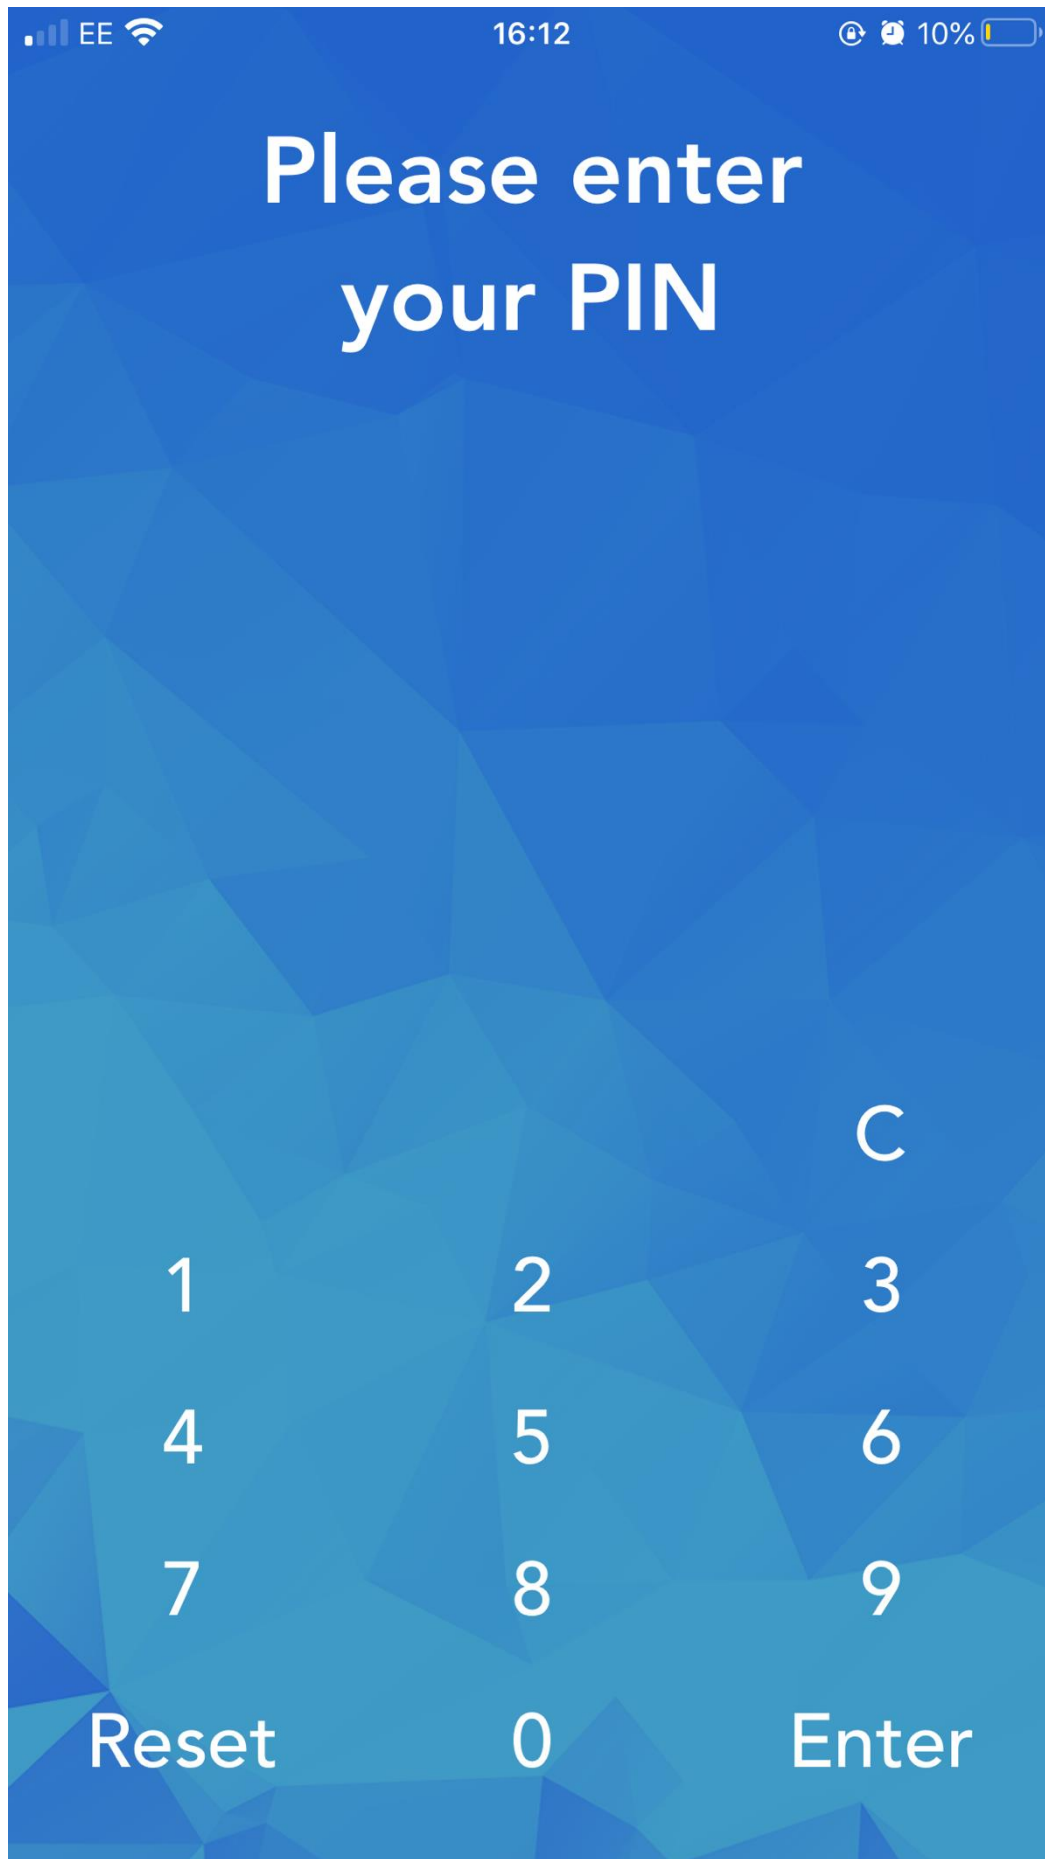

1  
2  
3  
4  
5  
6  
7  
8  
9  
10  
11  
12  
13  
14  
15  
16  
17  
18  
19  
20  
21  
22  
23  
24  
25  
26  
27  
28  
29  
30  
31  
32  
33  
34  
35  
36  
37  
38  
39  
40  
41  
42  
43  
44  
45  
46  
47  
48  
49  
50  
51  
52  
53  
54  
55  
56  
57  
58  
59  
60

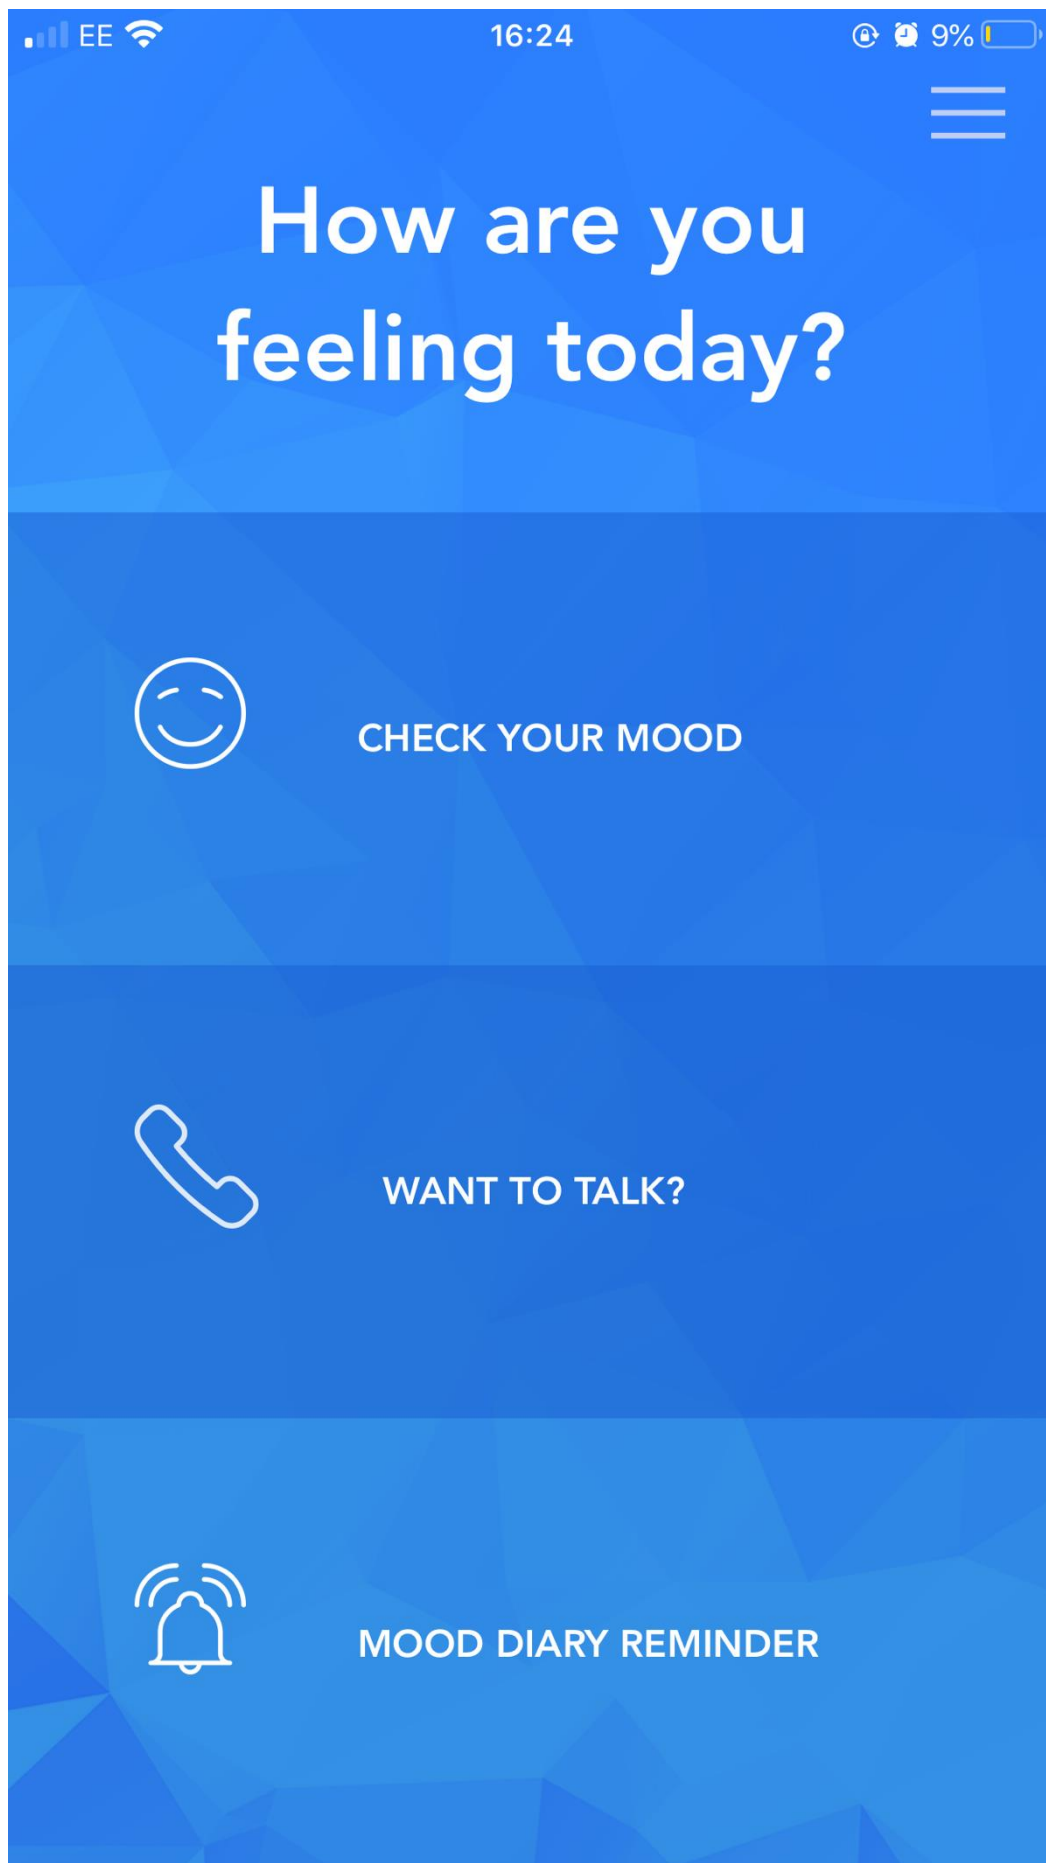

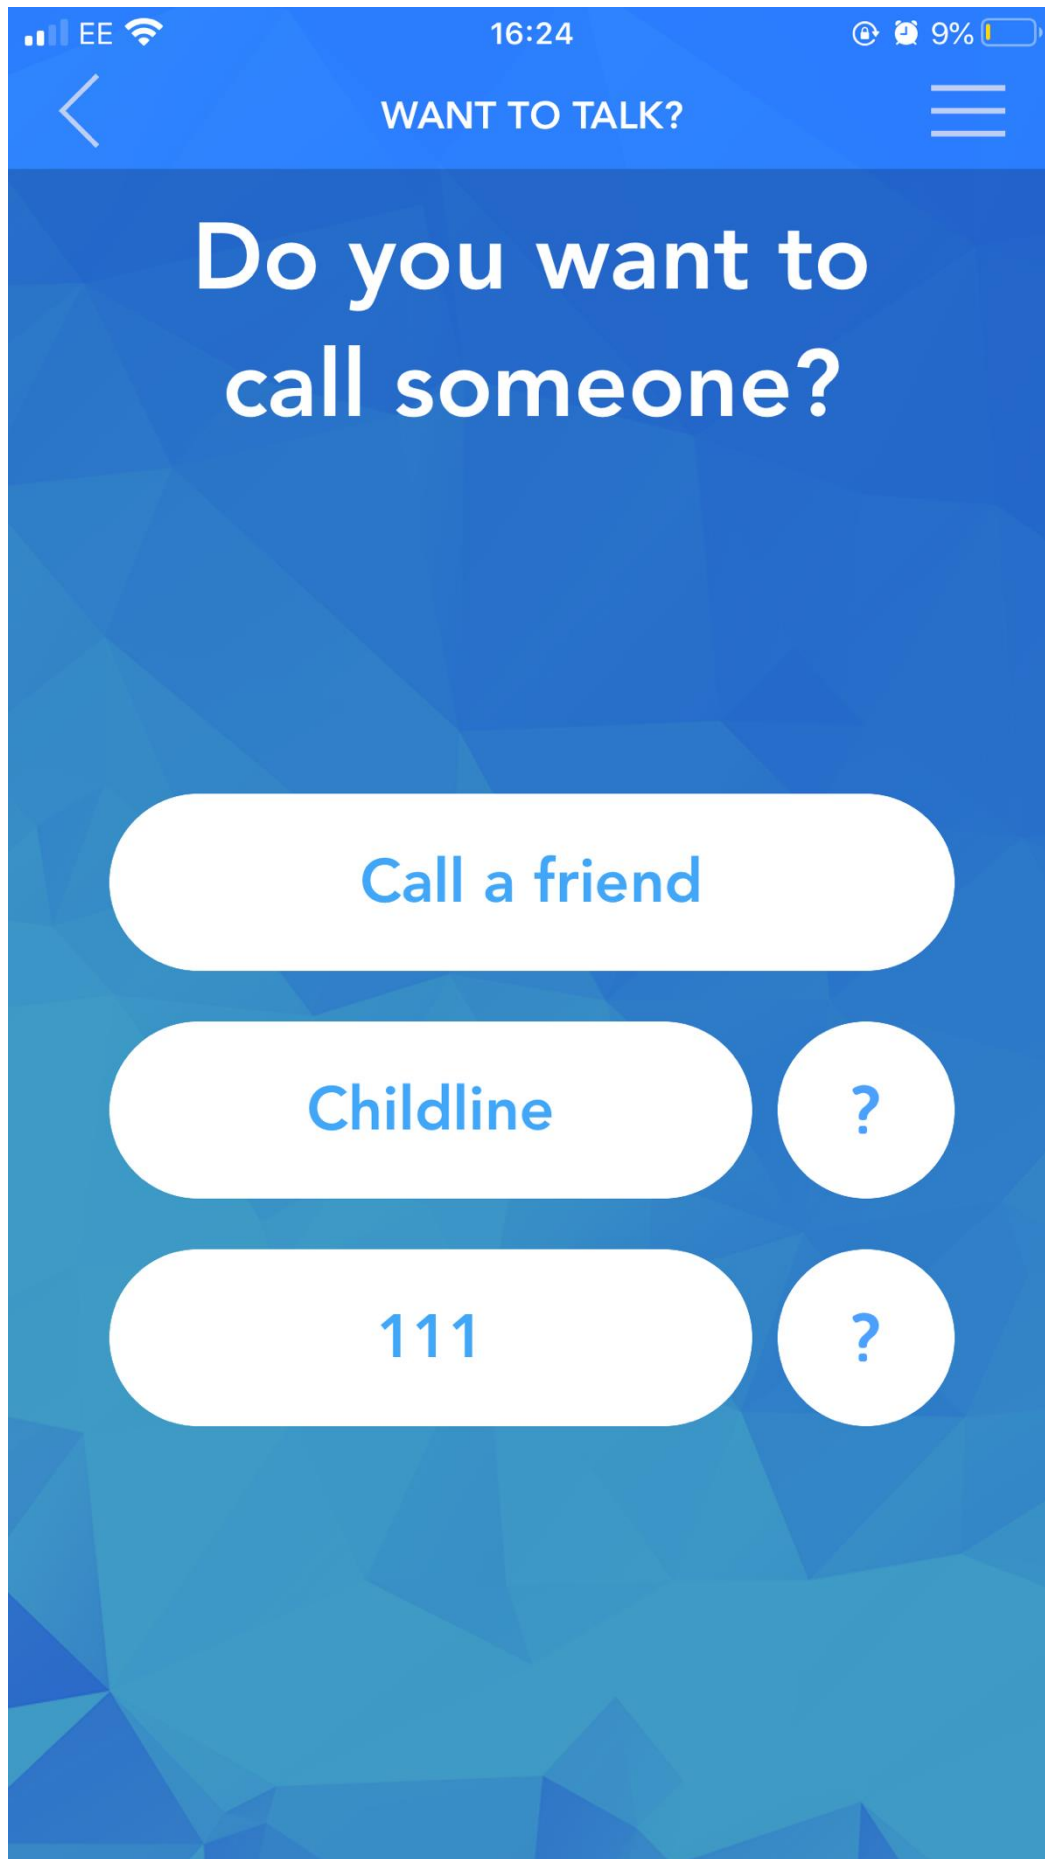

1  
2  
3  
4  
5  
6  
7  
8  
9  
10  
11  
12  
13  
14  
15  
16  
17  
18  
19  
20  
21  
22  
23  
24  
25  
26  
27  
28  
29  
30  
31  
32  
33  
34  
35  
36  
37  
38  
39  
40  
41  
42  
43  
44  
45  
46  
47  
48  
49  
50  
51  
52  
53  
54  
55  
56  
57  
58  
59  
60

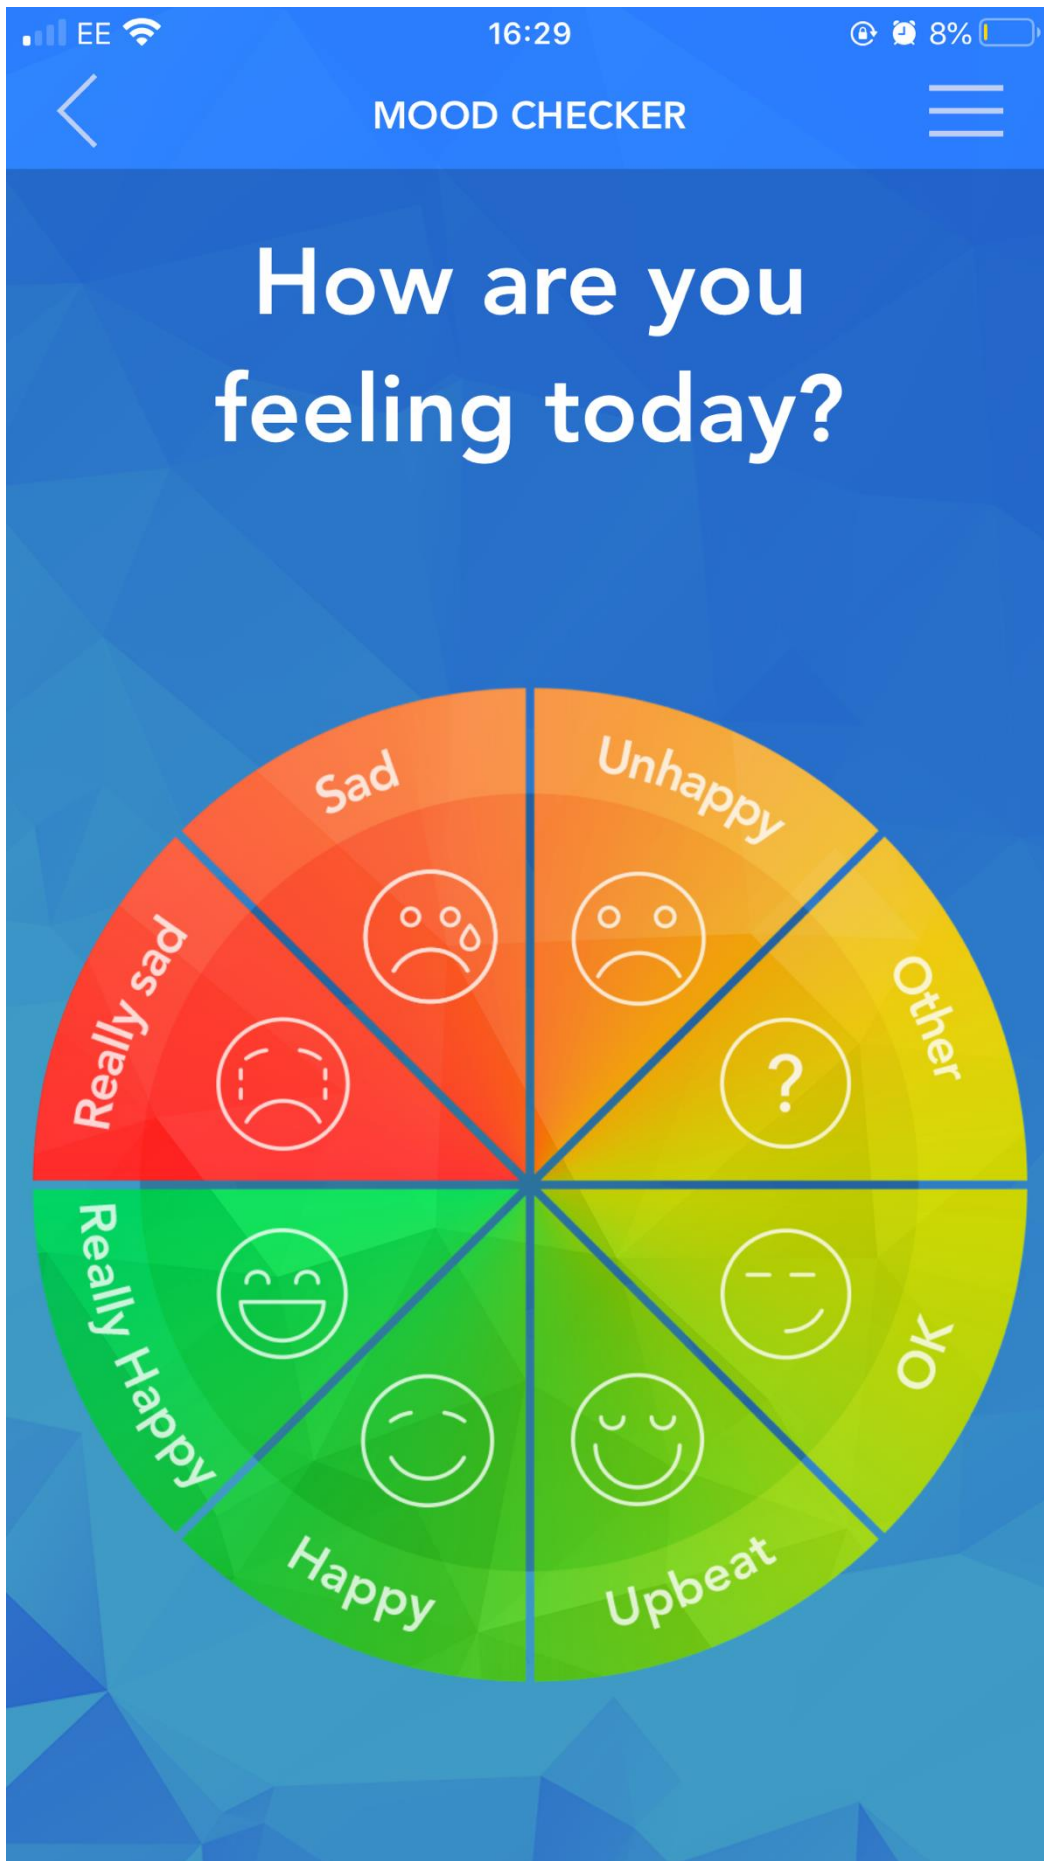

1  
2  
3  
4  
5  
6  
7  
8  
9  
10  
11  
12  
13  
14  
15  
16  
17  
18  
19  
20  
21  
22  
23  
24  
25  
26  
27  
28  
29  
30  
31  
32  
33  
34  
35  
36  
37  
38  
39  
40  
41  
42  
43  
44  
45  
46  
47  
48  
49  
50  
51  
52  
53  
54  
55  
56  
57  
58  
59  
60

MOOD DIARY

September 2020

| S  | M  | T  | W  | T  | F  | S  |
|----|----|----|----|----|----|----|
|    |    | 1  | 2  | 3  | 4  | 5  |
| 6  | 7  | 8  | 9  | 10 | 11 | 12 |
| 13 | 14 | 15 | 16 | 17 | 18 | 19 |
| 20 | 21 | 22 | 23 | 24 | 25 | 26 |
| 27 | 28 | 29 | 30 |    |    |    |

Really Sad

15:48 1 note

Had an argument with my partner



1  
2  
3  
4  
5  
6  
7  
8  
9  
10  
11  
12  
13  
14  
15  
16  
17  
18  
19  
20  
21  
22  
23  
24  
25  
26  
27  
28  
29  
30  
31  
32  
33  
34  
35  
36  
37  
38  
39  
40  
41  
42  
43  
44  
45  
46  
47  
48  
49  
50  
51  
52  
53  
54  
55  
56  
57  
58  
59  
60

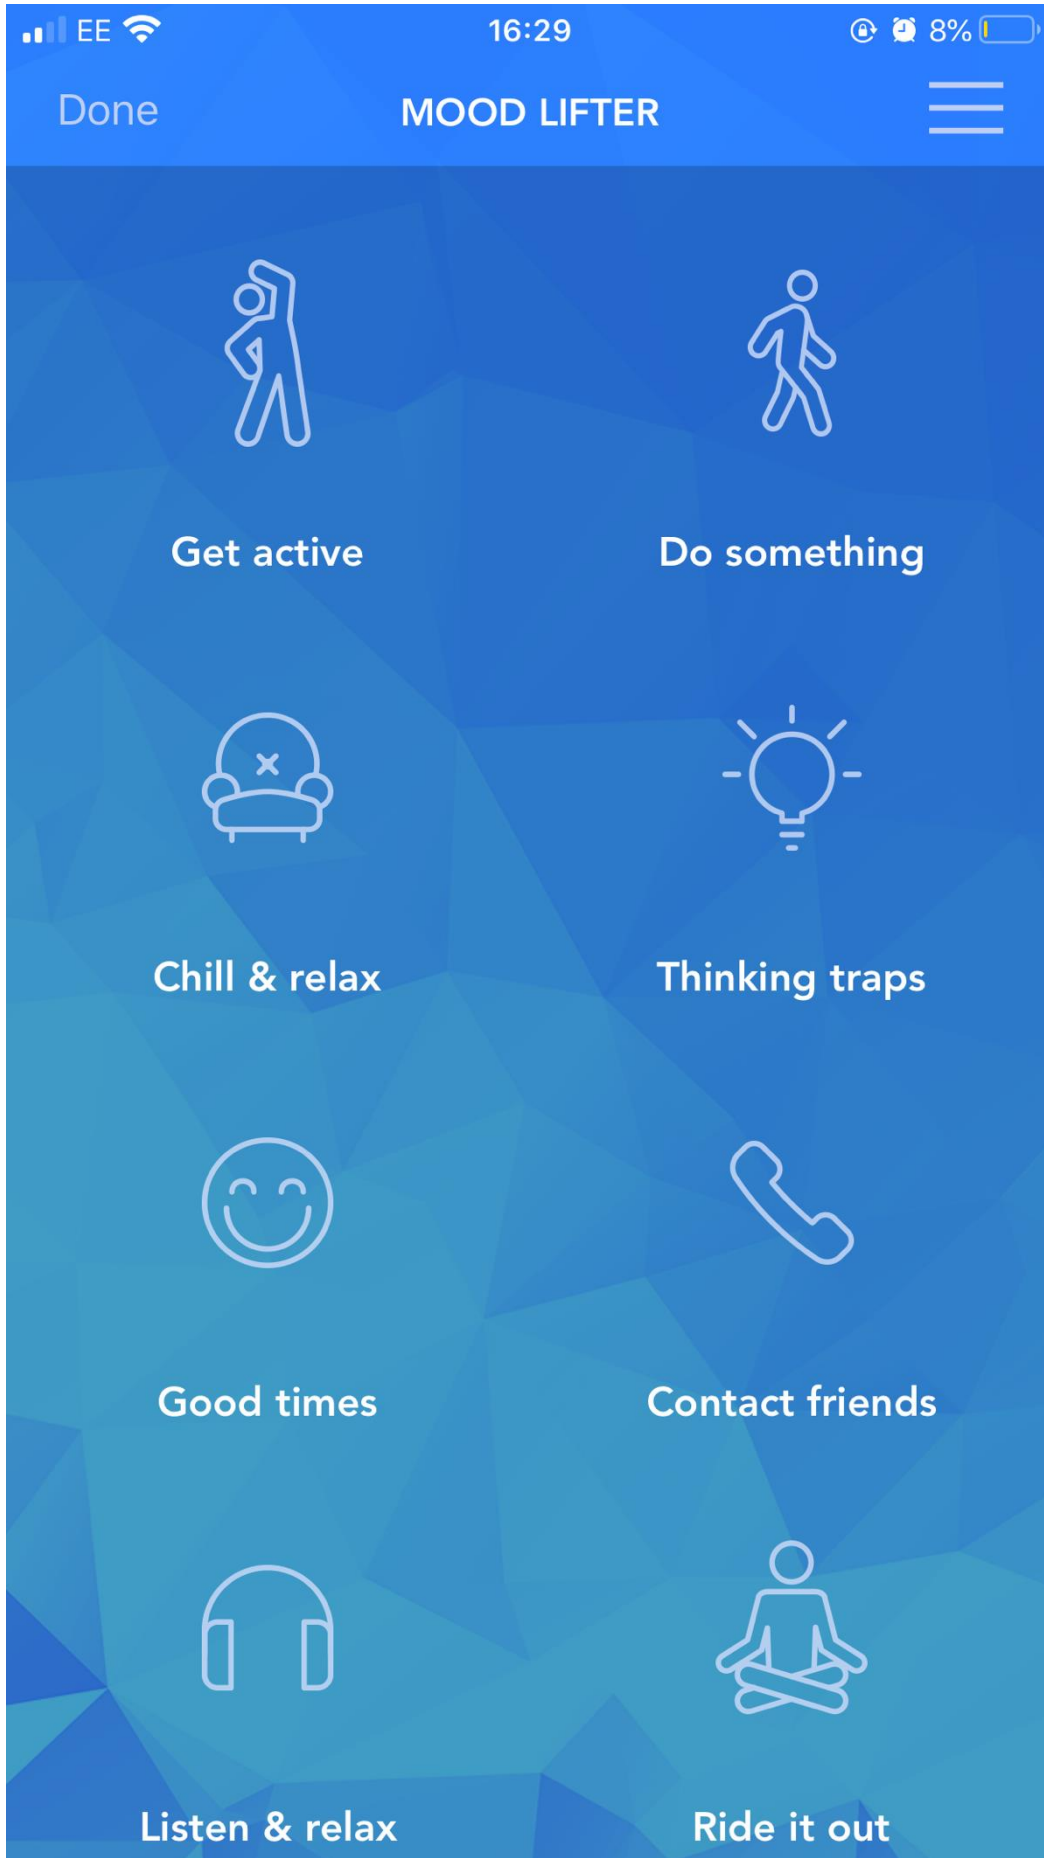

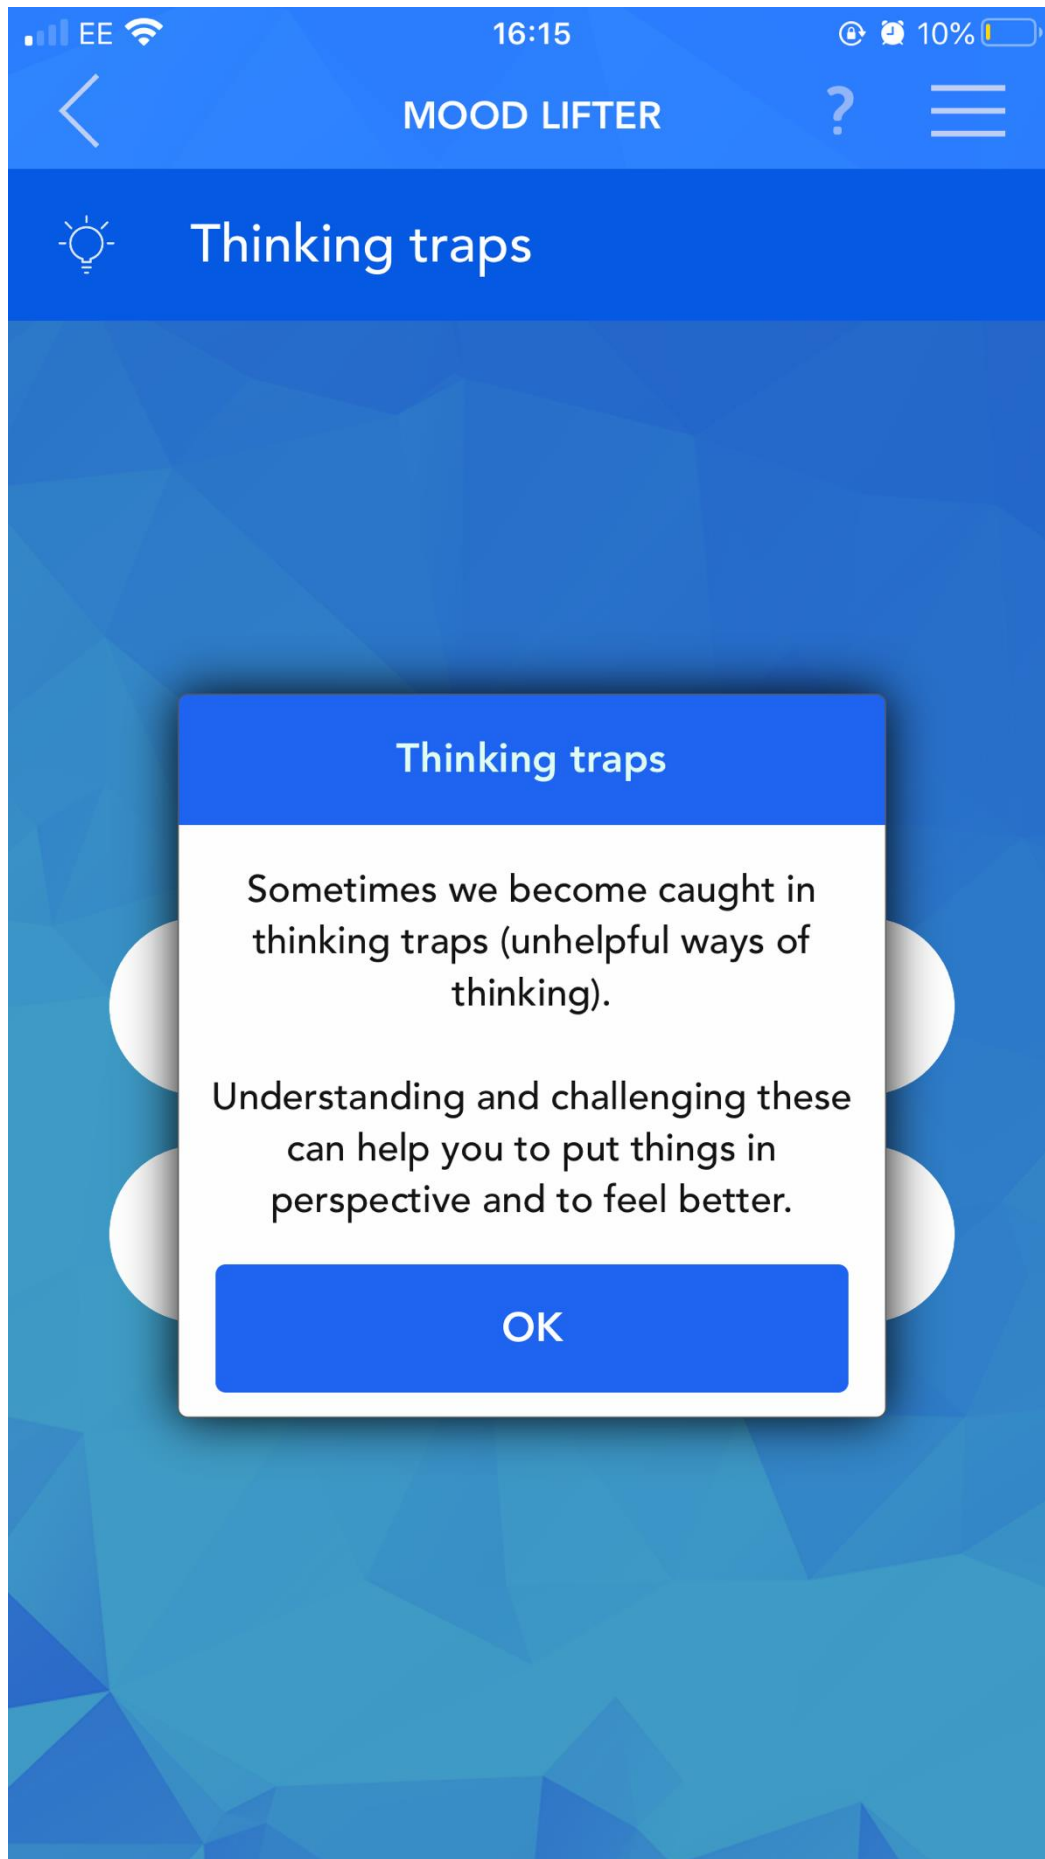

1  
2  
3  
4  
5  
6  
7  
8  
9  
10  
11  
12  
13  
14  
15  
16  
17  
18  
19  
20  
21  
22  
23  
24  
25  
26  
27  
28  
29  
30  
31  
32  
33  
34  
35  
36  
37  
38  
39  
40  
41  
42  
43  
44  
45  
46  
47  
48  
49  
50  
51  
52  
53  
54  
55  
56  
57  
58  
59  
60

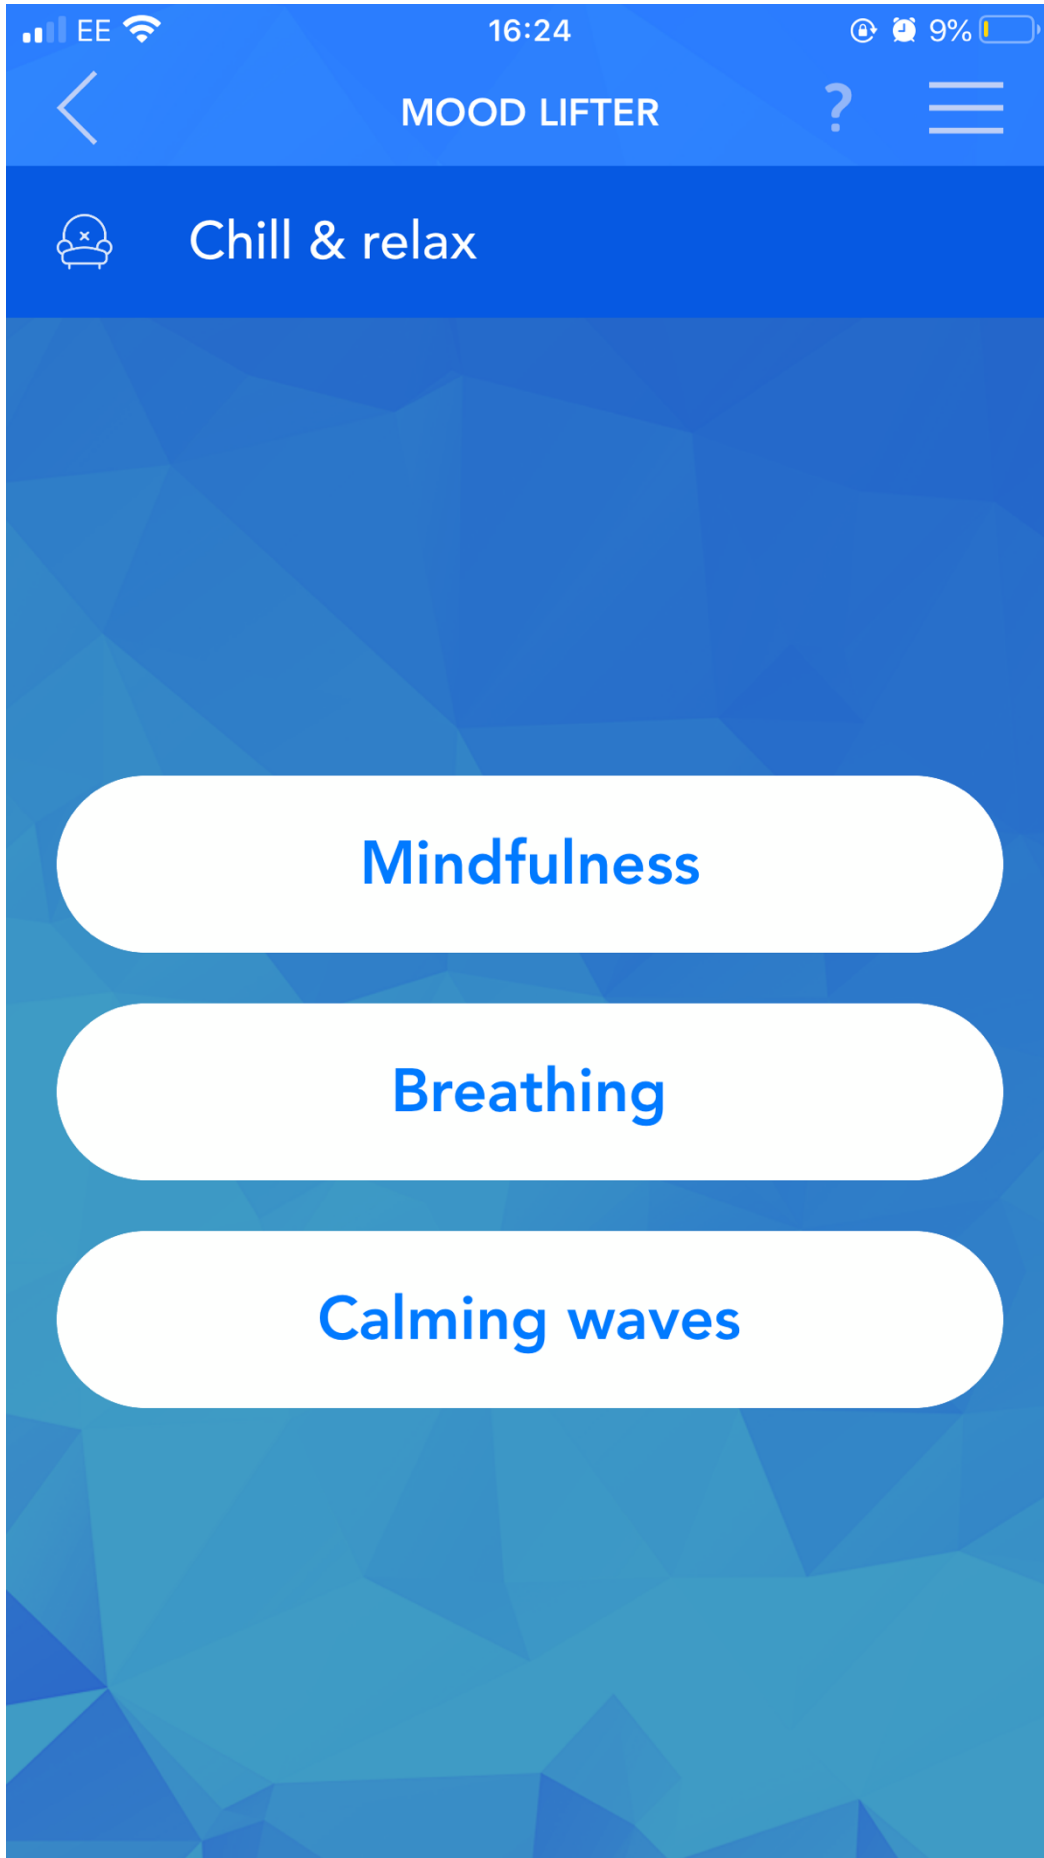

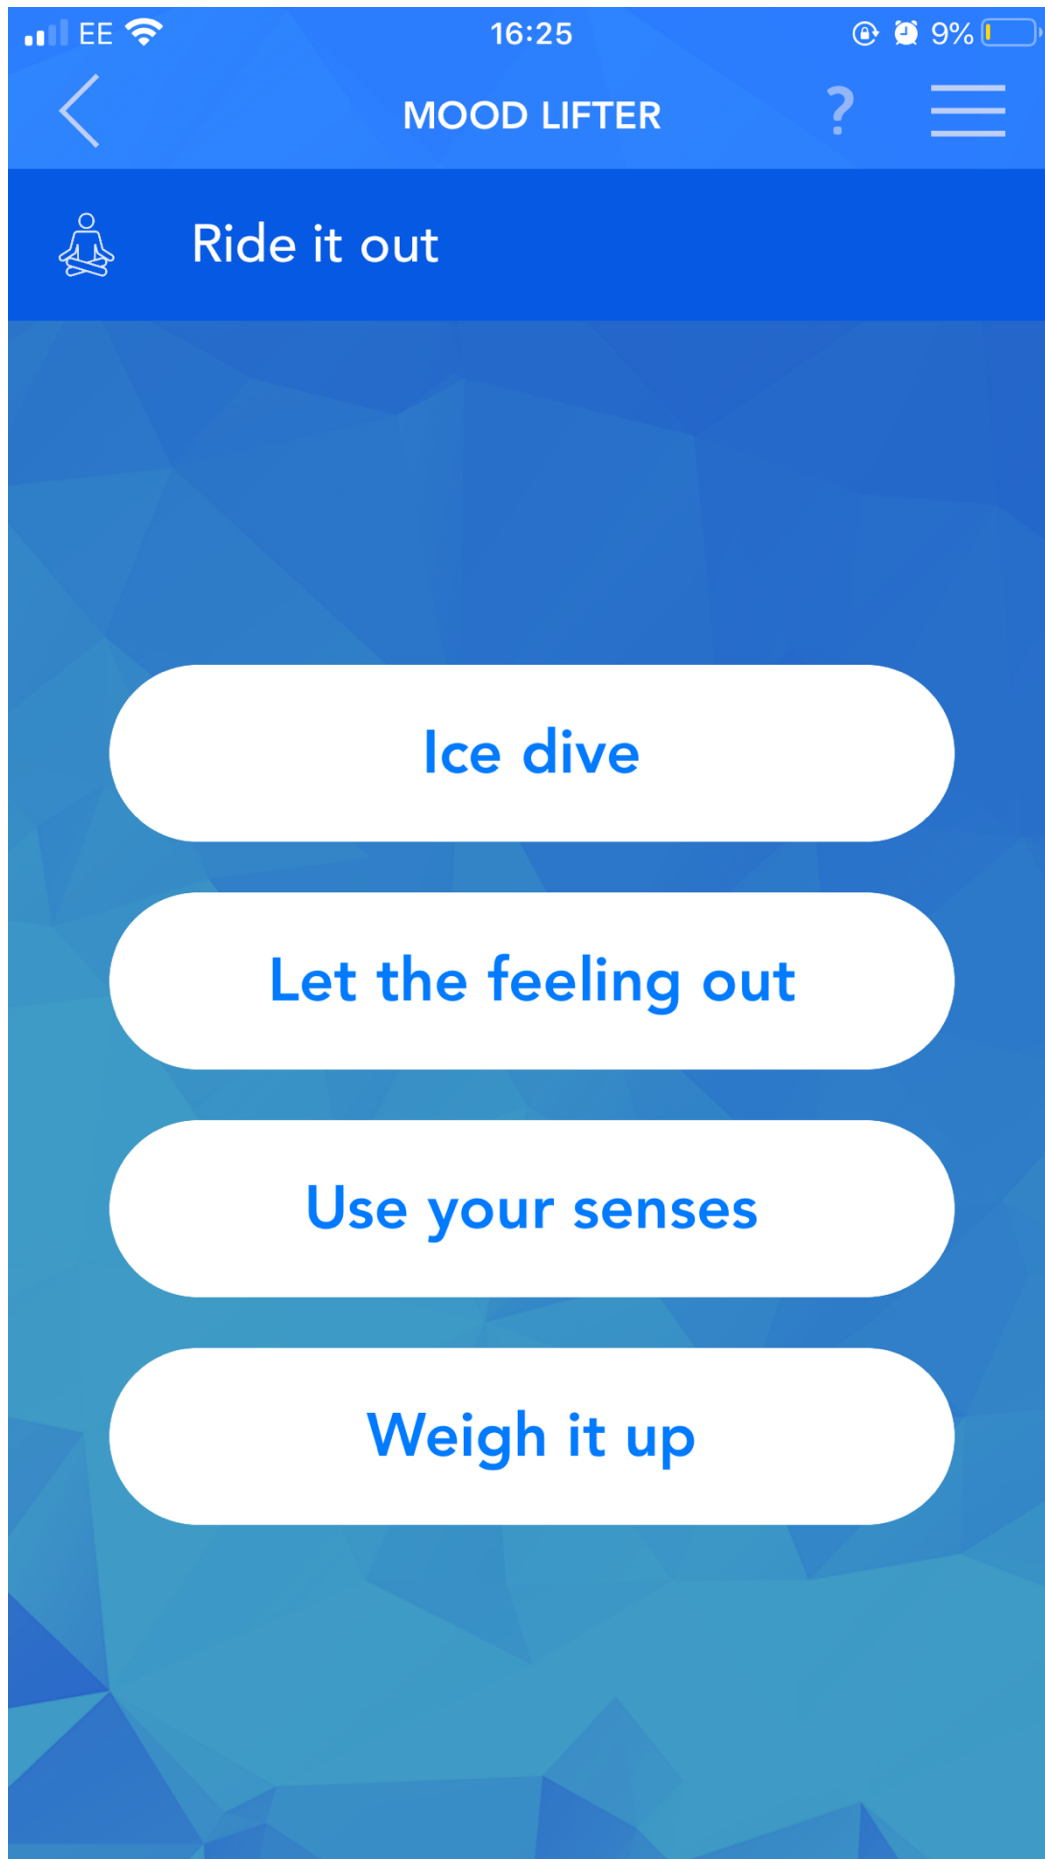

1  
2  
3  
4  
5  
6  
7  
8  
9  
10  
11  
12  
13  
14  
15  
16  
17  
18  
19  
20  
21  
22  
23  
24  
25  
26  
27  
28  
29  
30  
31  
32  
33  
34  
35  
36  
37  
38  
39  
40  
41  
42  
43  
44  
45  
46  
47  
48  
49  
50  
51  
52  
53  
54  
55  
56  
57  
58  
59  
60

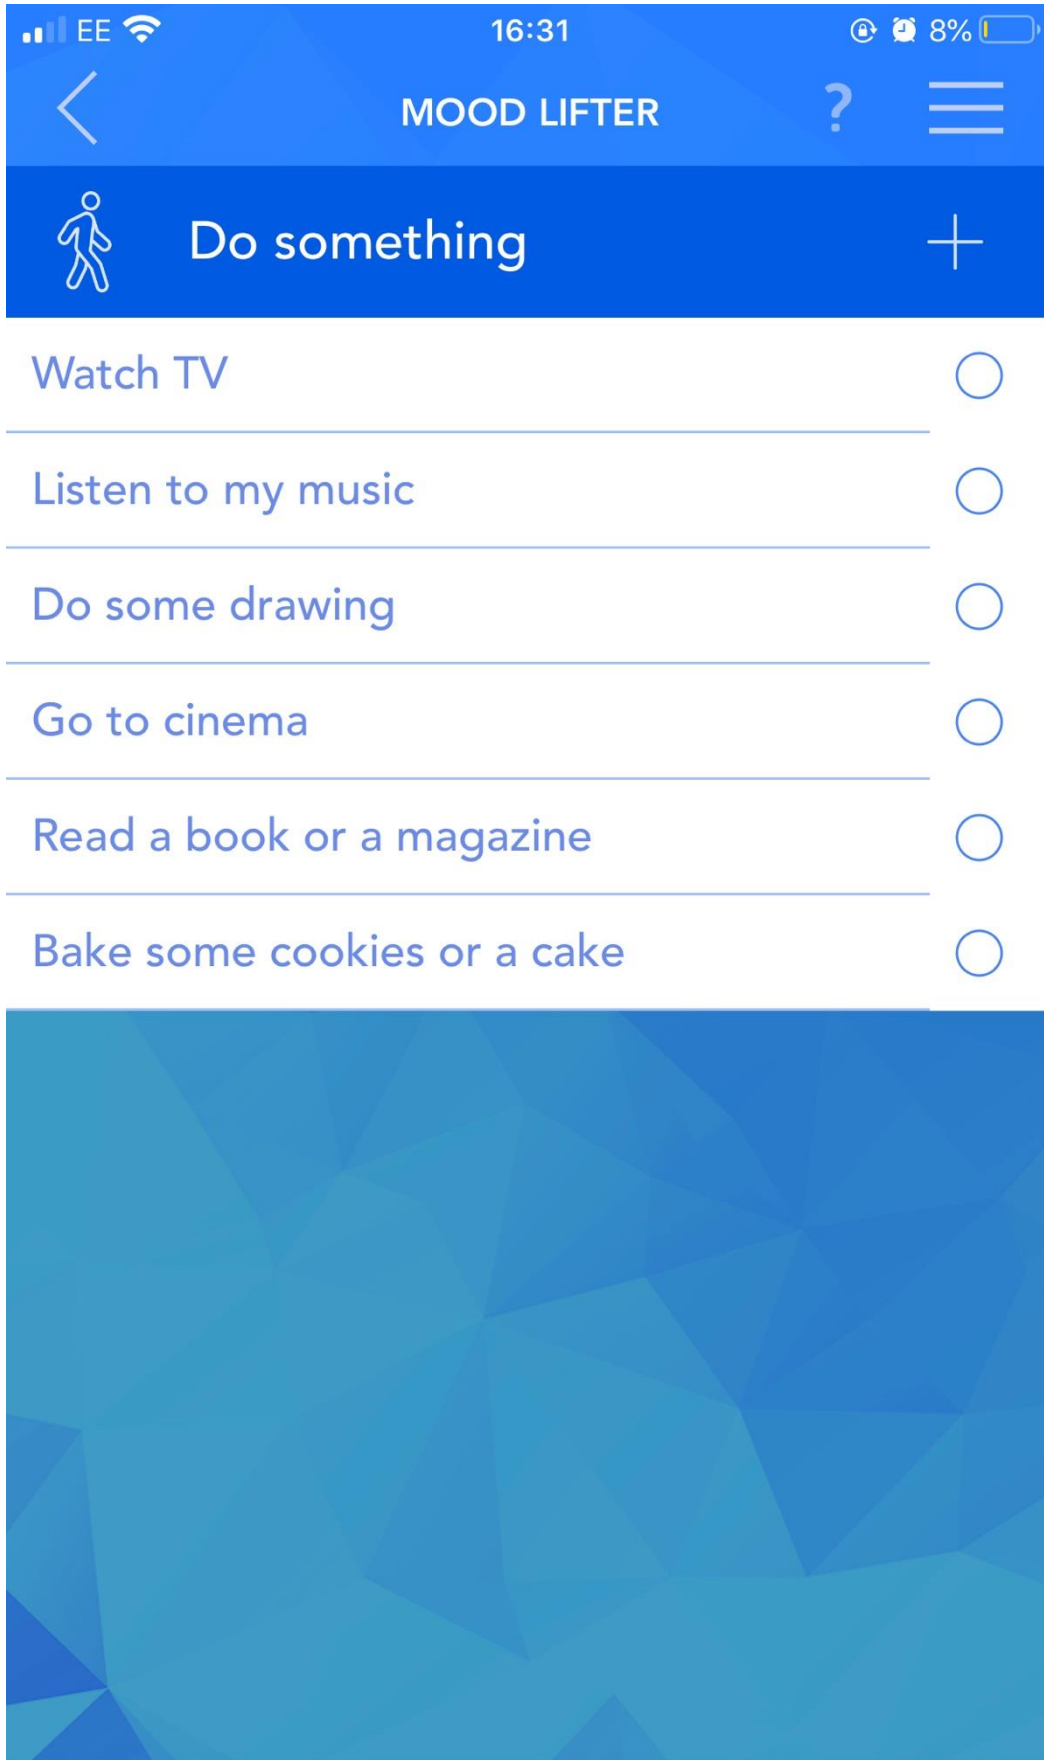

Record what you did

1  
2  
3  
4  
5  
6  
7  
8  
9  
10  
11  
12  
13  
14  
15  
16  
17  
18  
19  
20  
21  
22  
23  
24  
25  
26  
27  
28  
29  
30  
31  
32  
33  
34  
35  
36  
37  
38  
39  
40  
41  
42  
43  
44  
45  
46  
47  
48  
49  
50  
51  
52  
53  
54  
55  
56  
57  
58  
59  
60

The screenshot shows a mobile application interface for an 'Admin Diary'. At the top, there is a status bar with signal strength, 'EE' carrier, Wi-Fi, time '16:25', and 9% battery. Below the status bar is a blue header with a share icon, the text 'VIEW HISTORY', and a hamburger menu icon. The main content area has a blue background with a calendar icon and the text 'Admin Diary'. Below this is a dark grey bar for the date '19/03/2020' with a downward arrow. The entry for 19/03/2020 includes the heading 'Get active:', 'Activities: Walk a mile', and 'Notes: No notes recorded.'. This is followed by another dark grey bar for '17/09/2020' with a downward arrow. The entry for 17/09/2020 includes 'Get active:', 'Activities: Walk a mile', and 'Notes: No notes recorded.'. Below this is a dark grey bar for '13/10/2020' with a downward arrow. The entry for 13/10/2020 includes 'Do something:', 'Activities: Watch TV', and 'Notes: I watched a film and it helped take my mind off things'. The bottom of the screen shows a large, empty light grey rectangular area.

VIEW HISTORY

Admin Diary

19/03/2020

**Get active:**  
**Activities:** Walk a mile  
**Notes:** No notes recorded.

17/09/2020

**Get active:**  
**Activities:** Walk a mile  
**Notes:** No notes recorded.

**Do something:**  
**Activities:** Watch TV  
**Notes:** No notes recorded.

13/10/2020

**Do something:**  
**Activities:** Watch TV  
**Notes:** I watched a film and it helped take my mind off things

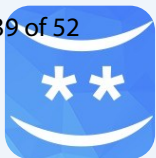

# Blueelce User Guide

## Login

Set your log in PIN number to a number you will remember. You will be asked for your PIN each time you log on.

If you forget your PIN it can be reset by pressing the reset button. Unfortunately you will lose any notes or items you have saved.

## How are you feeling today?

This is the home page where you can check your mood, talk to helplines or friends, or set your mood diary reminder. You can return to the Home page by tapping the top  and selecting home.

## Mood checker

This is the mood wheel – tap the mood that best describes how you are feeling. You can  add a note to explain why you are feeling like this.

## Mood diary

This is a record of the moods you have entered. You will see a calendar and if you select a day you can see all the moods and notes you entered for that day.

## Mood lifter

This is a toolbox of ideas to help you manage your emotions.

## Add notes

Wherever you see ‘record what you did’ or ‘type your notes here’ tap the screen and a box will appear for you to add your notes. Your saved notes will appear in view history.

## Add items

Wherever you see this button you can add your own items. You can do this in most of the mood lifter sections and in the Mood Diary.

## Delete items

You can delete any items that you have added .  
Apple/iOS: swipe left, tap delete

Android: Hold your finger on the item for two seconds. A box will appear and you can click edit, delete or cancel.

## View history

Tap on the menu button and click view history. Here you can view your notes and all the things you entered that you tried to do on each day.

## Privacy

All data you enter is stored on your phone. It is not transmitted or saved anywhere else unless you chose to download or send a copy

## Download your entries

Tap the top right icon on this page to send a copy of the entries you have made to an email address.

## Information

When you see this button you can tap it to find out more information. .

## Set up mood diary reminder

On the Home screen you can set two reminders to record your mood each day. Set the time and click OK.

You can delete reminders by:

Apple/iOS: tap to open timer and select delete.

Android: hold your finger on the reminder time for 2/3 seconds and select the option to delete.

## Exiting Blueelce

Open the top left menu  and select logout.

## Feedback

To send feedback to the Blueelce team open the top left menu  and tap the feedback button.

This will create an email to the Blueelce team..

 **Blueelce is designed to be used alongside face to face work with a mental health worker.**

If Blueelce isn't helping you then discuss this with your mental health worker.

**The effectiveness and acceptability of a smartphone app (BlueIce) for university students experiencing self-harm thoughts/behaviours.**

**Experience of using BlueIce Questionnaire**

1. Roughly how many times did you use BlueIce over the past 6 weeks?

Once or twice

Up to 5 times

6-12 times (up to once per week)

Couple of times per week

More often (please specify)

2. Did you personalise (i.e. add your own ideas to) the following sections of the mood lifter?

Get Active (physical activities)

Do something (get busy)

Good times (photos)

Listen and relax (music)

Thinking traps (download your head)

Contact friends (add 2/3 friends)

Ride it out (soothing toolbox)

3. What sections of BlueIce did you use the most?

4. Did you set reminders to complete the mood diary?

Yes

No

5. Did you use the mood checker section to record your mood?

Yes



1  
2  
3  
4  No  
5  
6

7 **If NO** – were there any reasons why?  
8  
9

10 \_\_\_\_\_  
11  
12 **If YES** – how often did you use it and was it helpful?  
13  
14  
15 \_\_\_\_\_

16 6. Did you use BlueIce when you were distressed and felt like harming yourself?  
17

18  Yes  
19

20  
21  No  
22

23  
24  
25 **If No** – Were there any reasons why you didn't use BlueIce (e.g. didn't need to, forgot,  
26 didn't think it would help). **Got to Question 9**  
27

28  
29  
30 **If Yes** – Over the past 12 weeks how many times did you use BlueIce when you were  
31 thinking of harming yourself?  
32

33  Once or twice  
34

35  Up to 5 times  
36

37  6-12 times (up to once per week)  
38

39  Couple of times per week  
40

41  More often (please specify)  
42  
43  
44

45 7. Did BlueIce ever stop you from harming yourself?  
46

47  
48  Yes  
49

50  
51  No  
52

53 **If no**, why do you think it didn't stop you from harming yourself?  
54

55  
56 **If Yes**, how many times did it stop you from harming yourself?  
57

58  Once or twice  
59

60  Up to 5 times

1  
2  
3  
4  
5  
6  
7  
8  
9  
10  
11  
12  
13  
14  
15  
16  
17  
18  
19  
20  
21  
22  
23  
24  
25  
26  
27  
28  
29  
30  
31  
32  
33  
34  
35  
36  
37  
38  
39  
40  
41  
42  
43  
44  
45  
46  
47  
48  
49  
50  
51  
52  
53  
54  
55  
56  
57  
58  
59  
60

6-12 times (up to once per week)

Couple of times per week

More often (please specify)

8. Which sections of BlueIce helped you most when you were thinking of harming yourself?

9. Were there times when you self-harmed that you didn't use BlueIce

Yes

No

**If Yes**

- What stopped you from using BlueIce (no phone, forgot, feelings too intense)?

10. Were there any parts of BlueIce you found unhelpful, didn't like or didn't use?

11. Please read the statement below and indicate the extent to which you agree or disagree.

|                                             | Strongly Agree | Agree | Not sure | Disagree | Strongly Disagree |
|---------------------------------------------|----------------|-------|----------|----------|-------------------|
| BlueIce was easy to use                     |                |       |          |          |                   |
| BlueIce was helpful                         |                |       |          |          |                   |
| I prefer BlueIce to face to face meetings   |                |       |          |          |                   |
| I would recommend BlueIce to other students |                |       |          |          |                   |

12. Choose a number between 1-10 to show how much your self-harm has improved after using BlueIce?

|   |   |   |   |   |   |   |   |   |    |
|---|---|---|---|---|---|---|---|---|----|
| 1 | 2 | 3 | 4 | 5 | 6 | 7 | 8 | 9 | 10 |
|---|---|---|---|---|---|---|---|---|----|

No improvement

Much improvement

13. Choose a number between 1-10 to show how much your mental health has improved after using BlueIce?

|   |   |   |   |   |   |   |   |   |    |
|---|---|---|---|---|---|---|---|---|----|
| 1 | 2 | 3 | 4 | 5 | 6 | 7 | 8 | 9 | 10 |
|---|---|---|---|---|---|---|---|---|----|

No improvement

Much improvement

14. How many stars would you give BlueIce?

- \*
- \*\*
- \*\*\*
- \*\*\*\*
- \*\*\*\*\*

15. Is life different for you now after using BlueIce and, if so, how is it different?

16. Will you continue to use BlueIce?

- Yes
- No
- Not sure

## Experience of BlueIce Interview

1. What did you think about using BlueIce?

*Example prompt questions:*

- What did you think about the mood diary?
- What did you think about the different techniques suggested?
- Did you like the way it looked / was laid out?
- Was it easy/hard to use?
- Did you personalise BlueIce at all?
- How does using BlueIce compare to other types of support for self-harm?

2. Do you think BlueIce has helped you to manage your self-harm / improve your wellbeing?

*Example prompt questions:*

- What techniques did you try that helped/didn't help?
- What impact did BlueIce have on your self-harm/mood?
- What bits specifically do you think helped / didn't help?
- Do you think using BlueIce helped you learn or practice alternative coping strategies?

3. Why do you think BlueIce helped / didn't help you manage your self-harm and wellbeing?

*Example prompt questions:*

- How does it compare to other types of support you've had?
- Were there any barriers to using BlueIce?
- Do you think it's just BlueIce that isn't helpful for you, or smartphone apps in general?

4. Do you think BlueIce could be helpful for other university students?

*Example prompt questions:*

- Do you think students would use BlueIce?
- What would the disadvantages and advantages be for other students using BlueIce?
- Do you think if a student was struggling to ask for formal support, they may benefit from using BlueIce?

5. Is there anything else you would like to say about BlueIce or about this study, that hasn't yet been covered in the questionnaires or in this interview?

| Umbrella code            | Definition                                                                                                                                                                                                                                                                                                                                                                                        | Examples                                                                                                                                                                                                                                                                                                                                                                                                              |
|--------------------------|---------------------------------------------------------------------------------------------------------------------------------------------------------------------------------------------------------------------------------------------------------------------------------------------------------------------------------------------------------------------------------------------------|-----------------------------------------------------------------------------------------------------------------------------------------------------------------------------------------------------------------------------------------------------------------------------------------------------------------------------------------------------------------------------------------------------------------------|
| User friendly (or not)   | This code encapsulates the general design of BlueIce (i.e. the logo, the colours) as well as being user friendly (i.e. simple, not overwhelming, easy to use). Can also include more general design features e.g. passcode & privacy etc.                                                                                                                                                         | 'Everything looks so happy on the phone. I mean, I like the color. The color is really good. The blue and white'                                                                                                                                                                                                                                                                                                      |
| Engagement               | Participants discussing their engagement (or lack of) with BlueIce, or motivation being a barrier to engage with it / the activities within it. Can also include references to not having the time to use it, or forgetting to use it because they need to be motivated to take those steps to engage. Different to heterogeneity because that's more acknowledging differences.                  | 'for the things with the activity ones, I don't know, umm... for me, it's hard to engage in stuff like that.'<br><br>'I was just lacking the motivation, especially when I'm feeling low '                                                                                                                                                                                                                            |
| Further support required | References to the app lacking an element of interaction, whether it be generally with another human or with a clinician specifically. Can also include general references to BlueIce not being enough and needing more support. Can also include references to it not being 'enough', i.e. it is missing components e.g. psychoeducation or further explanations, not taking enough into account. | 'I think I would need someone there with me and be like, OK, do this and that now really taking me, yeah, through all the steps'                                                                                                                                                                                                                                                                                      |
| Adjunct to therapy       | Participants mentioning that BlueIce could work well alongside / in conjunction with therapy, or it being a useful first step to help get students to seek therapy/ realise they need therapy etc. NOT saying it wouldn't work without therapy and that it has to be alongside therapy.                                                                                                           | 'if it's if the therapist then says like, you know, homework wise or something, I'll always like have a diary. This could be my diary for example and I can note it down. And then because we can forget stuff and I could forget something significant, and then when I have to therapy session we can talk about everything and my feelings on that day and I think it would support yeah the counselling session.' |
| Positive impact          | Positive comments about the mood diary helping students to track their mood, or alter their perspective on how they've been feeling. Also references to the app providing                                                                                                                                                                                                                         | 'I write things down when I'm not feeling well, I write it out, it's kind of like a little bit of relief as well'                                                                                                                                                                                                                                                                                                     |

|                                 |                                                                                                                                                                                                                                                                                                                                                                                                                                                                                                                                   |                                                                                                                                                                                                                                                             |
|---------------------------------|-----------------------------------------------------------------------------------------------------------------------------------------------------------------------------------------------------------------------------------------------------------------------------------------------------------------------------------------------------------------------------------------------------------------------------------------------------------------------------------------------------------------------------------|-------------------------------------------------------------------------------------------------------------------------------------------------------------------------------------------------------------------------------------------------------------|
|                                 | them an outlet / providing relief from negative emotions/emotion regulation, allowing them to vent etc. Also talking about awareness of current mood.                                                                                                                                                                                                                                                                                                                                                                             |                                                                                                                                                                                                                                                             |
| Unhelpful                       | Negative comments about the mood diary / app relating to the red days being unhelpful, not needing to track their mood, or the moods not capturing their emotional ranges.                                                                                                                                                                                                                                                                                                                                                        |                                                                                                                                                                                                                                                             |
| Safe                            | Participants saying that BlueIce is safe to use, it not having risks associated with it or it being helpful for students generally.                                                                                                                                                                                                                                                                                                                                                                                               | 'Ohh no, no risks, no cause it's still like free to use the app whenever and I really didn't see anything on the app that kind of made me feel any negative emotions or anything.'                                                                          |
| Heterogeneity                   | Any references to the individual experience of self-harm or of interventions, including comments about 'personally...' or 'others may be different...', acknowledging the importance of not providing a one size fits all approach.                                                                                                                                                                                                                                                                                               | 'what works for me might not work for another person'<br><br>'I know that some people that would give it a chance, and I think it would be very, you know, helpful for them.'                                                                               |
| Target populations              | Participants saying that BlueIce could be helpful for specific groups of people, i.e., based on their self-harm (e.g. low level or 'new' to SH), mental health status (e.g. people with specific diagnoses like ADHD or dissociation) or demographics (e.g. age, students).                                                                                                                                                                                                                                                       | 'Or maybe for a person even who is like really, you know, a shy person and not so really outgoing. And, you know, maybe doesn't want to talk to therapist or something for those people, maybe, you know, an app would be better option.'                   |
| Barriers to other interventions | Discussion of barriers to other services <b>but</b> only if this relates to BlueIce somehow, e.g., it would help to overcome these barriers like not having a waiting list or something. Include other digital interventions in this as well (helplines, websites, face to face). Accessible also relates to the ease of access of BlueIce both in the first instance (i.e. not having to join a wait list etc) and also in the moment (i.e. out and about). Includes references to it being on a phone which is easily accessed. | 'also for the university, I know there's a long list waiting list for people to get therapy and stuff'<br><br>'because obviously it's an app and we are all just you know on our phones at the moment, phone is like, what would life be without the phone' |

1  
2  
3  
4  
5  
6  
7  
8  
9  
10  
11  
12  
13  
14  
15  
16  
17  
18  
19  
20  
21  
22  
23  
24  
25  
26  
27  
28  
29  
30  
31  
32  
33  
34  
35  
36  
37  
38  
39  
40  
41  
42  
43  
44  
45  
46

|         |                                                                                                                                                                                                                                                                                                          |                                                                                               |
|---------|----------------------------------------------------------------------------------------------------------------------------------------------------------------------------------------------------------------------------------------------------------------------------------------------------------|-----------------------------------------------------------------------------------------------|
| Toolbox | References to it being a helpful toolbox (e.g. everything in one place). Also comments on the extent of personalisation available of the toolbox, i.e. whether it's enough or not enough. Negative comments specifically about the suggestions in the mood lifter (e.g. going to the cinema or whatever) | 'it's not really personalized as well you know like obviously it's just like a general thing' |
|---------|----------------------------------------------------------------------------------------------------------------------------------------------------------------------------------------------------------------------------------------------------------------------------------------------------------|-----------------------------------------------------------------------------------------------|

For peer review only

| Categories                           | Codes | Barrier                  | Facilitator               |
|--------------------------------------|-------|--------------------------|---------------------------|
| <i>Intervention Specific factors</i> |       |                          |                           |
| <b>Suitability</b>                   |       | Heterogeneity            | Target populations        |
| <b>Usability</b>                     |       | Not user friendly        | User friendly             |
| <b>Acceptability</b>                 |       |                          | Safe                      |
|                                      |       | Unhelpful                |                           |
|                                      |       | Toolbox                  | Personalisation options   |
| <i>Person Specific Factors</i>       |       |                          |                           |
| <b>Motivation</b>                    |       | Engagement barriers      |                           |
|                                      |       |                          | Positive impact           |
| <b>Capability</b>                    |       | Motivation               |                           |
| <b>Opportunity</b>                   |       | Further support required |                           |
|                                      |       |                          | Barriers to other support |
|                                      |       |                          | Adjunct to therapy        |



Table 2

CONSORT checklist of information to include when reporting a pilot trial

| Section/topic and item No  | Standard checklist item                                                                                                 | Extension for pilot trials                                                                                                                          | Page No where item is reported |
|----------------------------|-------------------------------------------------------------------------------------------------------------------------|-----------------------------------------------------------------------------------------------------------------------------------------------------|--------------------------------|
| Title and abstract         |                                                                                                                         |                                                                                                                                                     |                                |
| 1a                         | Identification as a randomised trial in the title                                                                       | Identification as a pilot or feasibility randomised trial in the title                                                                              | 1                              |
| 1b                         | Structured summary of trial design, methods, results, and conclusions (for specific guidance see CONSORT for abstracts) | Structured summary of pilot trial design, methods, results, and conclusions (for specific guidance see CONSORT abstract extension for pilot trials) | 2                              |
| Introduction               |                                                                                                                         |                                                                                                                                                     |                                |
| Background and objectives: |                                                                                                                         |                                                                                                                                                     |                                |
| 2a                         | Scientific background and explanation of rationale                                                                      | Scientific background and explanation of rationale for future definitive trial, and reasons for randomised pilot trial                              | 4                              |
| 2b                         | Specific objectives or hypotheses                                                                                       | Specific objectives or research questions for pilot trial                                                                                           | 4                              |
| Methods                    |                                                                                                                         |                                                                                                                                                     |                                |
| Trial design:              |                                                                                                                         |                                                                                                                                                     |                                |
| 3a                         | Description of trial design (such as parallel, factorial) including allocation ratio                                    | Description of pilot trial design (such as parallel, factorial) including allocation ratio                                                          | 4                              |
| 3b                         | Important changes to methods after trial commencement (such as eligibility criteria), with reasons                      | Important changes to methods after pilot trial commencement (such as eligibility criteria), with reasons                                            | N/A                            |
| Participants:              |                                                                                                                         |                                                                                                                                                     |                                |
| 4a                         | Eligibility criteria for participants                                                                                   |                                                                                                                                                     | 5                              |
| 4b                         | Settings and locations where the data were collected                                                                    |                                                                                                                                                     | 5                              |
| 4c                         |                                                                                                                         | How participants were identified and consented                                                                                                      | 5                              |

| Section/topic and item No         | Standard checklist item                                                                                                               | Extension for pilot trials                                                                                                                                   | Page No where item is reported |
|-----------------------------------|---------------------------------------------------------------------------------------------------------------------------------------|--------------------------------------------------------------------------------------------------------------------------------------------------------------|--------------------------------|
| Interventions:                    |                                                                                                                                       |                                                                                                                                                              |                                |
| 5                                 | The interventions for each group with sufficient details to allow replication, including how and when they were actually administered |                                                                                                                                                              | 6                              |
| Outcomes:                         |                                                                                                                                       |                                                                                                                                                              |                                |
| 6a                                | Completely defined prespecified primary and secondary outcome measures, including how and when they were assessed                     | Completely defined prespecified assessments or measurements to address each pilot trial objective specified in 2b, including how and when they were assessed | 6,7                            |
| 6b                                | Any changes to trial outcomes after the trial commenced, with reasons                                                                 | Any changes to pilot trial assessments or measurements after the pilot trial commenced, with reasons                                                         | N/A                            |
| 6c                                |                                                                                                                                       | If applicable, prespecified criteria used to judge whether, or how, to proceed with future definitive trial                                                  | N/A                            |
| Sample size:                      |                                                                                                                                       |                                                                                                                                                              |                                |
| 7a                                | How sample size was determined                                                                                                        | Rationale for numbers in the pilot trial                                                                                                                     | 5,6                            |
| 7b                                | When applicable, explanation of any interim analyses and stopping guidelines                                                          |                                                                                                                                                              | N/A                            |
| Randomisation:                    |                                                                                                                                       |                                                                                                                                                              |                                |
| Sequence generation:              |                                                                                                                                       |                                                                                                                                                              |                                |
| 8a                                | Method used to generate the random allocation sequence                                                                                |                                                                                                                                                              | N/A                            |
| 8b                                | Type of randomisation; details of any restriction (such as blocking and block size)                                                   | Type of randomisation(s); details of any restriction (such as blocking and block size)                                                                       | N/A                            |
| Allocation concealment mechanism: |                                                                                                                                       |                                                                                                                                                              |                                |
| 9                                 | Mechanism used to implement the random allocation sequence (such as                                                                   |                                                                                                                                                              | N/A                            |

| Section/topic and item No                             | Standard checklist item                                                                                                                        | Extension for pilot trials                                                                                                                                                            | Page No where item is reported |
|-------------------------------------------------------|------------------------------------------------------------------------------------------------------------------------------------------------|---------------------------------------------------------------------------------------------------------------------------------------------------------------------------------------|--------------------------------|
|                                                       | sequentially numbered containers), describing any steps taken to conceal the sequence until interventions were assigned                        |                                                                                                                                                                                       |                                |
| Implementation:                                       |                                                                                                                                                |                                                                                                                                                                                       |                                |
| 10                                                    | Who generated the random allocation sequence, enrolled participants, and assigned participants to interventions                                |                                                                                                                                                                                       | N/A                            |
| Blinding:                                             |                                                                                                                                                |                                                                                                                                                                                       |                                |
| 11a                                                   | If done, who was blinded after assignment to interventions (eg, participants, care providers, those assessing outcomes) and how                |                                                                                                                                                                                       | N/A                            |
| 11b                                                   | If relevant, description of the similarity of interventions                                                                                    |                                                                                                                                                                                       |                                |
| Analytical methods:                                   |                                                                                                                                                |                                                                                                                                                                                       |                                |
| 12a                                                   | Statistical methods used to compare groups for primary and secondary outcomes                                                                  | Methods used to address each pilot trial objective whether qualitative or quantitative                                                                                                | 7,8                            |
| 12b                                                   | Methods for additional analyses, such as subgroup analyses and adjusted analyses                                                               | Not applicable                                                                                                                                                                        | N/A                            |
| Results                                               |                                                                                                                                                |                                                                                                                                                                                       |                                |
| Participant flow (a diagram is strongly recommended): |                                                                                                                                                |                                                                                                                                                                                       |                                |
| 13a                                                   | For each group, the numbers of participants who were randomly assigned, received intended treatment, and were analysed for the primary outcome | For each group, the numbers of participants who were approached and/or assessed for eligibility, randomly assigned, received intended treatment, and were assessed for each objective | 6                              |
| 13b                                                   | For each group, losses and exclusions after randomisation, together with reasons                                                               |                                                                                                                                                                                       | N/A                            |

| Section/topic and item No | Standard checklist item                                                                                                                           | Extension for pilot trials                                                                                                                                                     | Page No where item is reported |
|---------------------------|---------------------------------------------------------------------------------------------------------------------------------------------------|--------------------------------------------------------------------------------------------------------------------------------------------------------------------------------|--------------------------------|
| Recruitment:              |                                                                                                                                                   |                                                                                                                                                                                |                                |
| 14a                       | Dates defining the periods of recruitment and follow-up                                                                                           |                                                                                                                                                                                | 6                              |
| 14b                       | Why the trial ended or was stopped                                                                                                                | Why the pilot trial ended or was stopped                                                                                                                                       | N/A                            |
| Baseline data:            |                                                                                                                                                   |                                                                                                                                                                                |                                |
| 15                        | A table showing baseline demographic and clinical characteristics for each group                                                                  |                                                                                                                                                                                | 9, 10                          |
| Numbers analysed:         |                                                                                                                                                   |                                                                                                                                                                                |                                |
| 16                        | For each group, number of participants (denominator) included in each analysis and whether the analysis was by original assigned groups           | For each objective, number of participants (denominator) included in each analysis. If relevant, these numbers should be by randomised group                                   | 10,11                          |
| Outcomes and estimation:  |                                                                                                                                                   |                                                                                                                                                                                |                                |
| 17a                       | For each primary and secondary outcome, results for each group, and the estimated effect size and its precision (such as 95% confidence interval) | For each objective, results including expressions of uncertainty (such as 95% confidence interval) for any estimates. If relevant, these results should be by randomised group | 10,11                          |
| 17b                       | For binary outcomes, presentation of both absolute and relative effect sizes is recommended                                                       | Not applicable                                                                                                                                                                 | N/A                            |
| Ancillary analyses:       |                                                                                                                                                   |                                                                                                                                                                                |                                |
| 18                        | Results of any other analyses performed, including subgroup analyses and adjusted analyses, distinguishing prespecified from exploratory          | Results of any other analyses performed that could be used to inform the future definitive trial                                                                               | N/A                            |
| Harms:                    |                                                                                                                                                   |                                                                                                                                                                                |                                |
| 19                        | All important harms or unintended effects in each group (for specific guidance see CONSORT for harms)                                             |                                                                                                                                                                                | N/A                            |
| 19a                       |                                                                                                                                                   | If relevant, other important unintended consequences                                                                                                                           | N/A                            |

| Section/topic and item No | Standard checklist item                                                                                          | Extension for pilot trials                                                                                                                          | Page No where item is reported |
|---------------------------|------------------------------------------------------------------------------------------------------------------|-----------------------------------------------------------------------------------------------------------------------------------------------------|--------------------------------|
| Discussion                |                                                                                                                  |                                                                                                                                                     |                                |
| Limitations:              |                                                                                                                  |                                                                                                                                                     |                                |
| 20                        | Trial limitations, addressing sources of potential bias, imprecision, and, if relevant, multiplicity of analyses | Pilot trial limitations, addressing sources of potential bias and remaining uncertainty about feasibility                                           | 21                             |
| Generalisability:         |                                                                                                                  |                                                                                                                                                     |                                |
| 21                        | Generalisability (external validity, applicability) of the trial findings                                        | Generalisability (applicability) of pilot trial methods and findings to future definitive trial and other studies                                   | 21                             |
| Interpretation:           |                                                                                                                  |                                                                                                                                                     |                                |
| 22                        | Interpretation consistent with results, balancing benefits and harms, and considering other relevant evidence    | Interpretation consistent with pilot trial objectives and findings, balancing potential benefits and harms, and considering other relevant evidence | 18,19                          |
| 22a                       |                                                                                                                  | Implications for progression from pilot to future definitive trial, including any proposed amendments                                               | 21                             |
| Other information         |                                                                                                                  |                                                                                                                                                     |                                |
| Registration:             |                                                                                                                  |                                                                                                                                                     |                                |
| 23                        | Registration number and name of trial registry                                                                   | Registration number for pilot trial and name of trial registry                                                                                      | N/A                            |
| Protocol:                 |                                                                                                                  |                                                                                                                                                     |                                |
| 24                        | Where the full trial protocol can be accessed, if available                                                      | Where the pilot trial protocol can be accessed, if available                                                                                        | N/A                            |
| Funding:                  |                                                                                                                  |                                                                                                                                                     |                                |
| 25                        | Sources of funding and other support (such as supply of drugs), role of funders                                  |                                                                                                                                                     | N/A                            |
| 26                        |                                                                                                                  | Ethical approval or approval by research review committee, confirmed with reference number                                                          | 8                              |

# BMJ Open

## Is a smartphone application (BlueIce) acceptable and safe for university students who self-harm: an open study

|                                 |                                                                                                                                                                                                                                                                                                              |
|---------------------------------|--------------------------------------------------------------------------------------------------------------------------------------------------------------------------------------------------------------------------------------------------------------------------------------------------------------|
| Journal:                        | <i>BMJ Open</i>                                                                                                                                                                                                                                                                                              |
| Manuscript ID                   | bmjopen-2022-069862.R2                                                                                                                                                                                                                                                                                       |
| Article Type:                   | Original research                                                                                                                                                                                                                                                                                            |
| Date Submitted by the Author:   | 03-Oct-2023                                                                                                                                                                                                                                                                                                  |
| Complete List of Authors:       | Cliffe, Bethany; University of Bath,<br>Moore, Emma; Oxford Health NHS Mental Health Trust, Child and Adolescent Mental Health Services<br>Whittle, Kathryn; Oxford Health NHS Mental Health Trust, Child and Adolescent Mental Health Services<br>Stallard, Paul; University of Bath, Department for Health |
| <b>Primary Subject Heading</b>: | Mental health                                                                                                                                                                                                                                                                                                |
| Secondary Subject Heading:      | Public health, Qualitative research                                                                                                                                                                                                                                                                          |
| Keywords:                       | MENTAL HEALTH, Suicide & self-harm < PSYCHIATRY, Telemedicine < BIOTECHNOLOGY & BIOINFORMATICS                                                                                                                                                                                                               |
|                                 |                                                                                                                                                                                                                                                                                                              |

SCHOLARONE™  
Manuscripts



I, the Submitting Author has the right to grant and does grant on behalf of all authors of the Work (as defined in the below author licence), an exclusive licence and/or a non-exclusive licence for contributions from authors who are: i) UK Crown employees; ii) where BMJ has agreed a CC-BY licence shall apply, and/or iii) in accordance with the terms applicable for US Federal Government officers or employees acting as part of their official duties; on a worldwide, perpetual, irrevocable, royalty-free basis to BMJ Publishing Group Ltd ("BMJ") its licensees and where the relevant Journal is co-owned by BMJ to the co-owners of the Journal, to publish the Work in this journal and any other BMJ products and to exploit all rights, as set out in our [licence](#).

The Submitting Author accepts and understands that any supply made under these terms is made by BMJ to the Submitting Author unless you are acting as an employee on behalf of your employer or a postgraduate student of an affiliated institution which is paying any applicable article publishing charge ("APC") for Open Access articles. Where the Submitting Author wishes to make the Work available on an Open Access basis (and intends to pay the relevant APC), the terms of reuse of such Open Access shall be governed by a Creative Commons licence – details of these licences and which [Creative Commons](#) licence will apply to this Work are set out in our licence referred to above.

Other than as permitted in any relevant BMJ Author's Self Archiving Policies, I confirm this Work has not been accepted for publication elsewhere, is not being considered for publication elsewhere and does not duplicate material already published. I confirm all authors consent to publication of this Work and authorise the granting of this licence.

1  
2  
3  
4  
5 Is a smartphone application (BlueIce) acceptable and safe for university  
6 students who self-harm: an open study  
7  
8  
9  
10

11  
12 Corresponding author:

13 Bethany Cliffe

14 [Bc731@bath.ac.uk](mailto:Bc731@bath.ac.uk)

15 Department for Health

16 University of Bath

17 Claverton Down Campus

18 BA2 7AY

19 Bath

20 UK  
21  
22  
23  
24

25 Emma Moore

26 Child and Adolescent Mental Health Services

27 Oxford Health NHS Trust

28 Bristol

29 UK  
30  
31

32 Kathryn Whittle

33 Child and Adolescent Mental Health Services

34 Oxford Health NHS Trust

35 Bristol

36 UK  
37  
38

39 Paul Stallard

40 Department for Health

41 University of Bath

42 Bath

43 UK  
44  
45

46 Word Count: 9256  
47  
48  
49  
50  
51  
52  
53  
54  
55  
56  
57  
58  
59  
60



## Abstract

Background: Many university students self-harm but few receive support. Smartphone apps have been identified as acceptable sources of support for students who self-harm, but the use of self-harm prevention apps is yet to be explored in this population.

Objective: This study sought to explore the acceptability and safety of a specific app (BlueIce) for university students who self-harm.

Methods: This was an exploratory, mixed methods study with 15 university students attending university wellbeing services with self-harming thoughts and/or behaviours. BlueIce was offered alongside the face-to-face support provided by the wellbeing service. Self-harming thoughts and behaviours, coping self-efficacy, and symptoms of anxiety and depression were measured before and after using BlueIce for 6 weeks. Follow up interviews were also undertaken to explore how students perceived BlueIce in more in depth.

Results: Following app use, there were statistically significant reductions in symptoms of anxiety (baseline M 12.47, SD 4.42; follow-up M 10, SD 4.16)  $t(14) = 2.26, P = .040, d = .58$  and depression (baseline M 16.5, SD 5.17, follow-up M 12.27, SD 3.66)  $t(13) = 5.50, P < .001, d = 1.47$ . Qualitative findings showed participants found BlueIce to be acceptable, safe and helpful, and reported that they were more able to cope with difficult feelings and better understand their self-harm triggers following use of the app.

Conclusion: BlueIce was an acceptable, safe and helpful source of support for university students struggling with self-harm thoughts and/or behaviours. This builds on previous findings with adolescents and suggests that BlueIce could be a particularly acceptable and helpful resource for university students.

### Strengths and limitations

- The first study to evaluate a self-help smartphone app with university students who self-harm
- Qualitative findings were evaluated using a pre-existing framework for evaluating engagement with digital interventions
- Semi-structured interviews provided rich feedback on how students perceived the app.
- Recruitment challenges meant a small sample size for the quantitative analyses.
- Students were only recruited from one university.

## Introduction

### Self-harm among university students

Self-harm, defined broadly in the current study as any intentional act of harm or injury directed towards the self irrespective of motivation [1] is particularly prevalent at universities, with a worldwide systematic review finding university students to be twice as likely to self-harm than their non-student peers [2]. In this review, studies measured self-harm on a range of scales, including lifetime, past four weeks, six months, 12 months and 3 years. The higher prevalence of self-harm amongst students may result from the numerous challenges that they face while at university, associated with academic, financial, geographical and social stressors, which leave them more vulnerable to experiencing mental health difficulties [3]. A Canadian study estimated that around a quarter of students will self-harm while at university [4], however, self-harm often goes unreported due to the shame, stigma and misconceptions surrounding it that leaves many students unable to discuss their self-harm [5, 6, 7, 8, 9, 10]. This means that prevalence rates are often underestimated and that very few students who self-harm ever seek or receive professional help [11, 12]. This suggests that alternative options for support should be explored so that students who do not yet feel ready or able to discuss self-harm can still access other forms of support.

In a qualitative study, 25 United Kingdom (UK) university students with lived experience were interviewed about their opinions on support available for self-harm [13]. This study found that whilst some students appreciated the benefits of human connection that came with professional support, several barriers to seeking help were identified [13]. These included long waiting lists for mental health services, not wanting to take up support when they believed others may need it more, worrying about receiving a negative response upon disclosing self-harm, and feeling embarrassed and ashamed of self-harming. This study also explored how students perceive digital interventions, and found that they were viewed positively. In particular, students valued the anonymity, accessibility and convenience they can offer. In addition, students reported that they felt less exposed and inhibited compared to speaking with someone face-to-face, and noted how they always have their phones on them so could access a smartphone-based digital intervention anytime and anywhere [13].

These findings have been corroborated in the USA, with a survey of 479 college/university students showing that around three quarters had used or were using a digital mental health intervention, and high satisfaction rates were reported [14]. Interestingly, 91% of participants in this study indicated that they had experienced barriers to accessing mental health services. This further suggests that digital mental health interventions can bridge the gap between students and mental health support.

Research has also investigated the effectiveness of digital mental health interventions for university students. A systematic review found that digital interventions are effective in reducing symptoms of anxiety and depression, while also improving psychology wellbeing among students [15]. This was also found in a randomised controlled trial with UK university students, where use of a mental health app significantly improved anxiety and depression scores compared to a control group, and that these effects were sustained at follow up [16]. It therefore seems as

1  
2  
3 though digital interventions can be both acceptable to university students and effective in  
4 improving their psychological wellbeing.  
5

6  
7 Given the difficulties students face in seeking professional support for self-harm, coupled with  
8 the perceived advantages of digital support, a smartphone application (app) seems like a valued  
9 option. Wider research has also suggested that digital interventions for self-harm can be helpful  
10 and produce positive outcomes for other [17]. However, despite these potential benefits, no prior  
11 research has been conducted where university students have used and evaluated a smartphone  
12 app specifically developed to help manage self-harm [18].  
13

### 14 BlueIce

15  
16 A self-harm prevention app (BlueIce) has been evaluated with 44 UK adolescents aged 12-17  
17 attending child and adolescent mental health services. Use of BlueIce was associated with a  
18 reduction in symptoms of anxiety and depression, as well as a reduction in the frequency of self-  
19 harm behaviours [19]. Qualitative findings also supported the app being acceptable, helpful and  
20 safe to use [20]. Given the positive findings from this app with adolescents (up to the age of 18  
21 years), preliminary work subsequently investigated whether it could be acceptable to UK  
22 university students. In qualitative interviews, 25 students were shown screenshots of the app  
23 while its functionality was explained to them and they were asked to provide initial feedback on  
24 the concept of the app and its perceived suitability for university students. Feedback was positive  
25 with university students believing that BlueIce could help them manage their self-harm while  
26 also promoting positive mental wellbeing [21]. Students described how they believed BlueIce  
27 could provide relief in moments of distress by offering them distractions or outlets for their  
28 feelings, while also offering them longer term coping strategies to help manage their emotions.  
29  
30  
31

32 Overall, it seems as though BlueIce is an effective and appealing intervention for self-harm that  
33 could also be beneficial to university students. However, while the perceived acceptability of  
34 BlueIce for university students has been initially explored in qualitative interviews, this is yet to  
35 be corroborated by students actually using the app. This study aims to build on previous work by  
36 exploring the acceptability and safety of BlueIce for university students using the app alongside  
37 attending university wellbeing services.  
38  
39

## 40 Methods

### 41 Design

42  
43 This was an exploratory, open, mixed-methods study employing pre- and post-intervention  
44 questionnaires and follow-up interviews.  
45  
46

### 47 Patient and public involvement

48  
49 This research was informed by participants' responses in a previous study [13] who gave  
50 guidance on how best to evaluate interventions for self-harm, meaning their expertise contributed  
51 to the choice of measures used here.  
52

### 53 Recruitment

54  
55 Participants were students at one UK University (there were no restrictions around year of study  
56 or degree type) who were recruited via the university's mental health services. This sample was  
57  
58  
59

1  
2  
3 chosen to ensure that students had support in place should the app not be helpful, whilst being  
4 able to explore the safety of using the app in this population. The wellbeing service at this  
5 university is comprised of trained counsellors, wellbeing advisors and mental health advisors.  
6 They offer various forms of mental health support to students experiencing mild mental health  
7 difficulties, or they are able to direct students to more appropriate external specialist support if  
8 required. Help available through the university includes talking therapy, counselling, workshops,  
9 support groups and self-help resources. Typically, support is available both virtually and in  
10 person on the university campus.  
11  
12

13 Wellbeing staff were informed about the study and the intervention by the researcher, and were  
14 asked to highlight the study to any students meeting the inclusion criteria stated below. Posters  
15 advertising the study were placed in the waiting room so students were also able to directly sign  
16 up for the study. Interested students were directed to an online information sheet with space to  
17 enter their email to receive more information about the study. They were then contacted by the  
18 researcher (BC) who discussed the study with them either over a call on Microsoft Teams or over  
19 email.  
20  
21

22  
23 Students were eligible to participate if:

- 24 1) They were currently (within the past two months) experiencing self-harm thoughts or  
25 behaviours
- 26 2) They were receiving/due to receive counselling or wellbeing support from the  
27 university services
- 28 3) They were willing to participate
- 29 4) They owned a smartphone running iOS or Android.  
30

31  
32 Current self-harm was defined as within the past two months in line with the definition used  
33 within the K-SADS [22]. This was deemed appropriate to account for the often sporadic and  
34 spontaneous nature of self-harm. There were no exclusion criteria, including no specific  
35 exclusion criteria for participants who may have been at risk of suicide. Given the broad  
36 definition of self-harm used in this study, differentiations were not made between suicidal or  
37 non-suicidal self-harm, meaning some participants in this study may have been experiencing  
38 suicidal thoughts. A broad definition was used to capture a range of self-harm experiences, due  
39 to the heterogeneous nature of self-harm. Clinical judgement was used on an individual case  
40 basis, as all potential participants were discussed with the university wellbeing service team lead  
41 to confirm suitability. All students who were interested in taking part were deemed suitable by  
42 the wellbeing team lead.  
43  
44

45  
46 An information power approach was taken to determine the adequacy of the sample size for the  
47 qualitative analysis. This dictates that the sample size required is dictated by the richness of the  
48 interview data, whereby if participants provide thorough and in-depth responses, fewer  
49 participants are required to address the research question. Given the narrow aim of the study, the  
50 specificity of the experiences of the sample, the previous findings regarding the acceptability of  
51 BlueIce, and the in-depth dialogue within the interviews, a smaller sample of 10 participants was  
52 appropriate to address the research aims [23]. A further 5 participants completed the quantitative  
53 questionnaire but did not want to take part in an interview.  
54  
55  
56  
57  
58  
59

## Intervention

BlueIce (<https://www.oxfordhealth.nhs.uk/blueice/>) was co-produced with young people with lived experience of self-harm, alongside clinical staff and academics. It has therapeutic grounding in both cognitive behavioural therapy and dialectical behavioural therapy [24] and was developed in line with guidance from the Medical Research Council [25]. In terms of safety, the app is pin-protected and no data is shared outside of the app. BlueIce contains a mood diary, emergency contacts and mood lifting activities that the user can add to and personalise. The activities are informed by common reasons people self-harm and, again, have therapeutic underpinnings. They include photographs, music, physical activities, guided mindfulness recordings and breathing exercises, a thought diary, distress tolerance techniques, and phone numbers of people to contact when at risk of self-harming [24]. Currently, BlueIce is freely available on a prescription basis (i.e., a mental health professional can ‘prescribe’ it to young people to use for free using a single-use access code) within participating child and adolescent mental health services, with the aim of becoming freely available to download via common app stores once the outcomes have been established. Please see appendix 1 for screenshots of the app.

## Procedure

Data collection occurred between March 2021 and February 2022. Consent forms, baseline and post-use questionnaire data were collected using the Online Surveys software (<https://www.onlinesurveys.ac.uk/>). Post-use interviews for participants were conducted using Microsoft Teams and were recorded using the within-software capabilities. Once consent and baseline questionnaires were completed, participants were sent a text containing a unique link to download BlueIce. They were emailed a user guide (please see appendix 2) and a video demonstrating how to use the app. Participants were then free to use the app as they wished and were able to keep the app after the study ended. They attended treatment as usual with the university mental health services during the study but had no other contact with the research team until the follow-up questionnaires and interview six weeks later. No remuneration was provided to participants.

## Measures

*Self-Harm:* To measure self-harm, the Alexian Brothers Urge to Self Injure Scale (ABUSI) [26] and the Ottawa Self-injury Inventory [27] were administered. The Ottawa self-injury Inventory includes a subscale about the addictive nature of self-harm, which was removed for the purposes of this study as it was deemed not to be necessary to address our research aims. These measures were chosen to capture both self-harm urges and behaviours, as there is evidence to suggest that thoughts of self-harm can still provide affect regulation [28]. Moreover, it has been found that even students who do not currently self-harm can still struggle significantly with urges to [13].

*Anxiety:* The Generalised Anxiety Disorder-7 (GAD-7) [29] is a brief measure that has shown good sensitivity at screening for anxiety disorders. Scores of 5 suggest mild anxiety, 10 suggest moderate anxiety and 15 suggest severe anxiety. It has also been well validated for use with university students [30, 31, 32].

*Depression:* The Patient Health Questionnaire-9 (PHQ-9) [33] is commonly used, has strong psychometric properties and has previously been used in a sample of UK university students

1  
2  
3 [33]. A score of 5-9 suggests mild depression, 10-14 moderate depression, 15-19 moderately  
4 severe depression, and a score of 20-27 suggests severe depression.  
5

6  
7 *Coping*: The Coping Self-efficacy scale [34] consists of three subscales: stopping unpleasant  
8 emotions and thoughts, using problem-focused coping, and seeking support from family and  
9 friends. The total maximum score is 260, with greater coping self-efficacy indicated by higher  
10 scores. This measure has good psychometric properties [34] and has previously been used with  
11 university students who self-harm [35].  
12

13  
14 *Acceptability of BlueIce*: Following the six-week intervention period, participants were asked to  
15 complete a questionnaire about the acceptability of BlueIce [19, 20]. This questionnaire was  
16 developed by the researchers and explores engagement with the app, experience of using the app,  
17 and any impact that the app has had. Please see appendix 3.  
18

### 19 Interview Schedule

20 Semi-structured interviews were conducted following the trial period that explored participants'  
21 experiences of using BlueIce and any impact they perceived it to have had on their mental  
22 wellbeing. The interviews were semi-structured and lasted between 15 and 45 minutes (M =  
23 24.6, SD = 10.34). The interview schedule was designed by BC and was informed by previous  
24 interview schedules used to determine the acceptability of BlueIce with adolescents [20] and  
25 university students [21] (please see appendix 4). This began with an open question 'what did you  
26 think about BlueIce', with prompt questions asking for feedback on specific elements of the app  
27 used if participants struggled to answer. Questions were also included that asked about any  
28 perceived impact of BlueIce and whether they believed BlueIce could be helpful for other  
29 university students.  
30  
31

### 32 Data analysis

33 Descriptive statistics were used to summarise the sample with regards to demographic  
34 characteristics, self-harm characteristics and anxiety and depression symptomatology. Paired  
35 samples t-tests were used to assess pre-post change on quantitative measures.  
36  
37

38  
39 Follow up interviews were analysed using qualitative content analysis [36], to allow for both an  
40 exploration and quantification of the qualitative data. The transcripts were first transcribed  
41 verbatim by BC. All three coders (BC, KW, and EM) then read and re-read the transcripts until  
42 they had become immersed in the data. Three transcripts were picked at random for BC, KW and  
43 EM to code in order to develop a coding frame (please see appendix 5). No more than 10 key  
44 codes in the frame were aimed for, so as not to have more codes than transcripts, but ultimately  
45 11 were settled on [37]. The rest of the transcripts were then independently coded in batches of  
46 two transcripts at a time, after which the three coders met to discuss and make any necessary  
47 adaptations to the coding frame. As there were more than two coders, Cronbach's alpha was used  
48 to measure inter-coder reliability, which suggested good agreement,  $\alpha = .79$  [38].  
49  
50

51  
52 While the codes and the coding frame were developed inductively and independently, BC, KW  
53 and EM identified that the codes aligned with a pre-existing framework of engagement with  
54 digital interventions [39]. The codes were therefore organised relative to the categories within  
55 this framework during analysis (please see appendix 6). The framework is divided into  
56  
57  
58  
59

1  
2  
3 intervention-specific factors ('suitability', 'usability' and 'acceptability') and person-specific  
4 factors ('motivation', 'capability' and 'opportunity'), with codes exemplifying each category and  
5 barriers and facilitators to each. To operationalise this framework within the context of our  
6 findings, BC, KW and EM developed definitions for each of these categories:  
7

### 8 9 *Intervention-specific factors*

10 Suitability: The suitability (or not) of this intervention with this population specifically, i.e.,  
11 whether it could be feasibly implemented in this population.  
12

13 Usability: Factors affecting the overall experience of using the app (e.g. enjoyment, ease of use)  
14 either positively or negatively to determine whether the app is fit for purpose.  
15

16  
17 Acceptability: Specific factors or features of the intervention (relating to the content and  
18 purpose) that the target population liked or disliked, as well as more general, overall perception  
19 of the app as acceptable or not.  
20

### 21 *Person-specific factors*

22 Motivation: Whether the target population had enough reason to want to use it or not, both  
23 initially and more long term, because of the perceived need for the app or its perceived impact/  
24 helpfulness. This relates to more internal drive factors, such as the extent to which they wanted  
25 to use it.  
26

27  
28 Capability: Whether the individual was able to use it or not and the barriers to this. Whereas  
29 motivation relates to more personal factors, capability relates more to externally influencing  
30 factors, such as being too busy.  
31

32  
33 Opportunity: Factors which improved or reduced participants' opportunities to receive support  
34 (for mental health and/or self-harm) via the app, as well as opportunities that the app provides or  
35 does not provide.  
36

### 37 38 Ethical considerations

39 This study received ethical approval from the University Research Ethics Approval Committee  
40 for Health [EP 20/21 015]. Participants were provided with an information sheet detailing the  
41 study, allowing them a chance to ask any questions before giving informed consent. They were  
42 informed that they could drop out of the study at any time and without giving a reason, and that  
43 they would be able to remove their data from the study prior to anonymisation. Participants were  
44 made aware that their participation would be confidential and that all responses would be  
45 anonymised. Participants received no financial compensation for taking part.  
46  
47  
48

## 49 50 Results

### 51 52 Sample characteristics

53 15 participants completed the baseline and follow-up questionnaires, and 10 participants  
54 completed the follow up interviews. Participants were mostly white (13/15, 87%), undergraduate  
55 (14/15, 93%) females (14/15, 93%) in their first year of study (10/15, 67%). All participants had  
56  
57  
58  
59

self-harmed in the last 2 months (8/15, 53%) or were having thoughts of self-harm (7/15, 47%). Participants' ages ranged from 18-26 (mean 19.87, SD 2.39). Please see Table 1 for full participant demographics.

Table 1  
*Demographic characteristics of the sample*

| Demographic (N = 15) | n (%)               |          |
|----------------------|---------------------|----------|
| Age                  | 18-20               | 11 (73%) |
|                      | 21-23               | 3 (20%)  |
|                      | 24+                 | 1 (7%)   |
| Gender Identity      | Female              | 14 (93%) |
|                      | Male                | 0 (0%)   |
|                      | Non-binary          | 1 (7%)   |
| Year of Study        | 1                   | 10 (67%) |
|                      | 2                   | 1 (7%)   |
|                      | 3                   | 3 (20%)  |
|                      | 4                   | 1 (7%)   |
| Degree type          | Undergraduate       | 14 (93%) |
|                      | Postgraduate        | 1 (7%)   |
| Ethnicity            | White               | 13 (87%) |
|                      | Asian/Asian British | 1 (7%)   |



|                  |                                            |         |
|------------------|--------------------------------------------|---------|
|                  | Black/African/Caribbean/Black British      | 1 (7%)  |
| Sexuality        | Heterosexual                               | 8 (53%) |
|                  | Bisexual                                   | 5 (33%) |
|                  | Prefer not to say                          | 1 (7%)  |
|                  | Pansexual                                  | 1 (7%)  |
| Self-harm Status | Current self-harm <sup>a</sup>             | 8 (53%) |
|                  | Current thoughts of self-harm <sup>a</sup> | 7 (47%) |

<sup>a</sup> This is defined as being within the past two months

### *Anxiety, depression and coping*

Scores of the GAD-7 suggested that anxiety symptomatology was high within the sample (mean 12.47, SD 4.42), with many participants (12/15, 80%) experiencing at least moderate anxiety. Similarly, all participants were experiencing symptoms of at least mild depression (mean 16.50, SD 5.17), with a third (5/15, 33%) experiencing severe depression. On average, participants in this study seemed mildly confident in their abilities to cope (mean 92.93, SD 33.37), although this is lower than has been found in other samples of students who self-harm (e.g., mean 140.25, SD 48.26 [30]).

### *Self-harm*

Questions regarding the prevalence of self-harm thoughts and behaviour did not specify a timeframe that they had to have occurred within so that those who had not self-harmed within the last two months were still able to provide insight into what their self-harming behaviours were typically like. Within the two weeks prior to joining the study, most participants had thoughts of self-harming rarely or occasionally (9/15, 60%) and had self-harmed never or rarely (12/15, 80%). However, when they occurred, urges to self-harm were typically rated as strong (10/15, 67%). Participants were divided on how difficult they found it to resist harming themselves in the past week, with half saying they had not found it at all difficult or had found it mildly difficult (8/15, 53%), while four participants had found it very hard or had been unable to resist harming themselves (27%).

On average, participants were aged 15 (SD 2.42) when they first self-harmed, although ages ranged from 10-19. Nearly all participants had last self-harmed within the past two years (14/15, 93%), with one participant not having self-harmed since 2011. Around a quarter of participants reported that they usually never tell anybody if /when they self-harm (4/15, 27%), while the most

1  
2  
3 common sources of support sought were university counsellors (9/15, 60%) (this was expected  
4 given that participants were recruited through university wellbeing services) and friend(s) (8/15,  
5 53%). Cutting was the most common method of self-harming among the sample (11/15, 73%),  
6 followed by hitting (6/15, 40%), scratching (5/15, 33%), interfering with wound healing (5/15,  
7 33%) and banging head (4/15, 27%). When self-harming, only one participant (1/15, 7%)  
8 reported never feeling relief afterwards, and relief typically either lasted between 1-30 minutes  
9 (8/15, 53%) or for hours (5/15, 33%). When self-harming, between 1-60 minutes typically  
10 elapsed between thinking about it and acting upon it (11/13, 73%). Techniques most used to  
11 distract themselves from self-harming were talking with someone (9/15, 60%), doing anything to  
12 keep their hands busy (8/15, 53%) and watching TV (8/15, 53%). On a scale of 0 – 4,  
13 participants were moderately motivated to stop self-harming (mean 2.93, SD .80) and felt  
14 moderately able to stop self-harming (mean 2.40, SD 1.12). The most common sources of  
15 treatment the sample had received were self-help (6/15, 40%) or university counselling (5/15,  
16 33%). The function subscale within the Ottawa Self-injury Inventory determined that students  
17 typically self-harmed for internal emotion regulation (mean 12.69, SD 6.36), and were least  
18 likely to self-harm for sensation seeking (mean 1.36, SD 1.95). Only one participant (7%) had  
19 visited a doctor for their self-harm, and two participants (13%) had made a previous suicide  
20 attempt.  
21  
22  
23  
24

## 25 Quantitative Results

### 26 Differences before and after treatment

27  
28 After the trial period, participants scored significantly lower on symptoms of anxiety as assessed  
29 by the GAD7 (mean 10.00, SD 4.16),  $t(14) = 2.26, P = .040, d = .58$ , and on symptoms of  
30 depression assessed by the PHQ 9 (mean 12.47, SD 3.66),  $t(13) = 5.50, P < .001, d = 1.47$ . Scores  
31 on the ABUSI were lower following the trial period (mean 11.07, SD 1.48) compared to before  
32 the trial period (mean 13.13, SD 6.66) although this difference was not statistically significant  
33  $t(14) = 1.49, P = .16, d = .38$ . Similarly, scores on the coping measure were not statistically  
34 significantly higher after the trial period, however, scores for the ‘stop unpleasant thoughts and  
35 emotions’ subscale were significantly higher (i.e. improved) on post-measures (mean 28.60, SD  
36 15.32) than on pre-measures (mean 21.80, SD 10.27),  $t(14) = -2.36, P = .033, d = .61$ . No scores  
37 on any measures were worse following the intervention period, and no adverse events were  
38 reported by wellbeing staff or participants.  
39  
40  
41  
42

### 43 BlueIce Use

44 Over the six weeks, the median use of BlueIce was between six and 12 times (5/15, 33%), with  
45 3/15 (20%) using it a couple of times a week, every day and at least once a day, respectively.  
46 Two participants did not use BlueIce at all (15%), because they forgot to. Of the 13 participants  
47 who used the app, 11 (73%) personalised BlueIce by adding their own ideas to different sections  
48 of the app. Just over a third (5/13, 39%) set reminders to use the app, but everyone used the  
49 mood diary to track their mood. The majority (11/13, 85%) chose to use BlueIce in distressing  
50 moments when they felt like harming themselves, and almost half said that it did stop some  
51 episodes of self-harm (6/11\*, 55%). Over half said that they definitely would continue to use  
52 BlueIce (8/13, 62%) with only one person reporting that they would not (1/13, 8%). On a scale of  
53 0-4, participants rated that they typically found BlueIce easy to use (mean 3.54, SD .52) and  
54 helpful (mean 2.47, SD 1.20), and that they would likely recommend to others (mean 2.73, SD  
55  
56  
57  
58  
59  
60

1  
2  
3 1.16). On the other hand, participants were less sure that they preferred BlueIce to face to face  
4 meetings (mean 1.38, SD 1.30). On a scale of 1-10, participants indicated that they had  
5 experienced small improvements in their self-harm (mean 4.31, SD 2.50) and mental health  
6 (mean 3.46, SD 2.73) since using BlueIce. Out of five, on average participants gave BlueIce 3.46  
7 (SD 1.05) stars.  
8

9  
10 *\*two participants did not answer this question*

## 11 Qualitative results

12 Qualitative interviews were completed with 10 participants.

### 13 Intervention-specific factors

#### 14 **Suitability: Facilitators**

15  
16 Although BlueIce was originally designed for adolescents, most participants felt that it was  
17 appropriate for university students. One participant commented that being designed for a  
18 younger population may have been beneficial as the app was simple to use:  
19

20  
21 *'I didn't think it was [designed for adolescents]. It didn't look that way, although, like, I did like*  
22 *how clean and simple it was. I think it stops it being almost, like, distracting, and I liked how*  
23 *clean it looked' [012]*  
24

25  
26 Two participants (20%) felt that the app would be particularly suitable for students who are more  
27 introverted or isolated and who may struggle to seek professional support:  
28

29  
30 *'Or maybe for a person even who is, like, really, you know, a shy person and not so really*  
31 *outgoing. And, you know, maybe doesn't want to talk to a therapist or something, For those*  
32 *people, maybe, you know, an app would be better option.' [016]*  
33

34  
35 Finally, four participants (40%) discussed how the scope of BlueIce seemed to extend beyond  
36 self-harm, as *'to me it seems like the kind of thing that most people would probably find useful'*  
37 *[008]*. Participants specified that it would also be suitable for students who are struggling more  
38 generally, for example with exam stress, anxiety, or frustration:  
39

40  
41 *'I think this could definitely be used by people who are dissociating or having other issues that*  
42 *aren't self-harm, like feeling really anxious for example, feeling really down, just not knowing*  
43 *what to do or feeling really overwhelmed, I think it could be used for a lot of different things'*  
44 *[006]*  
45

#### 46 **Suitability: Barriers**

47  
48 Conversely, three participants (30%) also discussed how the intervention may not be suitable for  
49 everybody, as people have different experiences of self-harm and different needs from support:  
50

51  
52 *'It seemed like a good app, but not so suited to the way I sort of deal with things... I sort of tried*  
53 *out some of the mood...what is it called? The... the ones where it's like methods of coping? I*  
54  
55  
56  
57  
58  
59  
60

1  
2  
3 *tried out some of those. And, I like, I just didn't find any of them sort of suited to me, like I've still*  
4 *not worked out any particular ways of dealing with it myself. So I think, like, yeah, I think it's*  
5 *good, just not for me.' [008]*  
6

7  
8 This also exemplifies how there tended to be a recognition among participants that, even if  
9 BlueIce may not have been particularly suitable for them, they could see how it could be of value  
10 to others.  
11

### 12 **Usability: Facilitators**

13 Participants typically found the app simple and easy to use. They appreciated it giving them  
14 prompts and guiding them through the app pages, as they noted how moments of distress can be  
15 overwhelming, making it difficult to organise thoughts independently:  
16  
17

18 *'I really like the pages where you can answer questions and, like, the buttons because I hate,*  
19 *like, speaking. Like, in those moments I hate speaking. I hate like... I find it really hard*  
20 *sometimes, I can like, you know, write down my thoughts on, like, that page. But like, a lot of the*  
21 *time I just can't, like, I'm too overwhelmed or, like, I just, yeah, I don't know what I'm thinking,*  
22 *but having the questions or the little buttons like, I love that... because it just helps me so much*  
23 *be able to find what I need...So being given prompts, um, is really, yeah, I really, really like*  
24 *that.'* [010]  
25  
26

27 The simplicity of the app design was highlighted by 7 participants, with references being made to  
28 it not being overwhelming with too many options. The aesthetics of the app were also praised by  
29 five participants (50%), who enjoyed the colour scheme, the icons, the inconspicuous nature of  
30 the app, the format, and the logo.  
31  
32

33 *'Everything looks so happy on the phone. I mean, I like the color. The color is really good. The*  
34 *blue and white....And I think also, yeah, when I was doing it then, when the light is off in the*  
35 *night in bed, it had like this, I don't know, dreamy, calm effect of me, like a cloud or, I don't*  
36 *know, yeah, something like that. It does something to you, just the color and the design.'* [016]  
37  
38

39 Four participants (40%) also felt that the app was private, and appreciated having the passcode so  
40 that nobody but them could access it. This helped users to feel more confident being open with  
41 the app, knowing that their thoughts and feelings would be kept secure.  
42

43 *'I would say the pin password that you set up, that you need to access the app, it was helpful and*  
44 *it create a sense of privacy and especially, I mean less so now because obviously I don't live at*  
45 *home, but there's part of me that likes the idea of, you know, say, if ever anyone was looking*  
46 *over my phone or trying to access my phone knowing that, you know, I wouldn't have to...you*  
47 *know, there'd be preventions, I won't have to feel like I was at risk of someone opening it up and*  
48 *seeing everything.'* [013]  
49  
50

51 Finally, the option to set reminders to use the app was praised by 3 participants (30%), including  
52 one participant who did not use the app frequently, as they acknowledged that it would have  
53 helped them to engage more with the app if they had done so.  
54  
55  
56  
57  
58  
59  
60

### **Usability: Barriers**

While the majority of participants responded positively to the app design and content, one participant did not like the colours and would have preferred pastel colours that would have felt more soothing for them:

*'Just generally thinking about the colour scheme (laughter) maybe more soothing colours, I know it's called BlueIce but maybe the calm of a slightly paler blue... I think a pastel kind of thing would be better' [003]*

The other barriers to usability identified by one participant was that the music section within BlueIce did not link with Spotify, but only Apple Music or music saved on the user's phone, and that they were not able to select more than one photo at a time to upload to the 'good times' section.

### **Acceptability: Facilitators**

Further to BlueIce being perceived as suitable and usable, participants also discussed how it was acceptable and safe to use. Four participants specifically discussed how they do not perceive any risks to BlueIce being widely used, as they *'really didn't see anything on the app that kind of made me feel any negative emotions or anything.'* [016]

One participant elaborated on how they were initially concerned that having an app for self-harm on their phone could be triggering and make them more likely to self-harm, but that they were glad that this was not the case:

*'There was part of me that was a little bit nervous that having the app would make me focus more on self-harm and so therefore maybe, you know, like it would be in the forefront of my head because I'd be seeing the app on my phone everyday... but that didn't happen which was great, I think partly because the app itself is quite innocuous on my phone... it's not glaring at you that it's for self-harm.'* [013]

Participants commented on the specific features within the app that they found helpful, for example the toolbox of mood lifting activities, as having these ideas suggested to them made it easier to find an alternative way of coping in the moment, rather than using self-harm, as the app helped them to remember other things they can do instead:

*I think in the moment you can kind of, like, forget what you can do. I definitely always, like, don't know what to do, which means it [self-harm] becomes the only option, so just, like, being able to see in front of me that, like, there are things I can do to help, it just makes it easier.'* [012]

Another benefit of the toolbox that was highlighted was the option to personalise it by adding the users own ideas to the different sections, as well as making notes of what they tried and whether it worked or not. Three participants (30%) discussed how this helped the app feel more tailored to them and to feel less impersonal.

Importantly, over half of participants (7/10, 70%) specifically mentioned the mood diary as being a positive feature of the app, as it meant that they were able to track how they had been

1  
2  
3 feeling over previous days. Participants commented how this helped them to feel more aware of  
4 their mood and the reasons behind it:  
5

6  
7 *'I like knowing what helps you, like if you need a break, what makes you, like, happy and like,*  
8 *looking back on times when you've been feeling, like, your best. But also knowing and*  
9 *understanding, like, when you're struggling, like, why that might be. I think just writing it down*  
10 *can definitely help' [012]*  
11

12 Further to helping users' to understand their moods and what mediates them, participants also  
13 discussed how the mood diary helped change their perspective, by helping them to acknowledge  
14 their good days as well as their bad:  
15

16  
17 *'I also noticed something when I checked the calendar because, obviously I can see the color*  
18 *codes right, and I felt happy seeing, for example, three or four green ones instead of seeing like,*  
19 *you know, a red and orange and stuff like that. Yeah, I felt like this also had an impact on then*  
20 *how I felt when I saw it. You know, I was like, 'ohh actually I do have good days. My life is not*  
21 *only like, you know, so stressful and bad' because I can see all the green color.'* [016]  
22  
23

24 Further to the mood diary helping users to be aware of their mood and improving their  
25 perspective, three participants (30%) also noted how it provided a useful outlet for them that  
26 offered some relief from their difficult emotions:  
27

28  
29 *'I think it was great for kind of like, when I didn't feel well for just, putting like, you know, notes*  
30 *down about like, my emotions, what I'm feeling...I just noticed that, kind of, when I write things*  
31 *down when I'm not feeling well, I write it out, it's kind of like a little bit of relief as well' [016]*  
32

### 33 **Acceptability: Barriers**

34 Despite the mostly positive perception of the mood diary, one of the barriers to acceptability  
35 discussed by four participants was the mood diary being oversimplified. While some participants  
36 enjoyed the simplicity of the app, others felt that the spectrum of emotions available on the mood  
37 diary did not capture their range of experiences, and that the 'other' option was not sufficient:  
38

39  
40 *'I guess sometimes the mood tracker, just because it only has emotions on one spectrum, so it's*  
41 *either just happy or sad. Even though there was an 'other' option, you could change the words*  
42 *but you couldn't change the colour of the, I dunno what you'd call it, but you can't change the*  
43 *colour of the thing' [001]*  
44

45  
46 Another participant liked the idea of using a mood diary but found that, upon actually using it,  
47 that the reminders to track their mood made them more aware of it when they did not necessarily  
48 want to be:  
49

50  
51 *'I've downloaded, like, other apps in the past to try and do this sort of mood tracker thing. I do*  
52 *quite like the idea of being able to see that, but then, when I actually did it...it, like, would just*  
53 *like, pop up in the middle of the day and it'd be like 'oh how am I feeling?'. And then I'd be like*  
54 *'how am I feeling?... well I'm not feeling terrible...' and I tend to sort of try and ignore that stuff*  
55 *generally when I can.'* [017]  
56  
57  
58  
59  
60

## Person-specific factors

### **Motivation: Facilitators**

Further to the benefits and the impact of the mood diary, eight participants (80%) also discussed more general impacts of the app that maintained their motivation to engage with it. One participant mentioned how the app had had a positive impact on them as they were better able to manage their self-harm:

*'I've definitely been struggling less... just being able to know that I could, like, track it somewhere, like, almost, like, put it in something, um, I thought was quite helpful. Just being able to almost like, confide in the app you know? It definitely stopped [self-harm] being such a regular occurrence' [012]*

Six (60%) specified that they were motivated to engage with the app as they felt that it encouraged positive action that was beneficial for their wellbeing, *'it encourages me to do things that I know will help me, but I just normally can't be assed to do' [010]*. Further to this, participants appreciated being made aware of numerous *'stress relieving techniques, and knowing there's like, more options out there, say like, I didn't want to do meditation one day, then I know I could find another one on there to help' [011]*. In this way, the app proved to be a helpful resource for participants who used it to identify new strategies to help manage their emotions.

One specific way in which the app helped reduce urges to self-harm was in helping participants to regulate their emotions:

*'I found it quite helpful...regulating my mood for the rest of the day, 'cause I found that once I acknowledged it on the app and could see that I'd, you know, acknowledged it and was aware of it, I kind of became less likely to, you know, snap at a family member, and stuff like that... Yeah, yeah 'cause like in the past, a lot of like, triggers for self-harm have been frustration related as opposed to kind of like, sadness related....and I imagine that if I hadn't necessarily had that outlet, I would have then become so frustrated I would have been tempted self-harm' [013]*

Participants were also motivated to continue using the app as it helped to remind them of activities that they found joyful, and helped them to realise that these activities could be beneficial in managing self-harm as well as improving their wellbeing:

*'I'd look at, like, the activity suggested and stuff like that and kind of... it would remind me that those things were things I wouldn't necessarily think to do, and that they would work. So I think like one of them was talking about, like going for walks and stuff, and it's like, I know I like walks and I know they distract me, but I never put two and two together and thought that maybe it would be good in that kind of scenario...The next day I went for a walk and kind of felt like absolutely amazing... But yeah, like, so I think that was again one of the other key things is that it made me kind of stop and take note of things that actually do help and make me associate them with, like, self-harm prevention rather than just them being like activities that I like to do...since getting it in the last six weeks, I've gone on quite a few walks that I may not have necessarily gone on if I hadn't thought like oh, hang on a minute, that's something that I could do and enjoy and that I could actually, like knew could have a positive effect on my mental health' [013]*

1  
2  
3  
4 Finally, continued use of the app was associated with learning strategies that work without  
5 necessarily having to have their phone on them:  
6

7  
8 *'Even if I don't have my phone with me, I now have some of those ideas in my head 'cause once*  
9 *you use them, you know, once you've used the app for a bit, like, you can get - It it can help you*  
10 *just get into a routine of, like, when you start to feel a certain way and know what works, uhm,*  
11 *stuff like the ideas on the app and stuff, what works, what doesn't' [010]*  
12

13 This suggests that the app was beneficial in helping participants to develop and maintain longer  
14 term coping strategies that they could use instead of self-harming.  
15

### 16 **Motivation: Barriers**

17 Despite this, four participants (40%) also discussed the difficulties they faced in being motivated  
18 enough to use the app. Reasons for this included forgetting to use it, low mood hindering their  
19 motivation, being stressed, having low energy, and not believing that anything could help..One  
20 participant emphasised that the lack of external encouragement to engage with the app would  
21 make it harder to be motivated, as *'you have to remember, you have to like, very much like do it*  
22 *for yourself' [017]*  
23  
24

25  
26 Further, three participants (30%) felt that they did not need the app as they did not have urges to  
27 self-harm.  
28

### 29 **Capability: Facilitators**

30 Participants felt that BlueIce being a smartphone app meant that it was particularly suitable for  
31 university students, who are *'kind of stereotypically always attached to their phone' [13]*, so for  
32 whom it would be particularly accessible and convenient. References were also made to BlueIce  
33 being more *'private' [011]* than person-based support, like counseling, for example.  
34  
35

### 36 **Opportunity: Facilitators**

37 Nine participants (90%) perceived BlueIce to be subject to fewer barriers of access as other  
38 services or interventions are, allowing more individuals the opportunity to access support.  
39 Barriers to other services discussed include long waiting lists, difficult referral processes, fees,  
40 lack of personalisation, lack of out of hours support' and support being 'scattered' across  
41 resources.  
42  
43

44  
45 *'But obviously compared to things like therapy and stuff, you have it 24/7. So in that way it it's so*  
46 *much better than therapy because, you know therapy, you know I, I get like twice a week for like*  
47 *an hour each time' [010]*  
48

49 Six participants (60%) discussed how BlueIce could also serve as a useful adjunct for people  
50 who are in receipt of professional support, by allowing them a space to track their thoughts and  
51 feelings between sessions:  
52

53  
54 *'This could be my diary for example and I can note it down. And then because we can forget stuff*  
55 *and I could forget something significant, and then when I have to therapy session we can talk*  
56  
57  
58  
59



1  
2  
3 *about everything and my feelings on that day, and I think it would support the counseling*  
4 *session.’ [016]*  
5

6  
7 Finally, one participant praised the opportunity to still be able to receive support without  
8 requiring any interaction:  
9

10 *‘I think it might be quite helpful because, I know that there are times for me at least where if I’m*  
11 *not feeling great I don’t like talking to people, but also, like, I don’t exactly want to neglect my*  
12 *health either, so having that option to not have to talk to anyone but still sort of helping yourself*  
13 *in a way is really nice.’ [001]*  
14  
15

### 16 **Opportunity: Barrier**

17 Conversely, four participants (40%) also discussed how they do not perceive BlueIce as a  
18 replacement for professional support, as there are further opportunities for support that the app  
19 does not provide. Three participants (30%) noted how the lack of human interaction is a  
20 downside as they valued input from a mental health professional. One participant explained how  
21 this is important to them as they need firm direction in therapy in order to improve their  
22 wellbeing:  
23

24  
25 *‘What I have with my counselor now you know, sometimes he would say something and I’ll be*  
26 *like... especially with me, with my personality and you know, not being able maybe to take help*  
27 *from other people, or not knowing what’s best for myself, and then someone else telling me what*  
28 *to do... I’d already told him as well, ‘you need to be a bit harsh with me’. I don’t want anyone*  
29 *soft.’ [016]*  
30  
31

32 One participant commented on how they perceived the function of BlueIce to be more relative to  
33 in the moment distractions, whereas therapy is important for *‘getting to the route of the problem,*  
34 *and I think that to get to the route of a problem it needs to be face to face, it needs to be*  
35 *individualised, and you wouldn’t want a computer or something to go through that with you cos*  
36 *then it can get it wrong and that can have consequences and things’ [003]*  
37  
38

## 39 **Discussion**

40  
41 This exploratory study is the first to evaluate the acceptability and safety of a smartphone app  
42 (BlueIce) for university students who self-harm. Overall, the app was found to be acceptable and  
43 safe, as well helpful for participants to manage their self-harm and promote behaviour beneficial  
44 to wellbeing. Safety was determined quantitatively, with no scores on wellbeing measures  
45 deteriorating over the period, and qualitatively, with participants reporting that BlueIce was safe  
46 to use and presented no risks to students. Similarly, no adverse events were reported by  
47 participants or wellbeing staff. However, some limitations of the app were also noted, such as the  
48 motivation required to engage with it.  
49  
50

### 51 **Comparison with prior work**

52 Levels of anxiety and depression symptomatology within the sample were higher than have been  
53 found in clinical samples with similar age groups. For example, Bentley et al [40] found mean  
54 GAD-7 and PHQ-9 scores of 8.5 and 10.6 respectively, compared to 12.5 and 16.5 in the current  
55  
56  
57  
58  
59  
60

1  
2  
3 sample. Interestingly, surveys of university students have found scores that are comparable to  
4 those found in non-student clinical populations; Akram et al [41] reported a mean GAD-7 score  
5 of 9.3 and a PHQ-9 score of 10.1 based on a sample of 1,273 students. This endorses findings  
6 that university students are at a significantly heightened risk of struggling with mental health  
7 difficulties [2, 42]. In the baseline measures all participants classed themselves as either having  
8 self-harmed within the past 2 months or as currently having thoughts of self-harm. Despite this,  
9 in the two weeks prior, very few had self-harmed or had thoughts of self-harming. This raises  
10 interesting questions regarding how individuals who self-harm perceive their self-harm status.  
11 Claréus et al [43] investigated this and identified that individuals typically perceive themselves  
12 as having stopped self-harming if they had done so few times within the past month or year.  
13 However, some participants still did identify as someone who self-harms despite not having self-  
14 harmed within the past year. Importantly, it was found that how individuals perceive their  
15 recovery is more important than the time that has elapsed since the last act of self-harm. This  
16 corroborates the importance of asking participants to self-identify their self-harm status, rather  
17 than presuming they no longer self-harm in accordance with a certain time frame.  
18  
19  
20

21  
22 The current sample scored lower on measures of coping self-efficacy at baseline than in other  
23 studies of university students who self-harm [35]. It is important to acknowledge the context in  
24 which this research occurred, as the trial period was within a national lockdown due to the  
25 COVID-19 pandemic, in which everyone was encouraged to stay at home to stop the spread of  
26 the virus. Contact with anyone outside of the household was restricted. Consequently, many  
27 institutions closed, including universities, and most interaction had to occur in online spaces  
28 instead. This meant that university students were no longer attending in-person lectures, and the  
29 participants in this study were no longer attending in-person counseling sessions. This context  
30 may explain participants' lower coping self-efficacy, as students may have had less access to  
31 resources that positively impacted their abilities to cope, such as social networks [44]. A survey  
32 of 576 students did indeed find that the pandemic negatively impacted students' mood and  
33 wellness [45], suggesting they may have been particularly vulnerable during this time.  
34  
35

36  
37 Despite this sample comprising students who had all disclosed self-harm to a mental health  
38 professional, a quarter of participants in this study indicated that they usually do not tell anybody  
39 when they self-harm. This suggests that, even for this group who have disclosed self-harm to a  
40 mental health professional and volunteered for a research study regarding a self-harm  
41 intervention, discussing self-harm can still be challenging. Importantly, this sample seemed to  
42 struggle more with self-harm urges than self-harm behaviours, with 12 participants indicating  
43 that they had self-harmed either rarely or never within the past two weeks, but with two thirds  
44 indicating that their urges to self-harm were strong. This reinforces the importance of measuring  
45 self-harm urges as well as behaviours, as they can be predictive of future self-harm and can still  
46 be very distressing for the individual [46, 47]. Moreover, a questionnaire completed by 1,296  
47 students found that self-harm thoughts alone are still able to allow the individual relief from  
48 difficult emotions [48].  
49  
50

51  
52 Generally, there was a high level of engagement with the app with several participants using it  
53 frequently, adding personalised content to the app, tracking their mood, and using BlueIce in  
54 moments of distress. High levels of engagement with BlueIce have also been found in previous  
55 studies with adolescents [49]. Despite the app originally being designed with and for adolescents,  
56  
57  
58  
59  
60

1  
2  
3 this did not seem to deter university students from engaging with it and finding it beneficial.  
4 Participants in this study typically praised the simplicity of the app and enjoyed the design,  
5 although some found the mood diary too simple to capture their experiences; this split in opinion  
6 replicates findings from the previous evaluation of the acceptability of BlueIce with university  
7 students [21]. Nonetheless, those who did benefit from the mood diary discussed how it helped  
8 them to manage their emotions by providing an outlet for them through which they could get  
9 some relief from their difficult feelings, as well as being able to identify triggers for different  
10 moods. This mirrors findings from another study with young adults who self-harm, who found  
11 mood tracking via a smartphone app beneficial in managing emotions and identifying triggers  
12 [50]. Participants in the current study also found it helpful being able to reflect on their mood in  
13 difficult moments, as well as more broadly in order to gain perspective and feel more optimistic  
14 by realising that they do have good days as well as bad. These qualitative findings resonate with  
15 the quantitative findings showing an increase in participants perceived self-efficacy in being able  
16 to stop unpleasant thoughts or emotions following the trial period, rated using the coping self-  
17 efficacy scale [34]. It may be that the techniques participants learnt to manage their emotions,  
18 promote positive wellbeing and to cope in alternative ways as opposed to self-harm, as discussed  
19 above, may have contributed to their heightened beliefs in their abilities to stop difficult thoughts  
20 and emotions.  
21  
22  
23  
24

25 Around half of the participants indicated that BlueIce had stopped them from harming  
26 themselves at certain points. While this is important, previous research with university students  
27 with lived experience of self-harm highlighted that relying on a reduction in self-harm  
28 behaviours is not necessarily the best way to measure the success of an intervention [51],  
29 preferring a more holistic and wider perspective that also considers their general wellbeing [52].  
30 In particular, university students who self-harm have emphasised wanting self-harm  
31 interventions to help them to learn more adaptive coping strategies and to address their broader  
32 mental health difficulties that are ‘triggers’ for their self-harm [13]. 80% of participants in the  
33 interviews discussed some positive impact of the app, including helping them to develop longer  
34 term, alternative coping strategies, and encouraging action that was beneficial for their  
35 wellbeing. As mentioned, participants’ perceived abilities to stop unpleasant thoughts and  
36 emotions also improved. Further, participants in this study believed that BlueIce could help  
37 students struggling with a range of mental health difficulties, as well as typical university  
38 stressors such as exams. Overall, this would suggest that BlueIce typically aligned with  
39 university students’ favoured outcomes of interventions. However, one participant did specify  
40 that professional support is necessary for getting to the route of the issue behind their self-harm.  
41 This reinforces the heterogeneity surrounding preferences for support that has been found  
42 previously [13, 53, 54], emphasising the need to ensure university students are able to access a  
43 variety of resources and sources of support.  
44  
45  
46  
47

48 The function that BlueIce could provide was explored, with participants suggesting it could be a  
49 helpful adjunct to counseling that allowed users to log how they had been feeling in between  
50 sessions to relay back to their counselor. Participants also discussed finding it helpful in  
51 moments of distress by reminding them of techniques to manage their emotions or distract  
52 themselves, without the user having to search for techniques themselves. The longer-term impact  
53 was also discussed, with participants commenting on having a better understanding of their  
54 triggers and how to manage their emotions, without even having the app in front of them. This  
55  
56  
57  
58  
59  
60

1  
2  
3 confirms the perception identified in a previous study investigating the acceptability of BlueIce  
4 with university students, where it was identified as a useful reminder of adaptive coping  
5 strategies in difficult moments, as well as a means of learning ways of processing emotions [21].  
6 This also reflects findings with adolescents, who reported that BlueIce helped them to reframe  
7 difficult thoughts and provided a helpful distraction [20]. This suggests that BlueIce could be a  
8 useful tool that is scalable, able to offer 'out of hours' support, can help students cope in difficult  
9 moments, and reach more students who may be struggling with self-harm and feel unable to  
10 directly ask for help. Research into self-harm interventions in university settings is very limited,  
11 for example Nawaz et al [55] found only two studies meeting this criteria, neither of which were  
12 found to be effective in reducing self-harm. More research is needed to establish the  
13 effectiveness of BlueIce, nevertheless, the current study identifies it as a valuable and acceptable  
14 tool for students.  
15  
16  
17

### 18 Limitations

19 Firstly, participants in this study all used the app alongside counseling provided by the university  
20 wellbeing services. As such, it is not possible to directly attribute the improvements in  
21 participants' wellbeing to either the counseling or the app. Similarly, participants were recruited  
22 from one university wellbeing service who had already sought help for their self-harm. These  
23 findings may not be representative of students attending other universities or those who self-  
24 harm but have not sought help. Similarly, the sample were demographically homogenous so  
25 these results may not generalise to students from other genders or ethnicities for example. As  
26 BlueIce was found to be safe to use, future research should seek to assess the impact of  
27 implementing BlueIce more widely with students in the general university population.  
28  
29  
30

31 Secondly, this was an exploratory open study with a small number of participants and as such  
32 data is limited and must be interpreted with caution. Challenges to recruitment were experienced  
33 including problems accessing students during the university summer break and the COVID-19  
34 pandemic when students were not physically present on campus. In addition, to maximise  
35 student safety, we recruited participants through the University wellbeing services but this meant  
36 that we had no direct access to possible participants. Steps were taken to try and mitigate these  
37 challenges, such as drafting email templates and eligibility checklists to reduce staff burden, but  
38 recruitment remained limited. Consequently, future research would benefit from a larger scale  
39 study to determine the effectiveness of BlueIce in this population.  
40  
41  
42

43 Finally, this research occurred during a period of national lockdown due to the COVID-19  
44 pandemic. This could have affected our results which may be lacking temporal validity.  
45

### 46 Conclusion

47 In summary, BlueIce proved to be a safe, acceptable and helpful tool for university students  
48 attending face-to-face mental health services. Following use, participants reported that they had  
49 developed more adaptive coping mechanisms, were better able to identify triggers for self-harm,  
50 and had fewer symptoms of depression and anxiety. This mirrors previous research into the use  
51 of BlueIce among university students, adding further credence to its benefits for this population.  
52  
53

54 Further research is indicated using robust methodologies and appropriately powered cohorts to  
55 investigate these findings further.  
56  
57  
58  
59  
60

## Acknowledgements

The authors would like to thank the participants for their contribution to this research.

## Competing interests

Paul Stallard designed the BlueIce app but receives no financial gain from the app or from this research. The other authors declare that they have no conflicts of interest.

## Contributorship statement

All authors contributed to the draft of this manuscript. Bethany Cliffe completed data collection. Bethany Cliffe, Emma Moore and Kathryn Whittle completed qualitative data analysis. Bethany Cliffe completed quantitative data analysis. Paul Stallard provided supervision.

## Funding

This research was funded by the University of Bath.

## Data sharing

Consent was not received from participants to make data publicly available.

## References

1. NICE. Self-Harm [Internet]. 2013 Jun. (Quality Standard). Available from: <https://www.nice.org.uk/guidance/qs34/resources/selfharm-2098606243525>
2. Swannell SV, Martin GE, Page A, et al. Prevalence of Nonsuicidal Self-Injury in Nonclinical Samples: Systematic Review, Meta-Analysis and Meta-Regression. *Suicide Life Threat Behav* 2014;44:273–303. <https://doi.org/10.1111/sltb.12070>
3. Taliaferro LA, Muehlenkamp JJ. Risk Factors Associated With Self-injurious Behavior Among a National Sample of Undergraduate College Students. *J Am Coll Health* 2015;63:40–8. <https://doi.org/10.1080/07448481.2014.953166>
4. Griffin K, Twynstra J, Gilliland JA, et al. Correlates of self-harm in university students: A cross-sectional study. *J Am Coll Health* 2021;0:1–8. <https://doi.org/10.1080/07448481.2021.1909049>
5. Chandler A. Narrating the self-injured body. *Med Humanit* 2014;40:111–6. <https://doi.org/10.1136/medhum-2013-010488>
6. Long M. ‘We’re not monsters ... we’re just really sad sometimes:’ hidden self-injury, stigma and help-seeking. *Health Sociol Rev* 2018;27:89–103.
7. Sheehy K, Noureen A, Khaliq A, et al. An examination of the relationship between shame, guilt and self-harm: A systematic review and meta-analysis. *Clin Psychol Rev* 2019;73(101779). <https://doi.org/10.1016/j.cpr.2019.101779>
8. Simone AC, Hamza CA. Examining the disclosure of nonsuicidal self-injury to informal and formal sources: A review of the literature. *Clin Psychol Rev* 2020;82(101907). <https://doi.org/10.1016/j.cpr.2020.101907>

- 1  
2  
3  
4  
5  
6  
7  
8  
9  
10  
11  
12  
13  
14  
15  
16  
17  
18  
19  
20  
21  
22  
23  
24  
25  
26  
27  
28  
29  
30  
31  
32  
33  
34  
35  
36  
37  
38  
39  
40  
41  
42  
43  
44  
45  
46  
47  
48  
49  
50  
51  
52  
53  
54  
55  
56  
57  
58  
59  
60
9. Simone AC, Hamza CA. A longitudinal examination of predictors of nonsuicidal self-injury disclosures among university students. *J Clin Psychol* 2021;1(18). <https://doi.org/10.1002/jclp.23277>
  10. Staniland L, Hasking P, Boyes M, et al. Stigma and nonsuicidal self-injury: Application of a conceptual framework. *Stigma Health* 2021;6:312–23. <https://doi.org/10.1037/sah0000257>
  11. Fitzgerald J, Curtis C. Non-suicidal self-injury in a New Zealand student population: Demographic and self-harm characteristics. *N Z J Psychol* 2017;46:156–63.
  12. Whitlock J, Eckenrode J, Silverman D. Self-injurious Behaviors in a College Population. *Pediatrics* 2006;117:1939–48. <https://doi.org/10.1542/peds.2005-2543> PMID: 16740834
  13. Cliffe B, Stallard P. University students' experiences and perceptions of interventions for self-harm. *J Youth Stud* 2022;0:1–15. <https://doi.org/10.1080/13676261.2022.2033187>
  14. Topooco N, Fowler LA, Fitzsimmons-Craft EE, et al. Digital interventions to address mental health needs in colleges: Perspectives of student stakeholders. *Internet Interventions*. 2022;28:100528. <https://doi.org/10.1016/j.invent.2022.100528>
  15. Lattie EG, Adkins EC, Winkler N, et al. Digital Mental Health Interventions for Depression, Anxiety, and Enhancement of Psychological Well-Being Among College Students: Systematic Review. *J Med Internet Res* 2019 Jul;21(7). <https://www.jmir.org/2019/7/e12869> <https://doi.org/10.2196/12869>
  16. Ponzio S, Morelli D, Kawadler JM, et al. Efficacy of the Digital Therapeutic Mobile App BioBase to Reduce Stress and Improve Mental Well-Being Among University Students: Randomized Controlled Trial. *JMIR mHealth and uHealth* 2020 Apr;8:e17767. <https://doi.org/10.2196/17767>
  17. 1. Cliffe B, Tingley J, Greenhalgh I, Stallard P. [mHealth Interventions for Self-Harm: Scoping Review. Journal of Medical Internet Research. 2021 Apr 30;23\(4\):e25140.](https://doi.org/10.2196/17767)
  18. Barnett P, Arundell LL, Saunders R, et al. The efficacy of psychological interventions for the prevention and treatment of mental health disorders in university students: A systematic review and meta-analysis. *Journal of Affective Disorders*. 2021;280:381–406. <https://doi.org/10.1016/j.jad.2020.10.060>
  19. Stallard P, Porter J, Grist R. A Smartphone App (BlueIce) for Young People Who Self-Harm: Open Phase 1 Pre-Post Trial. *JMIR MHealth UHealth* 2018;6:e32. <https://doi.org/10.2196/mhealth.8917>
  20. Grist R, Porter J, Stallard P. Acceptability, Use, and Safety of a Mobile Phone App (BlueIce) for Young People Who Self-Harm: Qualitative Study of Service Users' Experience. *JMIR Ment Health* 2018 Feb;5(1). <https://www.ncbi.nlm.nih.gov/pmc/articles/PMC5845106/> <https://doi.org/10.2196/mental.8779>
  21. Cliffe B, Stokes Z, Stallard P. The Acceptability of a Smartphone App (BlueIce) for University Students Who Self-harm. *Arch Suicide Res*. 2022;0:1–17. <https://doi.org/10.1080/13811118.2021.2022552>
  22. Kaufman J, Birmaher B, Brent D, Rao U, Flynn C, Moreci P, et al. Schedule for Affective Disorders and Schizophrenia for School-Age Children-Present and Lifetime Version (K-SADS-PL): Initial Reliability and Validity Data. *Journal of the American Academy of Child & Adolescent Psychiatry*. 1997 Jul 1;36(7):980–8.
  23. Malterud K, Siersma VD, Guassora AD. Sample Size in Qualitative Interview Studies: Guided by Information Power. *Qual Health Res*. 2016 Nov 1;26(13):1753–60.

- 1  
2  
3 24. Stallard P, Porter J, Grist R. Safety, Acceptability, and Use of a Smartphone App,  
4 BlueIce, for Young People Who Self-Harm: Protocol for an Open Phase I Trial. *JMIR Res*  
5 *Protoc* 2016;5:e217. <https://doi.org/10.2196/resprot.6525>  
6  
7 25. Craig P, Dieppe P, Macintyre S, et al. Developing and evaluating complex interventions:  
8 the new Medical Research Council guidance. *BMJ* 2008 Sep;337.  
9 <https://www.bmj.com/content/337/bmj.a1655> <https://doi.org/10.1136/bmj.a1655>  
10  
11 26. Washburn JJ, Juzwin KR, Styer DM, et al. Measuring the urge to self-injure: Preliminary  
12 data from a clinical sample. *Psychiatry Res* 2010;178:540–4.  
13 <https://doi.org/10.1016/j.psychres.2010.05.018>  
14  
15 27. Cloutier PF, Nixon MK. The Ottawa Self-Injury Inventory: A preliminary evaluation.  
16 Abstracts to the 12th International Congress European Society for Child and Adolescent  
17 Psychiatry. *European Child & Adolescent Psychiatry*. 2003;  
18  
19 28. Martin J, Bureau JF, Cloutier P, Lafontaine MF. A Comparison of Invalidating Family  
20 Environment Characteristics Between University Students Engaging in Self-Injurious Thoughts  
21 & Actions and Non-Self-Injuring University Students. *J Youth Adolescence*. 2011 Nov  
22 1;40(11):1477–88.  
23  
24 29. Spitzer RL, Kroenke K, Williams JBW, et al. A Brief Measure for Assessing Generalized  
25 Anxiety Disorder: The GAD-7. *Arch Intern Med*. 2006;166:1092.  
26 <https://doi.org/10.1001/archinte.166.10.1092>  
27  
28 30. Bártolo A, Monteiro S, Pereira A. Factor structure and construct validity of the  
29 Generalized Anxiety Disorder 7-item (GAD-7) among Portuguese college students. *Cad Saúde*  
30 *Pública* 2017;33:e00212716. <https://doi.org/10.1590/0102-311x00212716>  
31  
32 31. Farrer LM, Gulliver A, Bennett K, et al. Demographic and psychosocial predictors of  
33 major depression and generalised anxiety disorder in Australian university students. *BMC*  
34 *Psychiatry* 2016;16:241. <https://doi.org/10.1186/s12888-016-0961-z>  
35  
36 32. Musiat P, Goldstone P, Tarrrier N. Understanding the acceptability of e-mental health -  
37 attitudes and expectations towards computerised self-help treatments for mental health problems.  
38 *BMC Psychiatry* 2014;14:109. <https://doi.org/10.1186/1471-244X-14-109>  
39  
40 33. Kroenke K, Spitzer RL, Williams JBW. The PHQ-9. *J Gen Intern Med*. 2001;16:606–13.  
41 <https://doi.org/10.1046/j.1525-1497.2001.016009606.x>  
42  
43 34. Chesney MA, Neilands TB, Chambers DB, et al. A validity and reliability study of the  
44 coping self-efficacy scale. *Br J Health Psychol* 2006;11:421–37.  
45 <https://doi.org/10.1348/135910705X53155>  
46  
47 35. Midkiff MF, Lindsey CR, Meadows EA, et al. The role of coping self-efficacy in emotion  
48 regulation and frequency of NSSI in young adult college students. *Cogent Psychol*.  
49 2018;5:1520437. <https://doi.org/10.1080/23311908.2018.1520437>  
50  
51 36. Elo S, Kyngäs H. The qualitative content analysis process. *Journal of Advanced Nursing*.  
52 2008;62(1):107–15.  
53  
54 37. O'Connor C, Joffe H. Intercoder Reliability in Qualitative Research: Debates and  
55 Practical Guidelines. *Int J Qual Methods* 2020;19:1609406919899220.  
56 <https://doi.org/10.1177/1609406919899220>  
57  
58 38. Gliem JA, Gliem RR. Calculating, Interpreting, And Reporting Cronbach's Alpha Reliability  
59 Coefficient For Likert-Type Scales. 2003 [cited 2023 Jul 7]; Available from:  
60 <https://scholarworks.iupui.edu/handle/1805/344>

- 1  
2  
3 39. Liverpool S, Mota CP, Sales CMD, et al. Engaging Children and Young People in Digital  
4 Mental Health Interventions: Systematic Review of Modes of Delivery, Facilitators, and  
5 Barriers. *J Med Internet Res* 2020;22:e16317. <https://doi.org/10.2196/16317>  
6  
7 40. Bentley KH, Sakurai H, Lowman KL, Rines-Toth L, McKowen J, Pedrelli P, et al.  
8 Validation of brief screening measures for depression and anxiety in young people with  
9 substance use disorders. *Journal of Affective Disorders*. 2021 Mar 1;282:1021–9.  
10  
11 41. Akram U, Ypsilanti A, Gardani M, Irvine K, Allen S, Akram A, et al. Prevalence and  
12 psychiatric correlates of suicidal ideation in UK university students. *Journal of Affective*  
13 *Disorders*. 2020 Jul 1;272:191–7.  
14  
15 42. Stallman HM. Psychological distress in university students: A comparison with general  
16 population data. *Australian Psychologist* 2010;45:249–57.  
17 <https://doi.org/10.1080/00050067.2010.482109>  
18  
19 43. Claréus B, Hasking PA, Gray N, et al. Is ceasing self-injury enough? Differences in  
20 psychological health between people reporting behavioral cessation of non-suicidal self-injury  
21 and those who consider themselves to have stopped self-injuring. *J Clin Psychol*  
22 2022;jclp.23409. <https://doi.org/10.1002/jclp.23409>  
23  
24 44. Sahu P. Closure of Universities Due to Coronavirus Disease 2019 (COVID-19): Impact on  
25 Education and Mental Health of Students and Academic Staff. *Cureus* 2020 Apr;12(4).  
26 [https://www.cureus.com/articles/30110-closure-of-universities-due-to-coronavirus-disease-2019-](https://www.cureus.com/articles/30110-closure-of-universities-due-to-coronavirus-disease-2019-covid-19-impact-on-education-and-mental-health-of-students-and-academic-staff)  
27 <https://doi.org/10.7759/cureus.7541>  
28  
29 45. Copeland WE, McGinnis E, Bai Y, et al. Impact of COVID-19 Pandemic on College Student  
30 Mental Health and Wellness. *Journal of the American Academy of Child & Adolescent*  
31 *Psychiatry*. 2021;60:134-141.e2. <https://doi.org/10.1016/j.jaac.2020.08.466>  
32  
33 46. Burke TA, Ammerman BA, Hamilton JL, et al. Nonsuicidal self-injury scar concealment  
34 from the self and others. *Journal of Psychiatric Research*. 2020;130:313–20.  
35 <https://doi.org/10.1016/j.jpsychires.2020.07.040>  
36  
37 47. Miller M, Redley M, Wilkinson PO. A Qualitative Study of Understanding Reasons for Self-  
38 Harm in Adolescent Girls. *International Journal of Environmental Research and Public Health*  
39 2021;18:3361. <https://doi.org/10.3390/ijerph18073361>  
40  
41 48. Martin J, Bureau JF, Cloutier P, et al. A Comparison of Invalidating Family Environment  
42 Characteristics Between University Students Engaging in Self-Injurious Thoughts & Actions and  
43 Non-Self-Injuring University Students. *J Youth Adolescence* 2011;40:1477–88.  
44 <https://doi.org/10.1007/s10964-011-9643-9>  
45  
46 49. Muscara F, Ng O, Crossley L, Lu S, et al. The feasibility of using smartphone apps to  
47 manage self-harm and suicidal acts in adolescents admitted to an inpatient mental health ward.  
48 *Digit Health* 2020 Nov;6. <https://www.ncbi.nlm.nih.gov/pmc/articles/PMC7705813/>  
49 <https://doi.org/10.1177/2055207620975315>  
50  
51 50. Honary M, Bell B, Clinch S, et al. Shaping the Design of Smartphone-Based Interventions  
52 for Self-Harm. *Proceedings of the 2020 CHI Conference on Human Factors in Computing*  
53 *Systems* Honolulu HI USA: ACM; 2020:1–14. <https://dl.acm.org/doi/10.1145/3313831.3376370>  
54  
55 51. Owens C, Fox F, Redwood S, et al. Measuring outcomes in trials of interventions for people  
56 who self-harm: qualitative study of service users' views. *BJPsych Open* 2020 Mar;6(2).  
57 [https://www.cambridge.org/core/journals/bjpsych-open/article/measuring-outcomes-in-trials-of-](https://www.cambridge.org/core/journals/bjpsych-open/article/measuring-outcomes-in-trials-of-interventions-for-people-who-selfharm-qualitative-study-of-service-users-views/00B4C4A51CB7627AEBE960FAB87DCB04)  
58 <https://doi.org/10.1192/bjo.2019.93>  
59  
60



- 1  
2  
3 52. Knowles S, Sharma V, Fortune S, et al. Adapting a codesign process with young people to  
4 prioritize outcomes for a systematic review of interventions to prevent self-harm and suicide.  
5 *Health Expectations* 2022. <https://onlinelibrary.wiley.com/doi/abs/10.1111/hex.13479>  
6 <https://doi.org/10.1111/hex.13479>  
7  
8 53. Carroll R, Metcalfe C, Gunnell D. Hospital Presenting Self-Harm and Risk of Fatal and Non-  
9 Fatal Repetition: Systematic Review and Meta-Analysis. *PLoS One* 2014 Feb;9(2).  
10 <https://www.ncbi.nlm.nih.gov/pmc/articles/PMC3938547/>  
11 <https://doi.org/10.1371/journal.pone.0089944>  
12  
13 54. Hume M, Platt S. Appropriate interventions for the prevention and management of self-harm:  
14 a qualitative exploration of service-users' views. *BMC Public Health* 2007;7:9.  
15 <https://doi.org/10.1186/1471-2458-7-9>  
16  
17 55. Nawaz RF, Anderson JK, Colville L, Fraser-Andrews C, Ford TJ. Review: Interventions to  
18 prevent or manage self-harm among students in educational settings – a systematic review. *Child*  
19 *and Adolescent Mental Health* [Internet]. [cited 2023 Mar 3];n/a(n/a). Available from:  
20 <https://onlinelibrary.wiley.com/doi/abs/10.1111/camh.12634>  
21  
22  
23  
24  
25  
26  
27  
28  
29  
30  
31  
32  
33  
34  
35  
36  
37  
38  
39  
40  
41  
42  
43  
44  
45  
46  
47  
48  
49  
50  
51  
52  
53  
54  
55  
56  
57  
58  
59  
60



1  
2  
3  
4  
5  
6  
7  
8  
9  
10  
11  
12  
13  
14  
15  
16  
17  
18  
19  
20  
21  
22  
23  
24  
25  
26  
27  
28  
29  
30  
31  
32  
33  
34  
35  
36  
37  
38  
39  
40  
41  
42  
43  
44  
45  
46  
47  
48  
49  
50  
51  
52  
53  
54  
55  
56  
57  
58  
59  
60

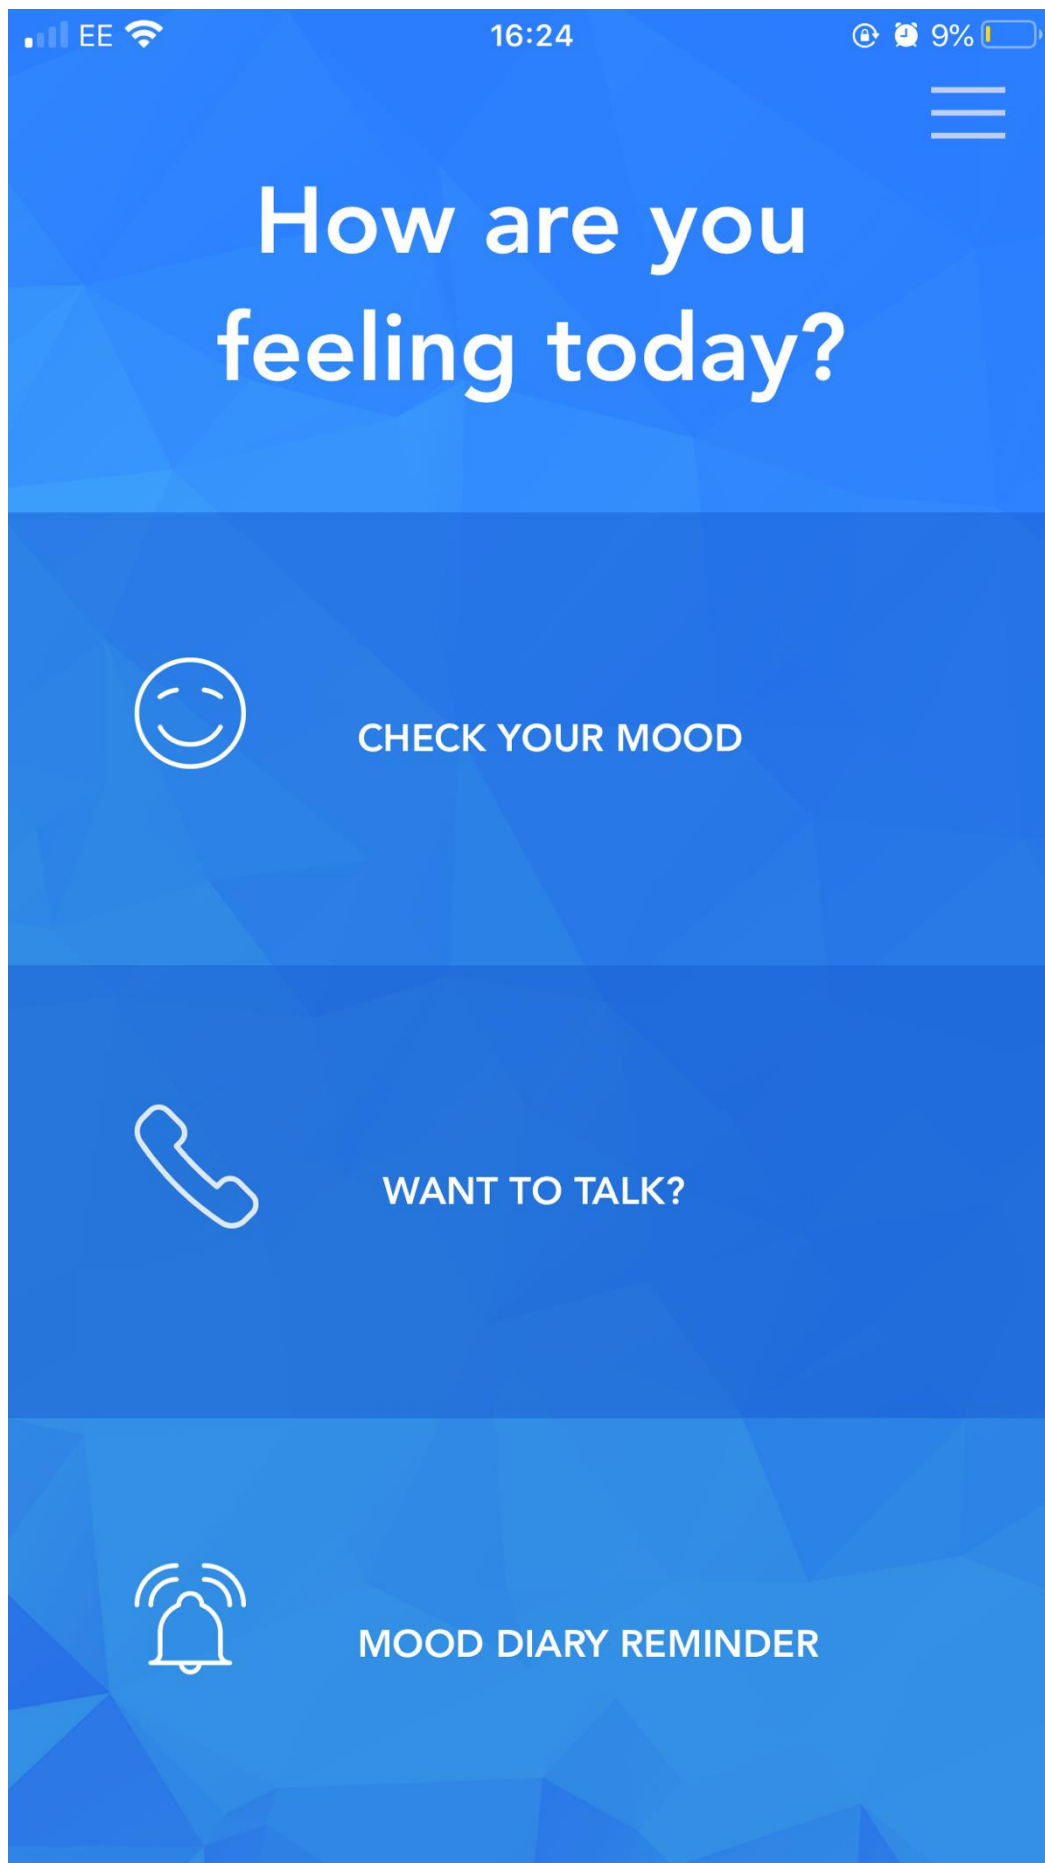



1  
2  
3  
4  
5  
6  
7  
8  
9  
10  
11  
12  
13  
14  
15  
16  
17  
18  
19  
20  
21  
22  
23  
24  
25  
26  
27  
28  
29  
30  
31  
32  
33  
34  
35  
36  
37  
38  
39  
40  
41  
42  
43  
44  
45  
46  
47  
48  
49  
50  
51  
52  
53  
54  
55  
56  
57  
58  
59  
60



1  
2  
3  
4  
5  
6  
7  
8  
9  
10  
11  
12  
13  
14  
15  
16  
17  
18  
19  
20  
21  
22  
23  
24  
25  
26  
27  
28  
29  
30  
31  
32  
33  
34  
35  
36  
37  
38  
39  
40  
41  
42  
43  
44  
45  
46  
47  
48  
49  
50  
51  
52  
53  
54  
55  
56  
57  
58  
59  
60

The screenshot shows a mobile application interface for a mood diary. At the top, the status bar displays 'EE' network, signal strength, Wi-Fi, time '16:12', and 10% battery. The app title is 'MOOD DIARY'. Below it is a calendar for 'September 2020'. The calendar grid shows days of the week (S, M, T, W, T, F, S) and dates. Three dates are highlighted with red boxes: 17 (Thursday), 26 (Saturday), and 29 (Tuesday). Below the calendar, a mood selection area shows a 'Really Sad' mood selected, represented by a sad face icon in a red circle. To the right of the mood selection are a plus sign and a checkmark icon. Below the mood selection, the time '15:48' and '1 note' are displayed. The note content is 'Had an argument with my partner'.

1  
2  
3  
4  
5  
6  
7  
8  
9  
10  
11  
12  
13  
14  
15  
16  
17  
18  
19  
20  
21  
22  
23  
24  
25  
26  
27  
28  
29  
30  
31  
32  
33  
34  
35  
36  
37  
38  
39  
40  
41  
42  
43  
44  
45  
46  
47  
48  
49  
50  
51  
52  
53  
54  
55  
56  
57  
58  
59  
60







1  
2  
3  
4  
5  
6  
7  
8  
9  
10  
11  
12  
13  
14  
15  
16  
17  
18  
19  
20  
21  
22  
23  
24  
25  
26  
27  
28  
29  
30  
31  
32  
33  
34  
35  
36  
37  
38  
39  
40  
41  
42  
43  
44  
45  
46  
47  
48  
49  
50  
51  
52  
53  
54  
55  
56  
57  
58  
59  
60





1  
2  
3  
4  
5  
6  
7  
8  
9  
10  
11  
12  
13  
14  
15  
16  
17  
18  
19  
20  
21  
22  
23  
24  
25  
26  
27  
28  
29  
30  
31  
32  
33  
34  
35  
36  
37  
38  
39  
40  
41  
42  
43  
44  
45  
46  
47  
48  
49  
50  
51  
52  
53  
54  
55  
56  
57  
58  
59  
60



Record what you did

1  
2  
3  
4  
5  
6  
7  
8  
9  
10  
11  
12  
13  
14  
15  
16  
17  
18  
19  
20  
21  
22  
23  
24  
25  
26  
27  
28  
29  
30  
31  
32  
33  
34  
35  
36  
37  
38  
39  
40  
41  
42  
43  
44  
45  
46  
47  
48  
49  
50  
51  
52  
53  
54  
55  
56  
57  
58  
59  
60

The screenshot shows a mobile application interface for an 'Admin Diary'. At the top, there is a status bar with signal strength, 'EE' carrier, Wi-Fi, time '16:25', and 9% battery. Below the status bar is a blue header with a share icon, the text 'VIEW HISTORY', and a hamburger menu icon. The main content area has a blue background with a calendar icon and the text 'Admin Diary'. A dark grey bar highlights the date '19/03/2020' with a downward arrow. Below this, the text 'Get active:' is followed by 'Activities: Walk a mile' and 'Notes: No notes recorded.'. Another dark grey bar highlights '17/09/2020' with a downward arrow. Below this, 'Get active:' is followed by 'Activities: Walk a mile' and 'Notes: No notes recorded.'. A third dark grey bar highlights '13/10/2020' with a downward arrow. Below this, 'Do something:' is followed by 'Activities: Watch TV' and 'Notes: I watched a film and it helped take my mind off things'. The bottom of the screen is a large, empty light grey rectangular area.

VIEW HISTORY

Admin Diary

19/03/2020

**Get active:**  
Activities: Walk a mile  
Notes: No notes recorded.

17/09/2020

**Get active:**  
Activities: Walk a mile  
Notes: No notes recorded.

**Do something:**  
Activities: Watch TV  
Notes: No notes recorded.

13/10/2020

**Do something:**  
Activities: Watch TV  
Notes: I watched a film and it helped take my mind off things

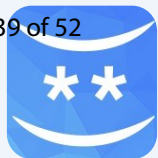

# Blueelce User Guide

## Login

Set your log in PIN number to a number you will remember. You will be asked for your PIN each time you log on.

If you forget your PIN it can be reset by pressing the reset button. Unfortunately you will lose any notes or items you have saved.

## How are you feeling today?

This is the home page where you can check your mood, talk to helplines or friends, or set your mood diary reminder. You can return to the Home page by tapping the top  and selecting home.

## Mood checker

This is the mood wheel – tap the mood that best describes how you are feeling. You can  add a note to explain why you are feeling like this.

## Mood diary

This is a record of the moods you have entered. You will see a calendar and if you select a day you can see all the moods and notes you entered for that day.

## Mood lifter

This is a toolbox of ideas to help you manage your emotions.

## Add notes

Wherever you see ‘record what you did’ or ‘type your notes here’ tap the screen and a box will appear for you to add your notes. Your saved notes will appear in view history.

## Add items

Wherever you see this button you can add your own items. You can do this in most of the mood lifter sections and in the Mood Diary.

## Delete items

You can delete any items that you have added .  
Apple/iOS: swipe left, tap delete

Android: Hold your finger on the item for two seconds. A box will appear and you can click edit, delete or cancel.

## View history

Tap on the menu button and click view history. Here you can view your notes and all the things you entered that you tried to do on each day.

## Privacy

All data you enter is stored on your phone. It is not transmitted or saved anywhere else unless you chose to download or send a copy

## Download your entries

Tap the top right icon on this page to send a copy of the entries you have made to an email address.

## Information

When you see this button you can tap it to find out more information. .

## Set up mood diary reminder

On the Home screen you can set two reminders to record your mood each day. Set the time and click OK.

You can delete reminders by:

Apple/iOS: tap to open timer and select delete.

Android: hold your finger on the reminder time for 2/3 seconds and select the option to delete.

## Exiting Blueelce

Open the top left menu  and select logout.

## Feedback

To send feedback to the Blueelce team open the top left menu  and tap the feedback button.

This will create an email to the Blueelce team..

 **Blueelce is designed to be used alongside face to face work with a mental health worker.**

If Blueelce isn't helping you then discuss this with your mental health worker.

**The effectiveness and acceptability of a smartphone app (BlueIce) for university students experiencing self-harm thoughts/behaviours.**

**Experience of using BlueIce Questionnaire**

1. Roughly how many times did you use BlueIce over the past 6 weeks?

Once or twice

Up to 5 times

6-12 times (up to once per week)

Couple of times per week

More often (please specify)

2. Did you personalise (i.e. add your own ideas to) the following sections of the mood lifter?

Get Active (physical activities)

Do something (get busy)

Good times (photos)

Listen and relax (music)

Thinking traps (download your head)

Contact friends (add 2/3 friends)

Ride it out (soothing toolbox)

3. What sections of BlueIce did you use the most?

4. Did you set reminders to complete the mood diary?

Yes

No

5. Did you use the mood checker section to record your mood?

Yes

1  
2  
3  
4  No

5  
6  
7 **If NO** – were there any reasons why?

8  
9  
10 \_\_\_\_\_

11  
12 **If YES** – how often did you use it and was it helpful?

13  
14  
15 \_\_\_\_\_

16 6. Did you use BlueIce when you were distressed and felt like harming yourself?

17  
18  Yes

19  
20  
21  No

22  
23  
24  
25 **If No** – Were there any reasons why you didn't use BlueIce (e.g. didn't need to, forgot,  
26 didn't think it would help). **Got to Question 9**

27  
28  
29 **If Yes** – Over the past 12 weeks how many times did you use BlueIce when you were  
30 thinking of harming yourself?

31  
32  
33  Once or twice

34  
35  Up to 5 times

36  
37  
38  6-12 times (up to once per week)

39  
40  Couple of times per week

41  
42  
43  More often (please specify)

44  
45 7. Did BlueIce ever stop you from harming yourself?

46  
47  
48  Yes

49  
50  
51  No

52  
53  
54 **If no**, why do you think it didn't stop you from harming yourself?

55  
56 **If Yes**, how many times did it stop you from harming yourself?

57  Once or twice

58  
59  Up to 5 times

1  
2  
3  
4  
5  
6  
7  
8  
9  
10  
11  
12  
13  
14  
15  
16  
17  
18  
19  
20  
21  
22  
23  
24  
25  
26  
27  
28  
29  
30  
31  
32  
33  
34  
35  
36  
37  
38  
39  
40  
41  
42  
43  
44  
45  
46  
47  
48  
49  
50  
51  
52  
53  
54  
55  
56  
57  
58  
59  
60

6-12 times (up to once per week)

Couple of times per week

More often (please specify)

8. Which sections of BlueIce helped you most when you were thinking of harming yourself?

9. Were there times when you self-harmed that you didn't use BlueIce

Yes

No

**If Yes**

- What stopped you from using BlueIce (no phone, forgot, feelings too intense)?

10. Were there any parts of BlueIce you found unhelpful, didn't like or didn't use?

11. Please read the statement below and indicate the extent to which you agree or disagree.

|                                             | Strongly Agree | Agree | Not sure | Disagree | Strongly Disagree |
|---------------------------------------------|----------------|-------|----------|----------|-------------------|
| BlueIce was easy to use                     |                |       |          |          |                   |
| BlueIce was helpful                         |                |       |          |          |                   |
| I prefer BlueIce to face to face meetings   |                |       |          |          |                   |
| I would recommend BlueIce to other students |                |       |          |          |                   |

12. Choose a number between 1-10 to show how much your self-harm has improved after using BlueIce?

|   |   |   |   |   |   |   |   |   |    |
|---|---|---|---|---|---|---|---|---|----|
| 1 | 2 | 3 | 4 | 5 | 6 | 7 | 8 | 9 | 10 |
|---|---|---|---|---|---|---|---|---|----|



No improvement

Much improvement

13. Choose a number between 1-10 to show how much your mental health has improved after using BlueIce?

|   |   |   |   |   |   |   |   |   |    |
|---|---|---|---|---|---|---|---|---|----|
| 1 | 2 | 3 | 4 | 5 | 6 | 7 | 8 | 9 | 10 |
|---|---|---|---|---|---|---|---|---|----|

No improvement

Much improvement

14. How many stars would you give BlueIce?

- \*
- \*\*
- \*\*\*
- \*\*\*\*
- \*\*\*\*\*

15. Is life different for you now after using BlueIce and, if so, how is it different?

16. Will you continue to use BlueIce?

- Yes
- No
- Not sure

## Experience of BlueIce Interview

1. What did you think about using BlueIce?

*Example prompt questions:*

- What did you think about the mood diary?
- What did you think about the different techniques suggested?
- Did you like the way it looked / was laid out?
- Was it easy/hard to use?
- Did you personalise BlueIce at all?
- How does using BlueIce compare to other types of support for self-harm?

2. Do you think BlueIce has helped you to manage your self-harm / improve your wellbeing?

*Example prompt questions:*

- What techniques did you try that helped/didn't help?
- What impact did BlueIce have on your self-harm/mood?
- What bits specifically do you think helped / didn't help?
- Do you think using BlueIce helped you learn or practice alternative coping strategies?

3. Why do you think BlueIce helped / didn't help you manage your self-harm and wellbeing?

*Example prompt questions:*

- How does it compare to other types of support you've had?
- Were there any barriers to using BlueIce?
- Do you think it's just BlueIce that isn't helpful for you, or smartphone apps in general?

4. Do you think BlueIce could be helpful for other university students?

*Example prompt questions:*

- Do you think students would use BlueIce?
- What would the disadvantages and advantages be for other students using BlueIce?
- Do you think if a student was struggling to ask for formal support, they may benefit from using BlueIce?

5. Is there anything else you would like to say about BlueIce or about this study, that hasn't yet been covered in the questionnaires or in this interview?

| Umbrella code            | Definition                                                                                                                                                                                                                                                                                                                                                                                        | Examples                                                                                                                                                                                                                                                                                                                                                                                                              |
|--------------------------|---------------------------------------------------------------------------------------------------------------------------------------------------------------------------------------------------------------------------------------------------------------------------------------------------------------------------------------------------------------------------------------------------|-----------------------------------------------------------------------------------------------------------------------------------------------------------------------------------------------------------------------------------------------------------------------------------------------------------------------------------------------------------------------------------------------------------------------|
| User friendly (or not)   | This code encapsulates the general design of BlueIce (i.e. the logo, the colours) as well as being user friendly (i.e. simple, not overwhelming, easy to use). Can also include more general design features e.g. passcode & privacy etc.                                                                                                                                                         | 'Everything looks so happy on the phone. I mean, I like the color. The color is really good. The blue and white'                                                                                                                                                                                                                                                                                                      |
| Engagement               | Participants discussing their engagement (or lack of) with BlueIce, or motivation being a barrier to engage with it / the activities within it. Can also include references to not having the time to use it, or forgetting to use it because they need to be motivated to take those steps to engage. Different to heterogeneity because that's more acknowledging differences.                  | 'for the things with the activity ones, I don't know, umm... for me, it's hard to engage in stuff like that.'<br><br>'I was just lacking the motivation, especially when I'm feeling low '                                                                                                                                                                                                                            |
| Further support required | References to the app lacking an element of interaction, whether it be generally with another human or with a clinician specifically. Can also include general references to BlueIce not being enough and needing more support. Can also include references to it not being 'enough', i.e. it is missing components e.g. psychoeducation or further explanations, not taking enough into account. | 'I think I would need someone there with me and be like, OK, do this and that now really taking me, yeah, through all the steps'                                                                                                                                                                                                                                                                                      |
| Adjunct to therapy       | Participants mentioning that BlueIce could work well alongside / in conjunction with therapy, or it being a useful first step to help get students to seek therapy/ realise they need therapy etc. NOT saying it wouldn't work without therapy and that it has to be alongside therapy.                                                                                                           | 'if it's if the therapist then says like, you know, homework wise or something, I'll always like have a diary. This could be my diary for example and I can note it down. And then because we can forget stuff and I could forget something significant, and then when I have to therapy session we can talk about everything and my feelings on that day and I think it would support yeah the counselling session.' |
| Positive impact          | Positive comments about the mood diary helping students to track their mood, or alter their perspective on how they've been feeling. Also references to the app providing                                                                                                                                                                                                                         | 'I write things down when I'm not feeling well, I write it out, it's kind of like a little bit of relief as well'                                                                                                                                                                                                                                                                                                     |

|                                 |                                                                                                                                                                                                                                                                                                                                                                                                                                                                                                                                   |                                                                                                                                                                                                                                                             |
|---------------------------------|-----------------------------------------------------------------------------------------------------------------------------------------------------------------------------------------------------------------------------------------------------------------------------------------------------------------------------------------------------------------------------------------------------------------------------------------------------------------------------------------------------------------------------------|-------------------------------------------------------------------------------------------------------------------------------------------------------------------------------------------------------------------------------------------------------------|
|                                 | them an outlet / providing relief from negative emotions/emotion regulation, allowing them to vent etc. Also talking about awareness of current mood.                                                                                                                                                                                                                                                                                                                                                                             |                                                                                                                                                                                                                                                             |
| Unhelpful                       | Negative comments about the mood diary / app relating to the red days being unhelpful, not needing to track their mood, or the moods not capturing their emotional ranges.                                                                                                                                                                                                                                                                                                                                                        |                                                                                                                                                                                                                                                             |
| Safe                            | Participants saying that BlueIce is safe to use, it not having risks associated with it or it being helpful for students generally.                                                                                                                                                                                                                                                                                                                                                                                               | 'Ohh no, no risks, no cause it's still like free to use the app whenever and I really didn't see anything on the app that kind of made me feel any negative emotions or anything.'                                                                          |
| Heterogeneity                   | Any references to the individual experience of self-harm or of interventions, including comments about 'personally...' or 'others may be different...', acknowledging the importance of not providing a one size fits all approach.                                                                                                                                                                                                                                                                                               | 'what works for me might not work for another person'<br><br>'I know that some people that would give it a chance, and I think it would be very, you know, helpful for them.'                                                                               |
| Target populations              | Participants saying that BlueIce could be helpful for specific groups of people, i.e., based on their self-harm (e.g. low level or 'new' to SH), mental health status (e.g. people with specific diagnoses like ADHD or dissociation) or demographics (e.g. age, students).                                                                                                                                                                                                                                                       | 'Or maybe for a person even who is like really, you know, a shy person and not so really outgoing. And, you know, maybe doesn't want to talk to therapist or something for those people, maybe, you know, an app would be better option.'                   |
| Barriers to other interventions | Discussion of barriers to other services <b>but</b> only if this relates to BlueIce somehow, e.g., it would help to overcome these barriers like not having a waiting list or something. Include other digital interventions in this as well (helplines, websites, face to face). Accessible also relates to the ease of access of BlueIce both in the first instance (i.e. not having to join a wait list etc) and also in the moment (i.e. out and about). Includes references to it being on a phone which is easily accessed. | 'also for the university, I know there's a long list waiting list for people to get therapy and stuff'<br><br>'because obviously it's an app and we are all just you know on our phones at the moment, phone is like, what would life be without the phone' |

1  
2  
3  
4  
5  
6  
7  
8  
9  
10  
11  
12  
13  
14  
15  
16  
17  
18  
19  
20  
21  
22  
23  
24  
25  
26  
27  
28  
29  
30  
31  
32  
33  
34  
35  
36  
37  
38  
39  
40  
41  
42  
43  
44  
45  
46

|         |                                                                                                                                                                                                                                                                                                          |                                                                                               |
|---------|----------------------------------------------------------------------------------------------------------------------------------------------------------------------------------------------------------------------------------------------------------------------------------------------------------|-----------------------------------------------------------------------------------------------|
| Toolbox | References to it being a helpful toolbox (e.g. everything in one place). Also comments on the extent of personalisation available of the toolbox, i.e. whether it's enough or not enough. Negative comments specifically about the suggestions in the mood lifter (e.g. going to the cinema or whatever) | 'it's not really personalized as well you know like obviously it's just like a general thing' |
|---------|----------------------------------------------------------------------------------------------------------------------------------------------------------------------------------------------------------------------------------------------------------------------------------------------------------|-----------------------------------------------------------------------------------------------|

For peer review only

| Categories                           | Codes | Barrier                  | Facilitator               |
|--------------------------------------|-------|--------------------------|---------------------------|
| <i>Intervention Specific factors</i> |       |                          |                           |
| <b>Suitability</b>                   |       | Heterogeneity            | Target populations        |
| <b>Usability</b>                     |       | Not user friendly        | User friendly             |
| <b>Acceptability</b>                 |       |                          | Safe                      |
|                                      |       | Unhelpful                |                           |
|                                      |       | Toolbox                  | Personalisation options   |
| <i>Person Specific Factors</i>       |       |                          |                           |
| <b>Motivation</b>                    |       | Engagement barriers      |                           |
|                                      |       |                          | Positive impact           |
| <b>Capability</b>                    |       | Motivation               |                           |
| <b>Opportunity</b>                   |       | Further support required |                           |
|                                      |       |                          | Barriers to other support |
|                                      |       |                          | Adjunct to therapy        |

Table 2

CONSORT checklist of information to include when reporting a pilot trial

| Section/topic and item No  | Standard checklist item                                                                                                 | Extension for pilot trials                                                                                                                          | Page No where item is reported |
|----------------------------|-------------------------------------------------------------------------------------------------------------------------|-----------------------------------------------------------------------------------------------------------------------------------------------------|--------------------------------|
| Title and abstract         |                                                                                                                         |                                                                                                                                                     |                                |
| 1a                         | Identification as a randomised trial in the title                                                                       | Identification as a pilot or feasibility randomised trial in the title                                                                              | 1                              |
| 1b                         | Structured summary of trial design, methods, results, and conclusions (for specific guidance see CONSORT for abstracts) | Structured summary of pilot trial design, methods, results, and conclusions (for specific guidance see CONSORT abstract extension for pilot trials) | 2                              |
| Introduction               |                                                                                                                         |                                                                                                                                                     |                                |
| Background and objectives: |                                                                                                                         |                                                                                                                                                     |                                |
| 2a                         | Scientific background and explanation of rationale                                                                      | Scientific background and explanation of rationale for future definitive trial, and reasons for randomised pilot trial                              | 4                              |
| 2b                         | Specific objectives or hypotheses                                                                                       | Specific objectives or research questions for pilot trial                                                                                           | 4                              |
| Methods                    |                                                                                                                         |                                                                                                                                                     |                                |
| Trial design:              |                                                                                                                         |                                                                                                                                                     |                                |
| 3a                         | Description of trial design (such as parallel, factorial) including allocation ratio                                    | Description of pilot trial design (such as parallel, factorial) including allocation ratio                                                          | 4                              |
| 3b                         | Important changes to methods after trial commencement (such as eligibility criteria), with reasons                      | Important changes to methods after pilot trial commencement (such as eligibility criteria), with reasons                                            | N/A                            |
| Participants:              |                                                                                                                         |                                                                                                                                                     |                                |
| 4a                         | Eligibility criteria for participants                                                                                   |                                                                                                                                                     | 5                              |
| 4b                         | Settings and locations where the data were collected                                                                    |                                                                                                                                                     | 5                              |
| 4c                         |                                                                                                                         | How participants were identified and consented                                                                                                      | 5                              |

| Section/topic and item No         | Standard checklist item                                                                                                               | Extension for pilot trials                                                                                                                                   | Page No where item is reported |
|-----------------------------------|---------------------------------------------------------------------------------------------------------------------------------------|--------------------------------------------------------------------------------------------------------------------------------------------------------------|--------------------------------|
| Interventions:                    |                                                                                                                                       |                                                                                                                                                              |                                |
| 5                                 | The interventions for each group with sufficient details to allow replication, including how and when they were actually administered |                                                                                                                                                              | 6                              |
| Outcomes:                         |                                                                                                                                       |                                                                                                                                                              |                                |
| 6a                                | Completely defined prespecified primary and secondary outcome measures, including how and when they were assessed                     | Completely defined prespecified assessments or measurements to address each pilot trial objective specified in 2b, including how and when they were assessed | 6,7                            |
| 6b                                | Any changes to trial outcomes after the trial commenced, with reasons                                                                 | Any changes to pilot trial assessments or measurements after the pilot trial commenced, with reasons                                                         | N/A                            |
| 6c                                |                                                                                                                                       | If applicable, prespecified criteria used to judge whether, or how, to proceed with future definitive trial                                                  | N/A                            |
| Sample size:                      |                                                                                                                                       |                                                                                                                                                              |                                |
| 7a                                | How sample size was determined                                                                                                        | Rationale for numbers in the pilot trial                                                                                                                     | 5,6                            |
| 7b                                | When applicable, explanation of any interim analyses and stopping guidelines                                                          |                                                                                                                                                              | N/A                            |
| Randomisation:                    |                                                                                                                                       |                                                                                                                                                              |                                |
| Sequence generation:              |                                                                                                                                       |                                                                                                                                                              |                                |
| 8a                                | Method used to generate the random allocation sequence                                                                                |                                                                                                                                                              | N/A                            |
| 8b                                | Type of randomisation; details of any restriction (such as blocking and block size)                                                   | Type of randomisation(s); details of any restriction (such as blocking and block size)                                                                       | N/A                            |
| Allocation concealment mechanism: |                                                                                                                                       |                                                                                                                                                              |                                |
| 9                                 | Mechanism used to implement the random allocation sequence (such as                                                                   |                                                                                                                                                              | N/A                            |



| Section/topic and item No                             | Standard checklist item                                                                                                                        | Extension for pilot trials                                                                                                                                                            | Page No where item is reported |
|-------------------------------------------------------|------------------------------------------------------------------------------------------------------------------------------------------------|---------------------------------------------------------------------------------------------------------------------------------------------------------------------------------------|--------------------------------|
|                                                       | sequentially numbered containers), describing any steps taken to conceal the sequence until interventions were assigned                        |                                                                                                                                                                                       |                                |
| Implementation:                                       |                                                                                                                                                |                                                                                                                                                                                       |                                |
| 10                                                    | Who generated the random allocation sequence, enrolled participants, and assigned participants to interventions                                |                                                                                                                                                                                       | N/A                            |
| Blinding:                                             |                                                                                                                                                |                                                                                                                                                                                       |                                |
| 11a                                                   | If done, who was blinded after assignment to interventions (eg, participants, care providers, those assessing outcomes) and how                |                                                                                                                                                                                       | N/A                            |
| 11b                                                   | If relevant, description of the similarity of interventions                                                                                    |                                                                                                                                                                                       |                                |
| Analytical methods:                                   |                                                                                                                                                |                                                                                                                                                                                       |                                |
| 12a                                                   | Statistical methods used to compare groups for primary and secondary outcomes                                                                  | Methods used to address each pilot trial objective whether qualitative or quantitative                                                                                                | 7,8                            |
| 12b                                                   | Methods for additional analyses, such as subgroup analyses and adjusted analyses                                                               | Not applicable                                                                                                                                                                        | N/A                            |
| Results                                               |                                                                                                                                                |                                                                                                                                                                                       |                                |
| Participant flow (a diagram is strongly recommended): |                                                                                                                                                |                                                                                                                                                                                       |                                |
| 13a                                                   | For each group, the numbers of participants who were randomly assigned, received intended treatment, and were analysed for the primary outcome | For each group, the numbers of participants who were approached and/or assessed for eligibility, randomly assigned, received intended treatment, and were assessed for each objective | 6                              |
| 13b                                                   | For each group, losses and exclusions after randomisation, together with reasons                                                               |                                                                                                                                                                                       | N/A                            |

| Section/topic and item No | Standard checklist item                                                                                                                           | Extension for pilot trials                                                                                                                                                     | Page No where item is reported |
|---------------------------|---------------------------------------------------------------------------------------------------------------------------------------------------|--------------------------------------------------------------------------------------------------------------------------------------------------------------------------------|--------------------------------|
| Recruitment:              |                                                                                                                                                   |                                                                                                                                                                                |                                |
| 14a                       | Dates defining the periods of recruitment and follow-up                                                                                           |                                                                                                                                                                                | 6                              |
| 14b                       | Why the trial ended or was stopped                                                                                                                | Why the pilot trial ended or was stopped                                                                                                                                       | N/A                            |
| Baseline data:            |                                                                                                                                                   |                                                                                                                                                                                |                                |
| 15                        | A table showing baseline demographic and clinical characteristics for each group                                                                  |                                                                                                                                                                                | 9, 10                          |
| Numbers analysed:         |                                                                                                                                                   |                                                                                                                                                                                |                                |
| 16                        | For each group, number of participants (denominator) included in each analysis and whether the analysis was by original assigned groups           | For each objective, number of participants (denominator) included in each analysis. If relevant, these numbers should be by randomised group                                   | 10,11                          |
| Outcomes and estimation:  |                                                                                                                                                   |                                                                                                                                                                                |                                |
| 17a                       | For each primary and secondary outcome, results for each group, and the estimated effect size and its precision (such as 95% confidence interval) | For each objective, results including expressions of uncertainty (such as 95% confidence interval) for any estimates. If relevant, these results should be by randomised group | 10,11                          |
| 17b                       | For binary outcomes, presentation of both absolute and relative effect sizes is recommended                                                       | Not applicable                                                                                                                                                                 | N/A                            |
| Ancillary analyses:       |                                                                                                                                                   |                                                                                                                                                                                |                                |
| 18                        | Results of any other analyses performed, including subgroup analyses and adjusted analyses, distinguishing prespecified from exploratory          | Results of any other analyses performed that could be used to inform the future definitive trial                                                                               | N/A                            |
| Harms:                    |                                                                                                                                                   |                                                                                                                                                                                |                                |
| 19                        | All important harms or unintended effects in each group (for specific guidance see CONSORT for harms)                                             |                                                                                                                                                                                | N/A                            |
| 19a                       |                                                                                                                                                   | If relevant, other important unintended consequences                                                                                                                           | N/A                            |

| Section/topic and item No | Standard checklist item                                                                                          | Extension for pilot trials                                                                                                                          | Page No where item is reported |
|---------------------------|------------------------------------------------------------------------------------------------------------------|-----------------------------------------------------------------------------------------------------------------------------------------------------|--------------------------------|
| Discussion                |                                                                                                                  |                                                                                                                                                     |                                |
| Limitations:              |                                                                                                                  |                                                                                                                                                     |                                |
| 20                        | Trial limitations, addressing sources of potential bias, imprecision, and, if relevant, multiplicity of analyses | Pilot trial limitations, addressing sources of potential bias and remaining uncertainty about feasibility                                           | 21                             |
| Generalisability:         |                                                                                                                  |                                                                                                                                                     |                                |
| 21                        | Generalisability (external validity, applicability) of the trial findings                                        | Generalisability (applicability) of pilot trial methods and findings to future definitive trial and other studies                                   | 21                             |
| Interpretation:           |                                                                                                                  |                                                                                                                                                     |                                |
| 22                        | Interpretation consistent with results, balancing benefits and harms, and considering other relevant evidence    | Interpretation consistent with pilot trial objectives and findings, balancing potential benefits and harms, and considering other relevant evidence | 18,19                          |
| 22a                       |                                                                                                                  | Implications for progression from pilot to future definitive trial, including any proposed amendments                                               | 21                             |
| Other information         |                                                                                                                  |                                                                                                                                                     |                                |
| Registration:             |                                                                                                                  |                                                                                                                                                     |                                |
| 23                        | Registration number and name of trial registry                                                                   | Registration number for pilot trial and name of trial registry                                                                                      | N/A                            |
| Protocol:                 |                                                                                                                  |                                                                                                                                                     |                                |
| 24                        | Where the full trial protocol can be accessed, if available                                                      | Where the pilot trial protocol can be accessed, if available                                                                                        | N/A                            |
| Funding:                  |                                                                                                                  |                                                                                                                                                     |                                |
| 25                        | Sources of funding and other support (such as supply of drugs), role of funders                                  |                                                                                                                                                     | N/A                            |
| 26                        |                                                                                                                  | Ethical approval or approval by research review committee, confirmed with reference number                                                          | 8                              |
