# Supplementary material for: Is a smartphone application (BlueIce) acceptable and safe for university students who self-harm: an open study
Source: PubMed Central journal article supplement — BMJ Open. 2024 Apr 24;14(4):e069862. doi: 10.1136/bmjopen-2022-069862 (PMC11043752; doi:10.1136/bmjopen-2022-069862), 2024-04-24
Supplement: bmjopen-2022-069862supp001.pdf [file bmjopen-2022-069862supp001.pdf]

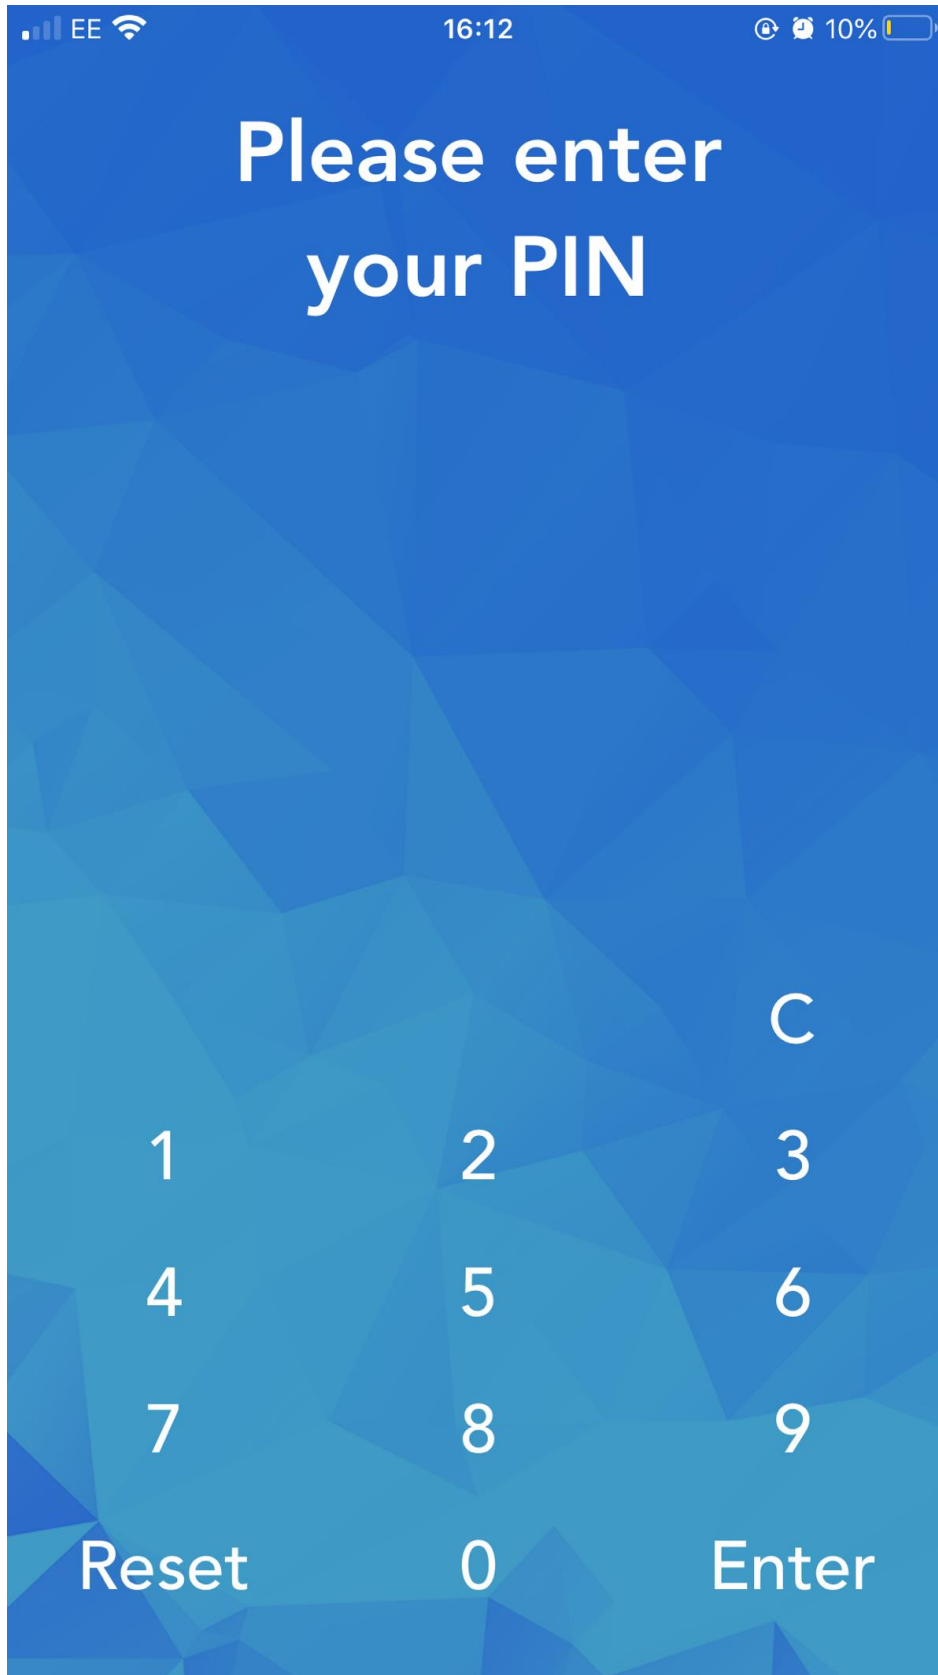

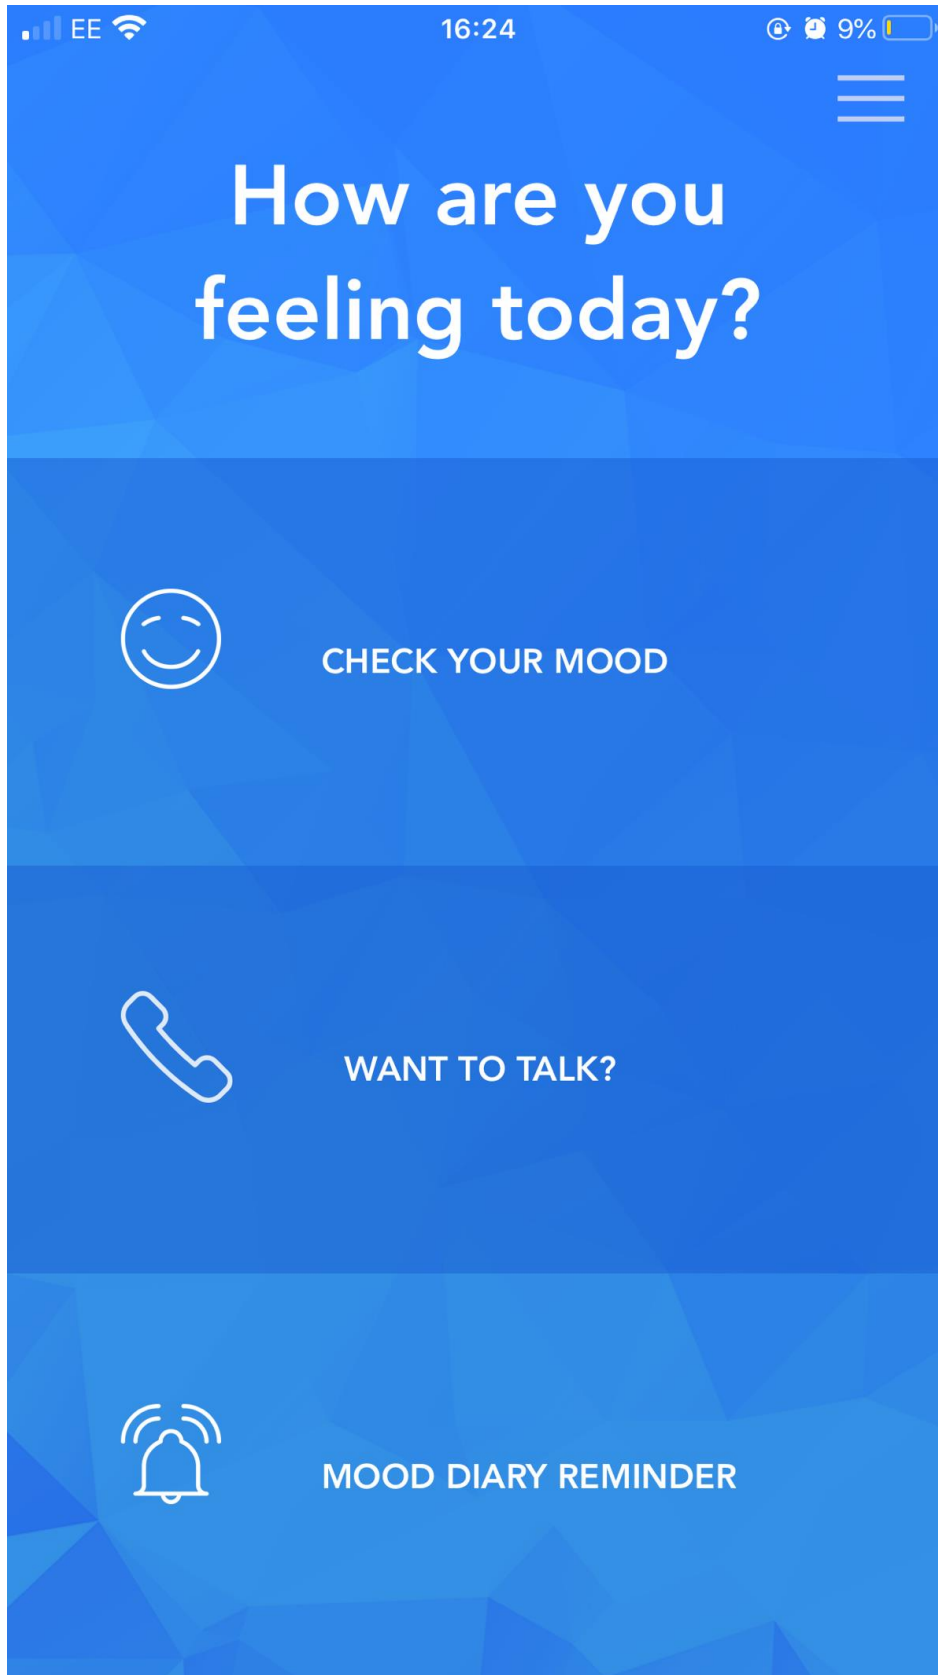

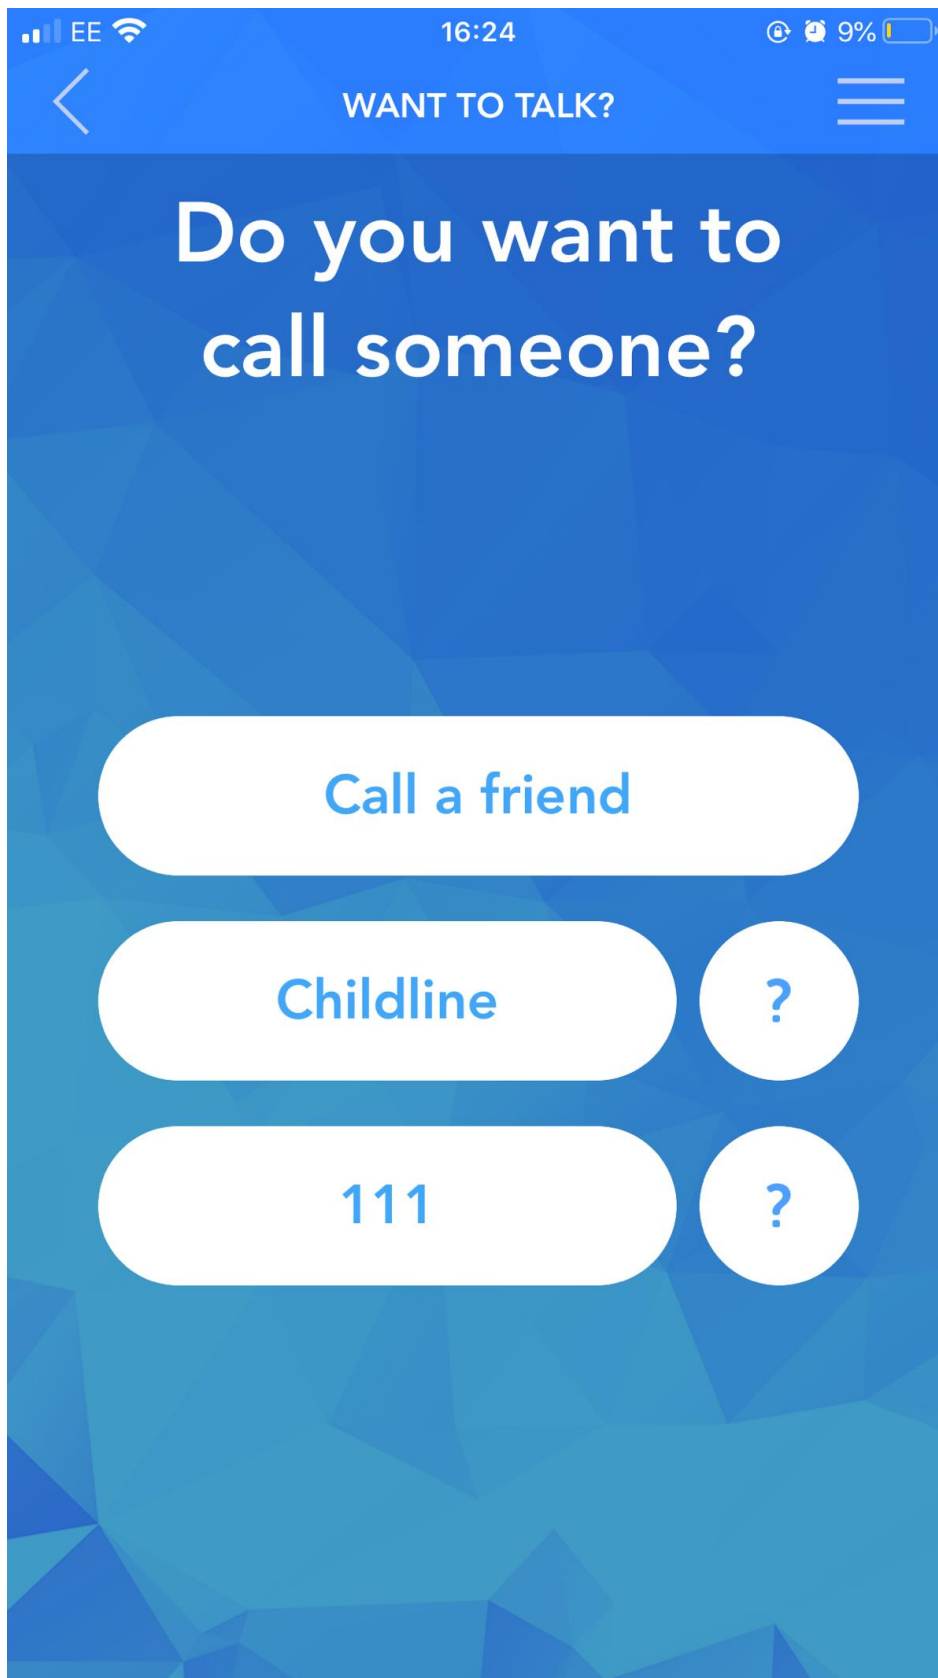

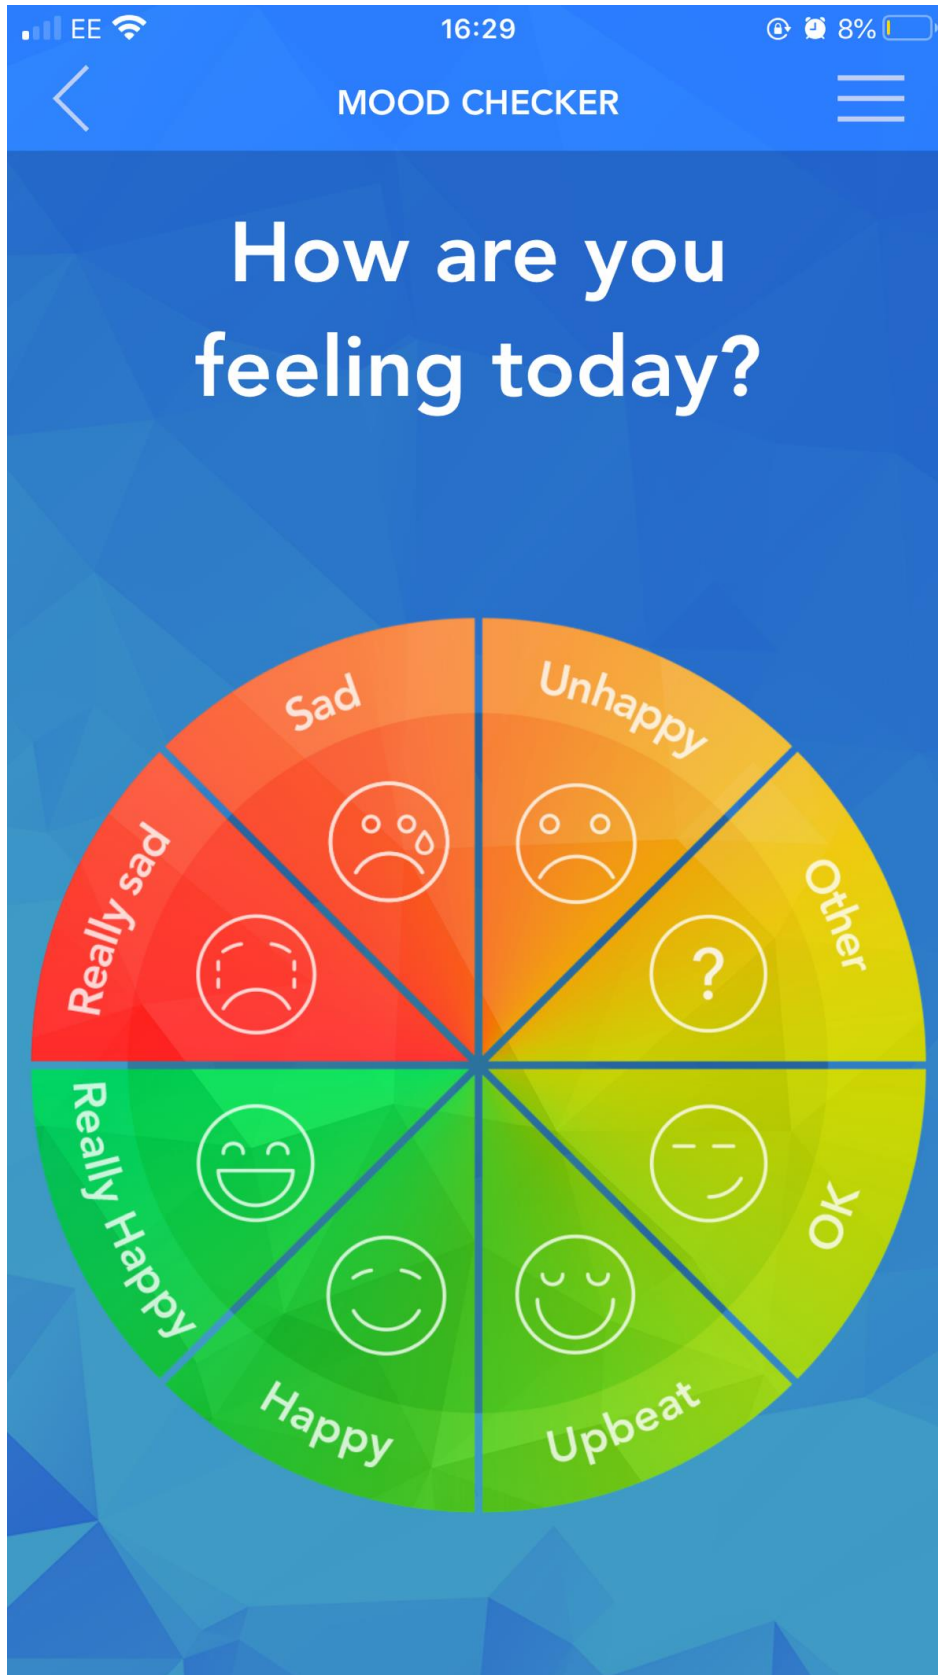

MOOD DIARY

September 2020

| S  | M  | T  | W  | T  | F  | S  |
|----|----|----|----|----|----|----|
|    |    | 1  | 2  | 3  | 4  | 5  |
| 6  | 7  | 8  | 9  | 10 | 11 | 12 |
| 13 | 14 | 15 | 16 | 17 | 18 | 19 |
| 20 | 21 | 22 | 23 | 24 | 25 | 26 |
| 27 | 28 | 29 | 30 |    |    |    |

Really Sad

15:48 1 note

Had an argument with my partner

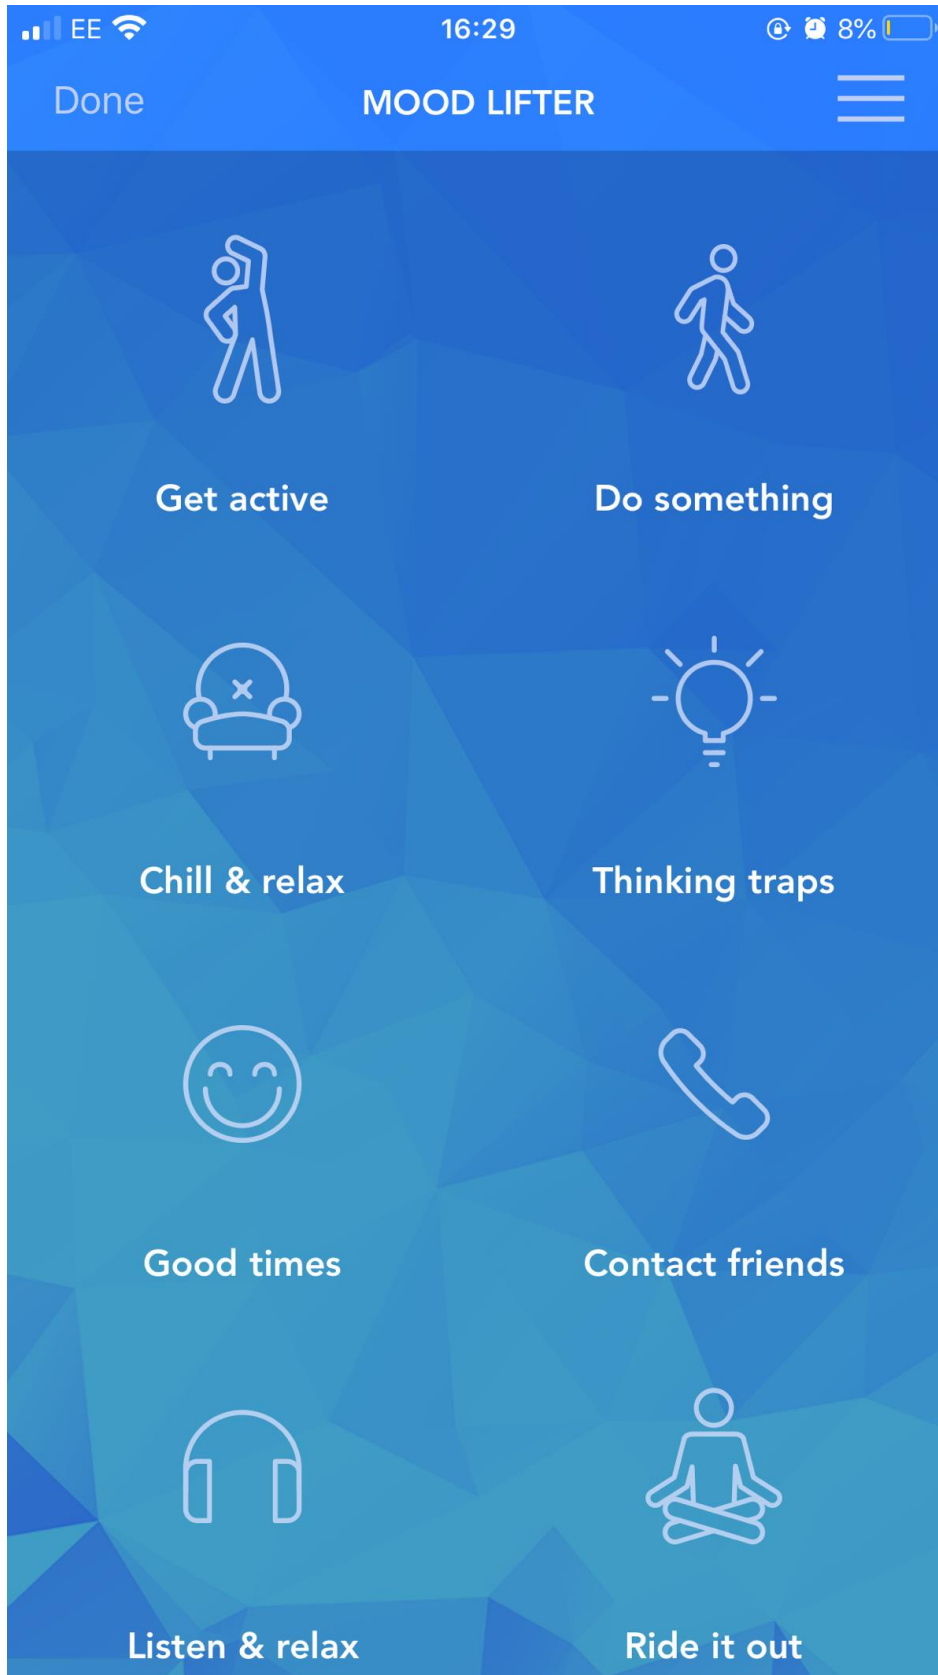

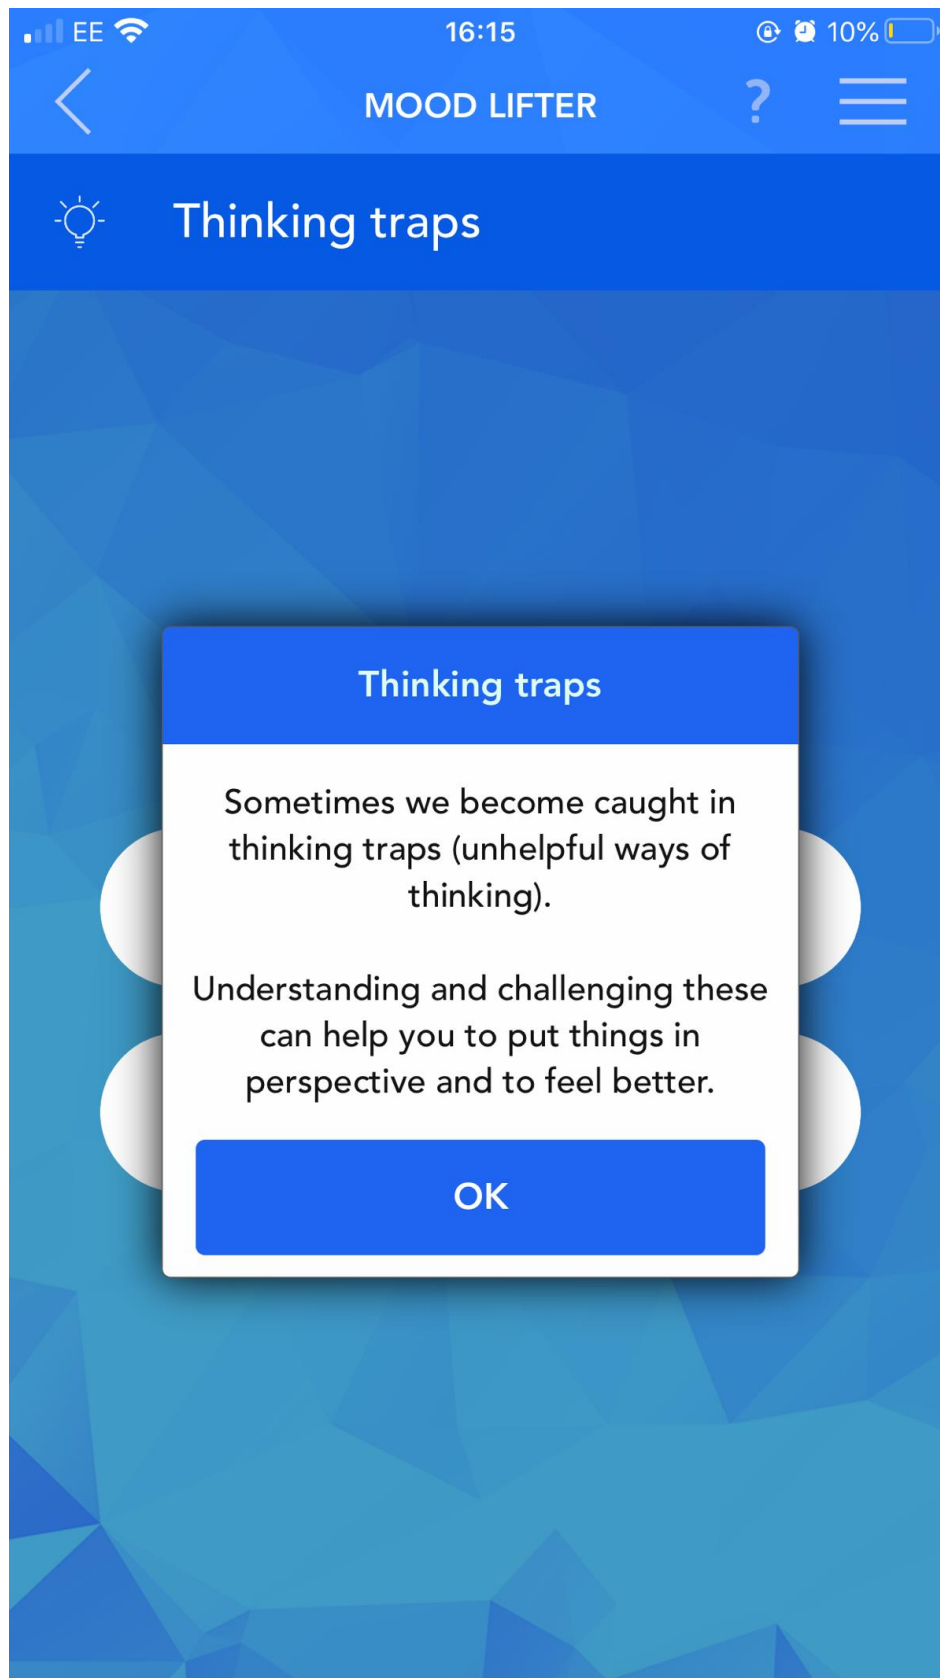

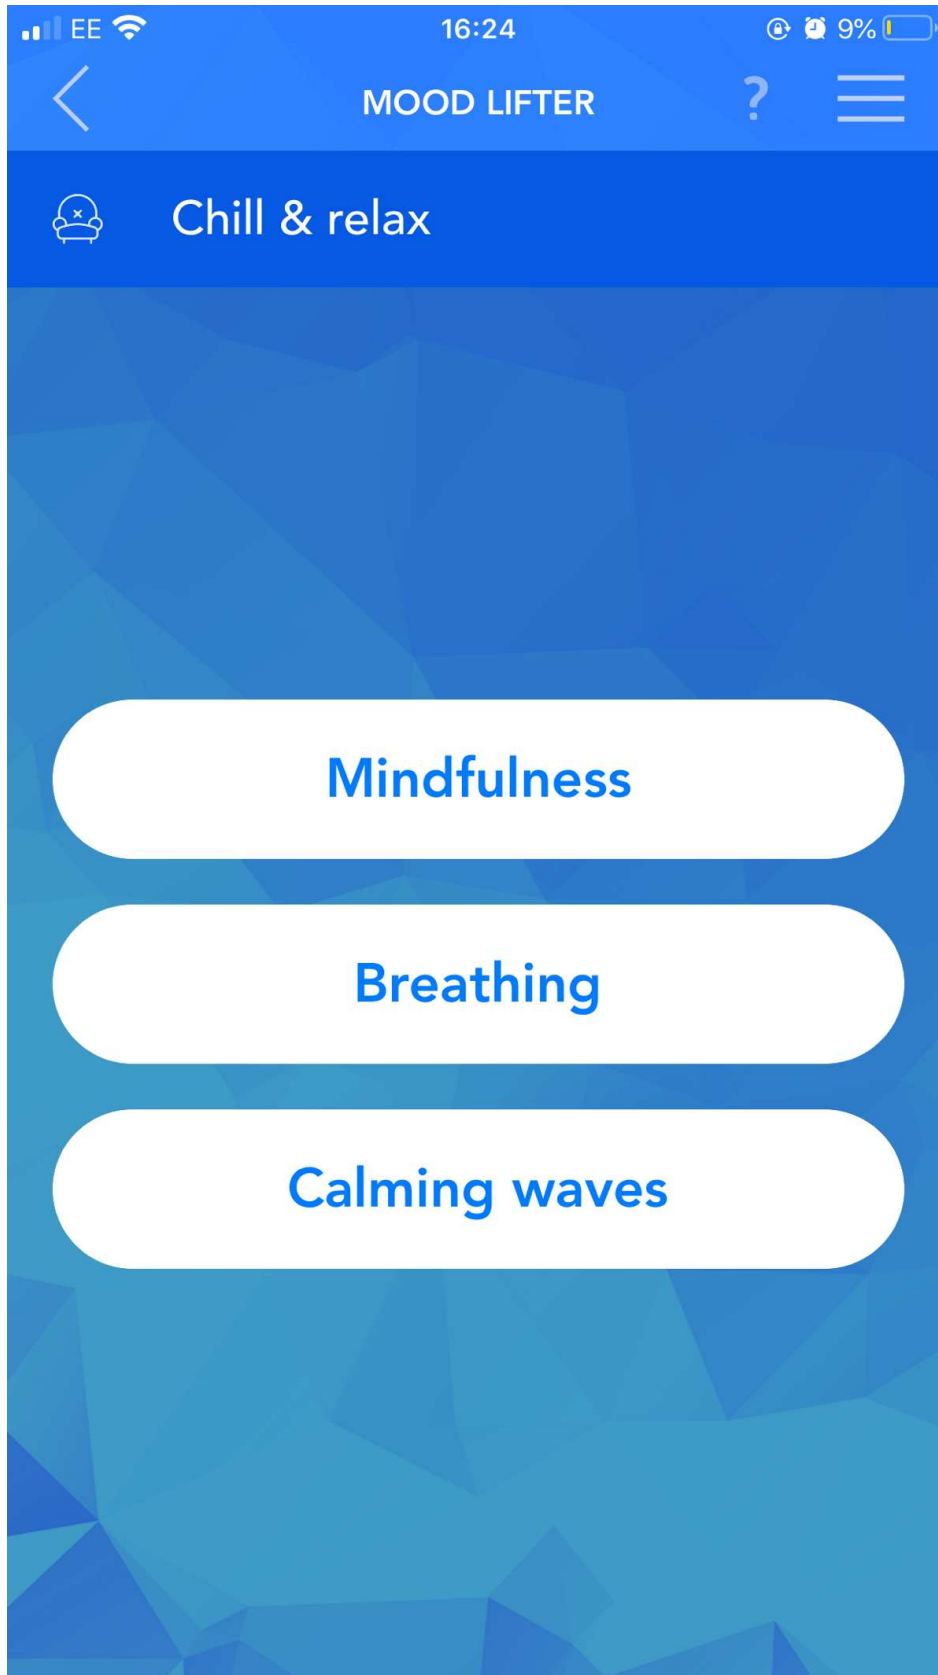



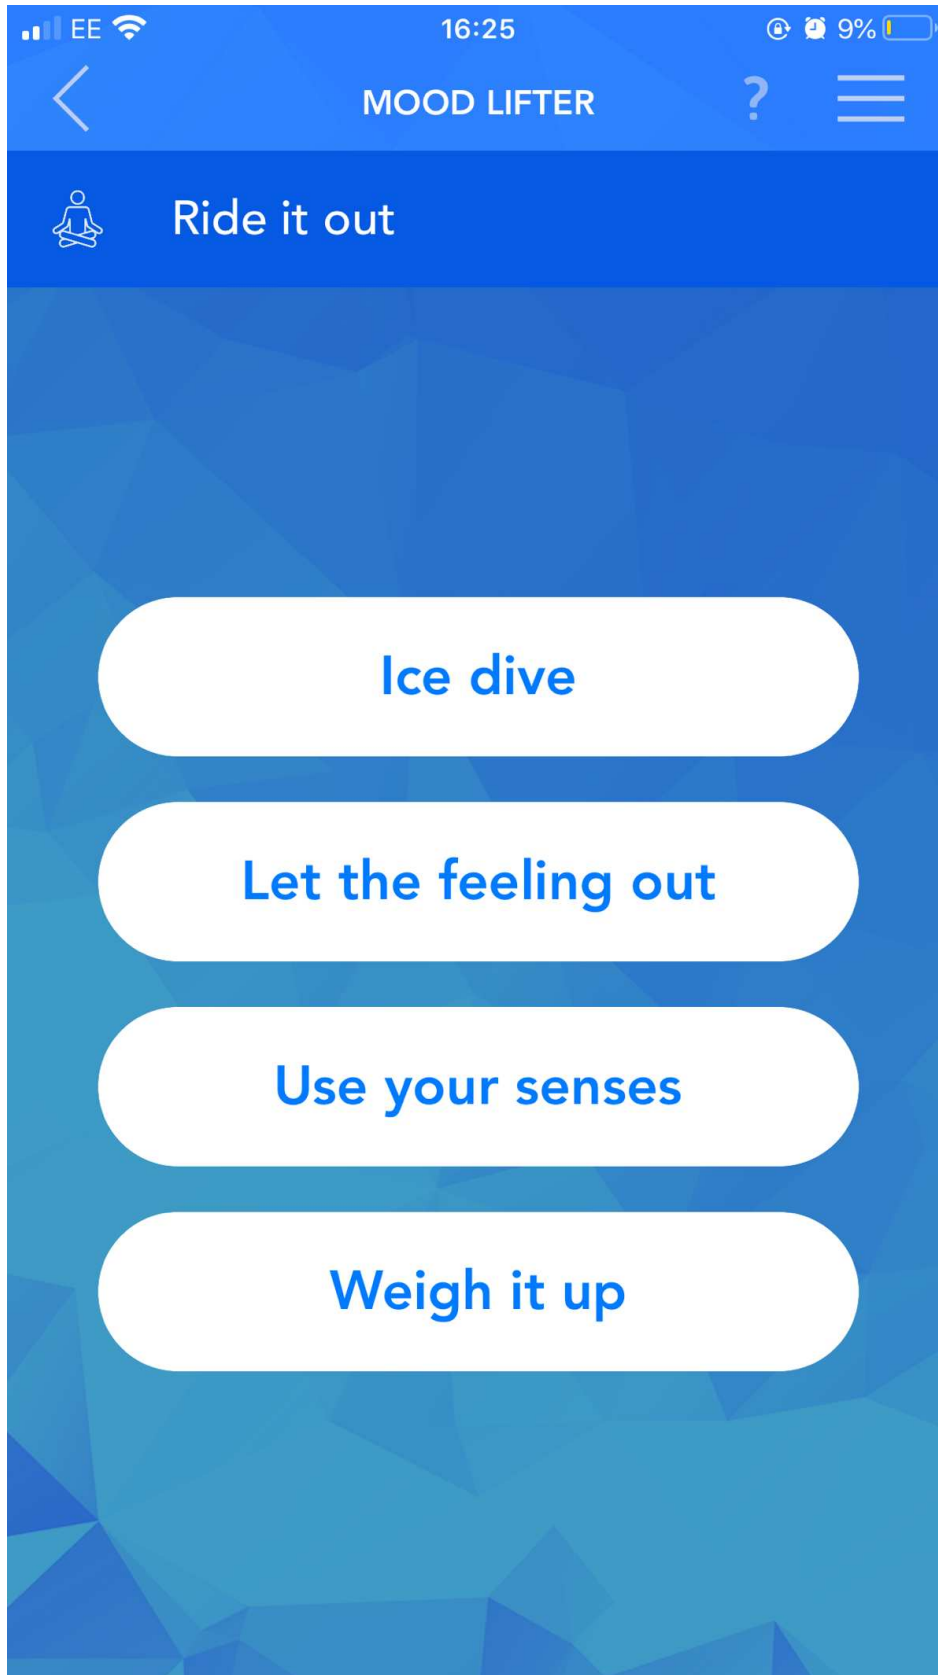

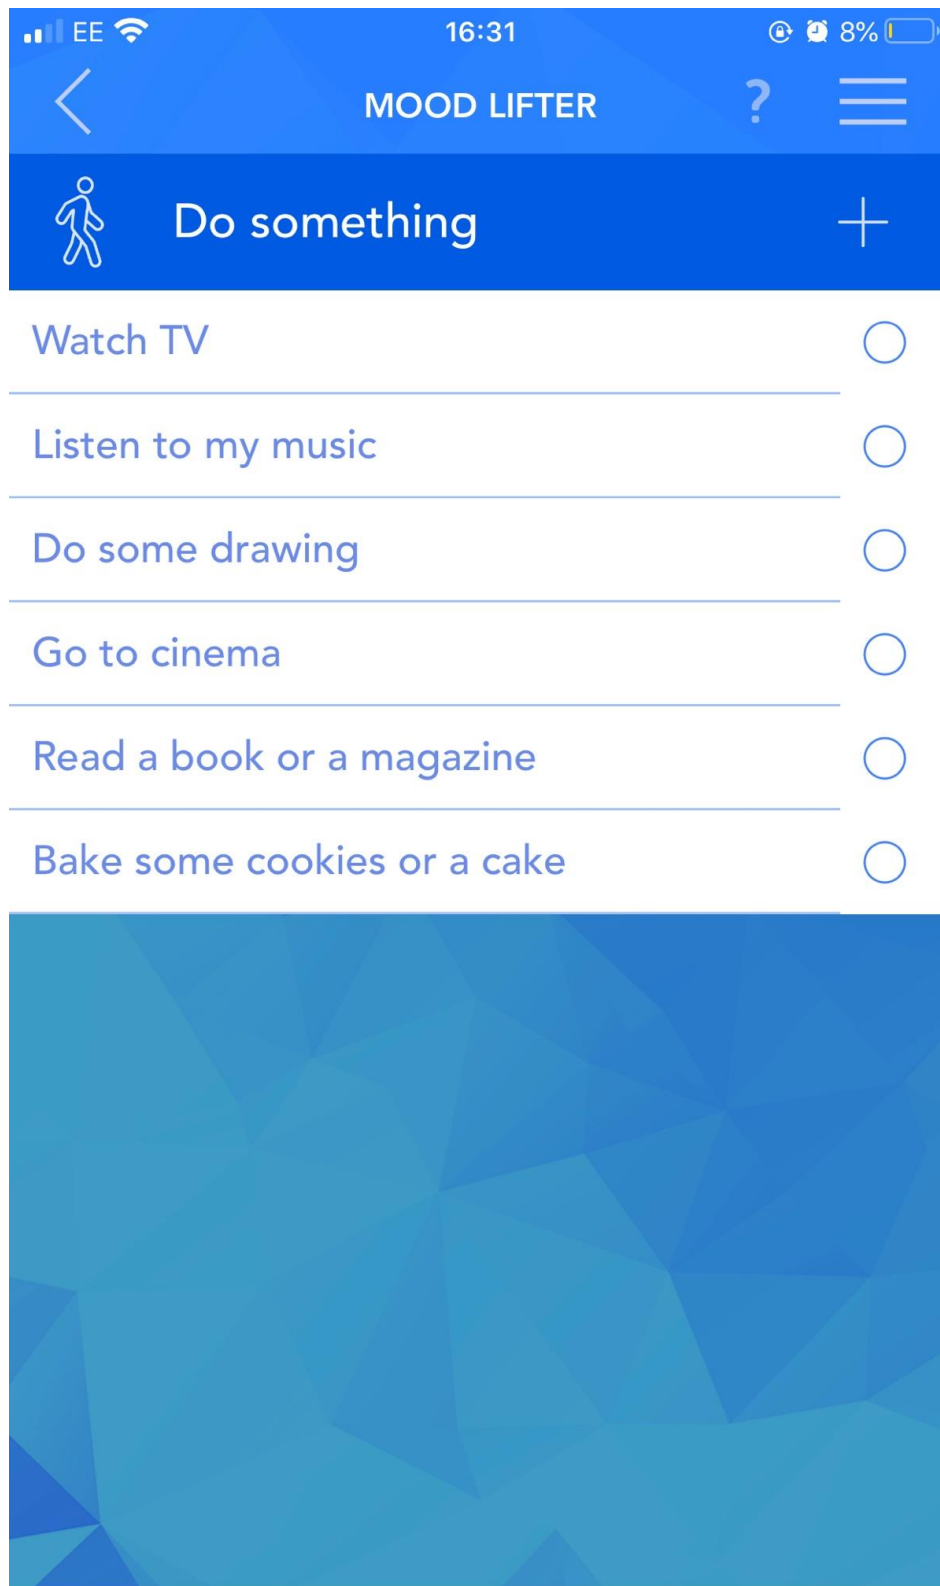

Record what you did

16:25 9%

VIEW HISTORY

Admin Diary

19/03/2020

**Get active:**  
**Activities:** Walk a mile  
**Notes:** No notes recorded.

17/09/2020

**Get active:**  
**Activities:** Walk a mile  
**Notes:** No notes recorded.

**Do something:**  
**Activities:** Watch TV  
**Notes:** No notes recorded.

13/10/2020

**Do something:**  
**Activities:** Watch TV  
**Notes:** I watched a film and it helped take my mind off things
