# Supplementary material for: Is a smartphone application (BlueIce) acceptable and safe for university students who self-harm: an open study
Source: PubMed Central journal article supplement — BMJ Open. 2024 Apr 24;14(4):e069862. doi: 10.1136/bmjopen-2022-069862 (PMC11043752; doi:10.1136/bmjopen-2022-069862), 2024-04-24
Supplement: bmjopen-2022-069862supp006.pdf [file bmjopen-2022-069862supp006.pdf]

| Categories                           | Codes | Barrier                  | Facilitator               |
|--------------------------------------|-------|--------------------------|---------------------------|
| <i>Intervention Specific factors</i> |       |                          |                           |
| <b>Suitability</b>                   |       | Heterogeneity            | Target populations        |
| <b>Usability</b>                     |       | Not user friendly        | User friendly             |
| <b>Acceptability</b>                 |       |                          | Safe                      |
|                                      |       | Unhelpful                |                           |
|                                      |       | Toolbox                  | Personalisation options   |
| <i>Person Specific Factors</i>       |       |                          |                           |
| <b>Motivation</b>                    |       | Engagement barriers      |                           |
|                                      |       |                          | Positive impact           |
| <b>Capability</b>                    |       | Motivation               |                           |
| <b>Opportunity</b>                   |       | Further support required |                           |
|                                      |       |                          | Barriers to other support |
|                                      |       |                          | Adjunct to therapy        |
